# Supplementary material for: Exploration of nonlinear optical enhancement in acceptor–π–donor indacenodithiophene based derivatives via structural variations: a DFT approach
Source: Royal Society of Chemistry journal article supplement (doi:10.1039/d3ra04858f), 2023-01-01
Supplement: d3ra04858f1.pdf [file d3ra04858f1.pdf]

## Exploration of Nonlinear Optical Enhancement in Acceptor- $\pi$ -Donor Indacenodithiophene Based Derivatives *via* Structural Variations: A DFT Approach

Saba Abid,<sup>1,2</sup> Muhammad Khalid,<sup>\*1,2</sup> Muhammad Sagir,<sup>3</sup> Muhammad Imran,<sup>4</sup> Ataulpa A. C. Braga,<sup>5</sup> Suvash Chandra Ojha,<sup>\*6</sup>

<sup>1</sup>Institute of Chemistry, Khwaja Fareed University of Engineering & Information Technology, Rahim Yar Khan, 64200, Pakistan

<sup>2</sup>Centre for Theoretical and Computational Research, Khwaja Fareed University of Engineering & Information Technology, Rahim Yar Khan, 64200, Pakistan

<sup>3</sup>Institute of Chemical and Environmental Engineering, Khwaja Fareed University of Engineering & Information Technology, Rahim Yar Khan, 64200, Pakistan

<sup>4</sup>Department of Chemistry, Faculty of Science, King Khalid University, P.O. Box 9004, Abha 61413, Saudi Arabia

<sup>5</sup>Departamento de Química Fundamental, Instituto de Química, Universidade de São Paulo, Av. Prof. Lineu Prestes, 748, São Paulo, 05508-000, Brazil

<sup>6</sup>Department of Infectious Diseases, The Affiliated Hospital of Southwest Medical University, Luzhou 646000, China

\*Corresponding authors E-mail addresses:

Dr. Muhammad Khalid ([muhhammad.khalid@kfueit.edu.pk](mailto:muhhammad.khalid@kfueit.edu.pk); [Khalid@iq.usp.br](mailto:Khalid@iq.usp.br))

Dr. Suvash Chandra Ojha ([suvash\\_ojha@swmu.edu.cn](mailto:suvash_ojha@swmu.edu.cn))

\*Corresponding authors E-mail addresses:

Dr. Muhammad Khalid ([muhhammad.khalid@kfueit.edu.pk](mailto:muhhammad.khalid@kfueit.edu.pk); [Khalid@iq.usp.br](mailto:Khalid@iq.usp.br))

**Table S1:** Computed transition energy ( $eV$ ), maximum absorption wavelengths ( $\lambda_{\max}$ ), oscillator strengths ( $f_{os}$ ) and transition natures of compound **TNPR** in chloroform at B3LYP functional with 6-311G(d,p) basis set

| NO. | $\lambda_{DFT}$ (nm) | $E$ (eV) | $f_{os}$ | MO contributions                                                                                        |
|-----|----------------------|----------|----------|---------------------------------------------------------------------------------------------------------|
| 1   | 798.404              | 1.553    | 2.624    | H $\rightarrow$ L (96%), H-1 $\rightarrow$ L+1 (2%)                                                     |
| 2   | 740.027              | 1.675    | 0.001    | H $\rightarrow$ L+1 (99%),                                                                              |
| 3   | 598.293              | 2.072    | 0.006    | H-1 $\rightarrow$ L (98%),                                                                              |
| 4   | 584.418              | 2.122    | 1.183    | H-1 $\rightarrow$ L+1 (88%), H $\rightarrow$ L (3%), H $\rightarrow$ L+2 (5%), H $\rightarrow$ L+4 (2%) |
| 5   | 564.026              | 2.198    | 0.138    | H $\rightarrow$ L+2 (87%), H-1 $\rightarrow$ L+1 (6%), H-1 $\rightarrow$ L+3 (5%)                       |
| 6   | 554.317              | 2.237    | 0.000    | H $\rightarrow$ L+3 (93%), H-1 $\rightarrow$ L+2 (5%)                                                   |

**Table S2:** Computed transition energy ( $eV$ ), maximum absorption wavelengths ( $\lambda_{\max}$ ), oscillator strengths ( $f_{os}$ ) and transition natures of compound **TNPR** in chloroform at CAM-B3LYP functional with 6-311G(d,p) basis set

| NO. | $\lambda_{DFT}(nm)$ | $E(eV)$ | $f_{os}$ | MO contributions                                                                                                                      |
|-----|---------------------|---------|----------|---------------------------------------------------------------------------------------------------------------------------------------|
| 1   | 484.446             | 2.559   | 3.611    | H-2→L (13%), H-1→L+1 (31%), H→L (25%), H-7→L+1 (2%), H-2→L+1 (3%), H→L+1 (9%), H→L+2 (2%), H→L+4 (4%)                                 |
| 2   | 472.051             | 2.627   | 0.191    | H-2→L+1 (15%), H-1→L (38%), H→L+1 (23%), H-7→L (3%), H-2→L (5%), H→L (6%)                                                             |
| 3   | 378.844             | 3.273   | 0.212    | H-2→L (15%), H→L+4 (35%), H-7→L+1 (6%), H-1→L+1 (7%), H-1→L+3 (2%), H→L (8%), H→L+2 (9%)                                              |
| 4   | 361.186             | 3.433   | 0.019    | H-2→L+1 (13%), H-1→L+2 (10%), H→L+1 (17%), H→L+3 (13%), H-7→L (8%), H-2→L (3%), H-2→L+3 (5%), H-1→L (4%), H→L (8%), H→L+5 (3%)        |
| 5   | 353.302             | 3.509   | 0.055    | H-2→L+3 (13%), H-1→L+3 (16%), H→L+1 (23%), H-7→L+3 (3%), H-2→L+1 (3%), H-2→L+2 (5%), H-1→L+2 (7%), H→L+2 (4%), H→L+3 (8%), H→L+4 (3%) |
| 6   | 352.508             | 3.517   | 0.109    | H-2→L+2 (18%), H-1→L+2 (17%), H-1→L+3 (12%), H→L (16%), H→L+2 (10%), H-7→L+2 (3%), H-7→L+3 (2%), H-2→L+3 (4%), H→L+1 (3%), H→L+3 (2%) |

**Table S3:** Computed transition energy ( $eV$ ), maximum absorption wavelengths ( $\lambda_{\max}$ ), oscillator strengths ( $f_{os}$ ) and transition natures of compound **TNPR** in chloroform at M06 functional with 6-311G(d,p) basis set

| NO. | $\lambda_{DFT}(nm)$ | $E(eV)$ | $f_{os}$ | MO contributions                                             |
|-----|---------------------|---------|----------|--------------------------------------------------------------|
| 1   | 706.785             | 1.754   | 2.960    | H→L (86%), H-1→L+1 (8%)                                      |
| 2   | 658.895             | 1.882   | 0.016    | H→L+1 (89%), H-1→L (7%)                                      |
| 3   | 538.757             | 2.301   | 0.064    | H-1→L (83%), H-2→L+1 (5%), H→L+1 (7%)                        |
| 4   | 525.513             | 2.359   | 0.921    | H-1→L+1 (75%), H→L (10%), H-2→L (5%), H→L+2 (3%), H→L+4 (2%) |
| 5   | 502.530             | 2.467   | 0.166    | H-1→L+3 (10%), H→L+2 (77%), H-1→L+1 (6%)                     |
| 6   | 493.214             | 2.514   | 0.002    | H-1→L+2 (12%), H→L+3 (82%),                                  |

**Table S4:** Computed transition energy ( $eV$ ), maximum absorption wavelengths ( $\lambda_{\max}$ ), oscillator strengths ( $f_{os}$ ) and transition natures of compound **TNPR** in chloroform at MPW1PW91 functional with 6-311G(d,p) basis set

| NO. | $\lambda_{DFT}(nm)$ | $E(eV)$ | $f_{os}$ | MO contributions                                  |
|-----|---------------------|---------|----------|---------------------------------------------------|
| 1   | 782.926             | 1.584   | 3.495    | H→L (93%), H-1→L+1 (5%)                           |
| 2   | 698.660             | 1.775   | 0.001    | H→L+1 (96%), H-1→L (3%)                           |
| 3   | 573.258             | 2.163   | 0.001    | H-1→L (93%), H-2→L+1 (3%), H→L+1 (3%)             |
| 4   | 557.583             | 2.224   | 0.432    | H→L+2 (82%), H-1→L+1 (6%), H-1→L+3 (7%), H→L (3%) |
| 5   | 546.668             | 2.268   | 0.001    | H→L+3 (89%), H-1→L+2 (8%)                         |
| 6   | 544.053             | 2.279   | 0.419    | H-1→L+1 (82%), H→L (4%), H→L+2 (7%), H→L+4 (2%)   |

**Table S5:** Computed transition energy ( $eV$ ), maximum absorption wavelengths ( $\lambda_{\max}$ ), oscillator strengths ( $f_{os}$ ) and transition natures of compound **TNPR** in chloroform at  $\omega$ B97XD functional with 6-311G(d,p) basis set

| NO. | $\lambda_{DFT}(nm)$ | $E(eV)$ | $f_{os}$ | MO contributions |
|-----|---------------------|---------|----------|------------------|
|-----|---------------------|---------|----------|------------------|

|   |         |       |       |                                                                                                                                              |
|---|---------|-------|-------|----------------------------------------------------------------------------------------------------------------------------------------------|
| 1 | 454.638 | 2.727 | 3.145 | H-2→L (15%), H-1→L+1 (33%), H→L (11%), H→L+1 (10%), H-7→L+1 (5%), H-2→L+1 (8%), H-1→L+3 (2%), H→L+4 (4%)                                     |
| 2 | 444.420 | 2.790 | 0.607 | H-2→L (12%), H-2→L+1 (18%), H-1→L (38%), H-7→L (5%), H-1→L+2 (2%), H→L (4%), H→L+1 (9%)                                                      |
| 3 | 362.527 | 3.420 | 0.560 | H→L+4 (52%), H-7→L+1 (5%), H-2→L (7%), H-2→L+4 (2%), H-1→L+1 (3%), H-1→L+3 (2%), H-1→L+5 (3%), H→L (2%), H→L+2 (6%)                          |
| 4 | 342.706 | 3.618 | 0.029 | H-2→L+3 (20%), H-1→L+2 (23%), H→L+3 (12%), H-24→L+2 (3%), H-23→L+3 (4%), H-20→L+1 (3%), H-7→L (3%), H-7→L+2 (3%), H-2→L+1 (3%), H-1→L+3 (3%) |
| 5 | 338.477 | 3.663 | 0.054 | H-2→L+2 (24%), H-1→L+3 (21%), H-24→L+3 (4%), H-23→L+2 (4%), H-23→L+3 (2%), H-20→L (2%), H-7→L+3 (5%), H-1→L+2 (4%), H→L+2 (5%), H→L+4 (7%)   |
| 6 | 335.655 | 3.694 | 0.007 | H-24→L+2 (24%), H-24→L+3 (12%), H-23→L+2 (11%), H-26→L+2 (2%), H-24→L (5%), H-23→L+3 (5%), H-21→L+2 (7%), H-21→L+3 (4%)                      |

**Table S6:** Cartesian coordinates of TNPR

| Atom | X-axis   | Y-axis   | Z-axis   |
|------|----------|----------|----------|
| C    | -0.77926 | -1.23708 | 0.545443 |
| C    | 0.59375  | -1.36381 | 0.50919  |
| C    | 1.344184 | -0.2005  | 0.352007 |
| C    | 0.732246 | 1.062195 | 0.235569 |
| C    | -0.63951 | 1.191972 | 0.303464 |
| C    | -1.38987 | 0.028736 | 0.462267 |
| H    | 1.076002 | -2.33631 | 0.573084 |
| H    | -1.12284 | 2.162399 | 0.219167 |
| C    | 2.764793 | 0.017902 | 0.239744 |
| C    | 3.054492 | 1.33837  | 0.017987 |
| C    | 4.433136 | 1.607114 | -0.14494 |
| C    | 5.178168 | 0.446155 | -0.02148 |
| S    | 4.169785 | -0.96411 | 0.289877 |
| C    | -5.23504 | -0.6436  | 0.610001 |
| C    | -4.49275 | -1.81171 | 0.673955 |
| C    | -3.10828 | -1.53009 | 0.616518 |
| C    | -2.81269 | -0.19579 | 0.517943 |
| S    | -4.21696 | 0.786814 | 0.467677 |
| C    | -6.66059 | -0.43459 | 0.643906 |
| C    | -7.33176 | 0.681212 | 1.098364 |
| S    | -7.78459 | -1.59541 | -0.00379 |
| C    | -8.71962 | 0.603712 | 0.943977 |
| H    | -6.82376 | 1.519592 | 1.56112  |
| C    | -9.15284 | -0.57289 | 0.369073 |
| H    | -9.40232 | 1.377059 | 1.278014 |
| C    | 6.602044 | 0.235529 | -0.10091 |

---

|   |          |          |          |
|---|----------|----------|----------|
| C | 7.259496 | -0.90405 | -0.51408 |
| S | 7.742881 | 1.427892 | 0.44934  |
| C | 8.650855 | -0.81733 | -0.4108  |
| H | 6.737008 | -1.77238 | -0.89907 |
| C | 9.1035   | 0.388197 | 0.08688  |
| H | 9.319248 | -1.61875 | -0.70535 |
| C | -1.82798 | -2.35268 | 0.599817 |
| C | 1.774239 | 2.160017 | -0.01055 |
| C | -10.5077 | -0.9423  | 0.072357 |
| C | -11.0567 | -2.20527 | -0.15765 |
| S | -11.6956 | 0.323279 | -0.01926 |
| C | -12.4283 | -2.12051 | -0.37209 |
| C | -12.9695 | -0.83737 | -0.32968 |
| H | -13.055  | -2.99081 | -0.54596 |
| C | 10.46897 | 0.79071  | 0.265655 |
| C | 10.98644 | 1.940359 | 0.86815  |
| S | 11.72192 | -0.26644 | -0.31894 |
| C | 12.37684 | 1.93244  | 0.849891 |
| C | 12.96818 | 0.821337 | 0.25422  |
| H | 12.97841 | 2.731421 | 1.274262 |
| C | -10.3129 | -3.50019 | -0.14767 |
| H | -9.65163 | -3.59911 | -1.01559 |
| H | -9.69443 | -3.60801 | 0.749154 |
| H | -11.0144 | -4.3372  | -0.17461 |
| C | 10.19287 | 3.049333 | 1.475991 |
| H | 9.587099 | 3.576201 | 0.730597 |
| H | 9.512851 | 2.686983 | 2.25449  |
| H | 10.8609  | 3.782205 | 1.933968 |
| C | -5.06432 | -3.18203 | 0.834866 |
| H | -6.02309 | -3.16199 | 1.359368 |
| H | -5.22352 | -3.66952 | -0.13459 |
| H | -4.38271 | -3.8157  | 1.409187 |
| C | 4.992742 | 2.952488 | -0.47073 |
| H | 5.153966 | 3.554003 | 0.431938 |
| H | 5.946706 | 2.877555 | -0.9983  |
| H | 4.300848 | 3.50774  | -1.11049 |
| C | -1.8212  | -3.17805 | -0.69435 |
| C | -2.34741 | -4.46378 | -0.73389 |
| C | -1.36515 | -2.5941  | -1.8788  |
| C | -2.40357 | -5.15636 | -1.93993 |
| H | -2.70506 | -4.93807 | 0.173967 |
| C | -1.4193  | -3.29217 | -3.07967 |
| H | -0.96242 | -1.58804 | -1.85579 |

---

---

|   |          |          |          |
|---|----------|----------|----------|
| C | -1.94297 | -4.58485 | -3.10936 |
| H | -2.81058 | -6.16273 | -1.96127 |
| H | -1.9715  | -5.1147  | -4.05604 |
| C | -1.59222 | -3.16767 | 1.86668  |
| C | -0.64192 | -4.19367 | 1.888331 |
| C | -2.23853 | -2.82944 | 3.044759 |
| C | -0.36915 | -4.85722 | 3.070847 |
| H | -0.1269  | -4.47986 | 0.976571 |
| C | -1.96278 | -3.50256 | 4.236535 |
| H | -2.97437 | -2.03006 | 3.073402 |
| C | -1.02209 | -4.52685 | 4.253551 |
| H | 0.367091 | -5.65525 | 3.080443 |
| C | 1.462534 | 2.742233 | -1.38956 |
| C | 0.523172 | 3.767335 | -1.5384  |
| C | 2.008067 | 2.165137 | -2.52577 |
| C | 0.161931 | 4.194641 | -2.80352 |
| H | 0.079602 | 4.233447 | -0.66418 |
| C | 1.636322 | 2.59383  | -3.80113 |
| H | 2.731595 | 1.357063 | -2.45506 |
| C | 0.708646 | 3.620082 | -3.94591 |
| H | -0.56483 | 4.994086 | -2.91188 |
| H | 0.407535 | 3.975209 | -4.92425 |
| C | 1.827436 | 3.189354 | 1.119535 |
| C | 2.334502 | 4.474896 | 0.909661 |
| C | 1.463998 | 2.818601 | 2.405462 |
| C | 2.457771 | 5.352777 | 1.972343 |
| H | 2.624235 | 4.793436 | -0.08599 |
| C | 1.591329 | 3.70424  | 3.475817 |
| H | 1.072393 | 1.82752  | 2.616914 |
| C | 2.089934 | 4.985211 | 3.26143  |
| H | 2.847431 | 6.351459 | 1.799448 |
| O | -0.98051 | -2.79963 | -4.26078 |
| O | 2.230933 | 1.945489 | -4.82847 |
| C | -0.42811 | -1.50052 | -4.27949 |
| H | -1.16246 | -0.7449  | -3.97356 |
| H | 0.453954 | -1.42486 | -3.63022 |
| C | 1.889126 | 2.3308   | -6.14234 |
| H | 2.468342 | 1.694287 | -6.81044 |
| H | 0.820511 | 2.180566 | -6.3401  |
| C | 14.372   | 0.714781 | 0.186056 |
| C | 15.23871 | -0.22326 | -0.31747 |
| H | 14.8296  | 1.586956 | 0.644562 |
| C | -14.3532 | -0.64188 | -0.51567 |

---

---

|   |          |          |          |
|---|----------|----------|----------|
| C | -15.1694 | 0.461941 | -0.53504 |
| H | -14.842  | -1.59813 | -0.68111 |
| C | 16.09885 | -2.1673  | -1.34476 |
| C | 16.23926 | -3.38156 | -1.98467 |
| C | 17.526   | -3.84386 | -2.22815 |
| C | 18.62594 | -3.0891  | -1.83066 |
| C | 18.47835 | -1.86541 | -1.18625 |
| C | 17.19191 | -1.39621 | -0.93876 |
| H | 15.35969 | -3.94441 | -2.28113 |
| H | 17.67916 | -4.79411 | -2.72864 |
| H | 19.62601 | -3.46147 | -2.02679 |
| H | 19.36194 | -1.31324 | -0.89546 |
| C | -18.2825 | 2.486128 | -0.93698 |
| C | -17.0386 | 1.8884   | -0.75782 |
| C | -15.9198 | 2.700325 | -0.55078 |
| C | -15.9939 | 4.077418 | -0.5123  |
| C | -17.2385 | 4.667175 | -0.69076 |
| C | -18.363  | 3.874256 | -0.90119 |
| H | -19.1826 | 1.910291 | -1.10493 |
| H | -15.0965 | 4.665376 | -0.34731 |
| H | -17.3393 | 5.747106 | -0.66801 |
| H | -19.3293 | 4.347321 | -1.04162 |
| C | 16.69107 | -0.16498 | -0.2914  |
| C | 14.84877 | -1.47787 | -0.98133 |
| C | -14.7217 | 1.85728  | -0.39752 |
| C | -16.6096 | 0.473666 | -0.7335  |
| C | 17.49788 | 0.824232 | 0.223744 |
| C | -17.4631 | -0.59919 | -0.85523 |
| O | 13.72424 | -1.88355 | -1.19798 |
| O | -13.5909 | 2.258128 | -0.20549 |
| C | 17.01787 | 2.010891 | 0.840564 |
| N | 16.66979 | 2.989347 | 1.348564 |
| C | 18.91756 | 0.770614 | 0.195485 |
| N | 20.0733  | 0.775766 | 0.198388 |
| C | -17.0551 | -1.95866 | -0.78875 |
| N | -16.7655 | -3.07671 | -0.73749 |
| C | -18.8647 | -0.46626 | -1.04731 |
| N | -20.0083 | -0.41202 | -1.20515 |
| H | -0.12806 | -1.30944 | -5.30944 |
| H | 2.146062 | 3.379813 | -6.33385 |
| H | -0.79245 | -5.06716 | 5.164217 |
| O | -2.66272 | -3.08471 | 5.315143 |
| C | -2.42544 | -3.72631 | 6.549192 |

---

|   |          |          |          |
|---|----------|----------|----------|
| H | -3.07876 | -3.24585 | 7.276739 |
| H | -2.66774 | -4.79505 | 6.500112 |
| H | -1.38309 | -3.60842 | 6.869939 |
| H | 2.193597 | 5.693962 | 4.074375 |
| O | 1.201086 | 3.223905 | 4.678323 |
| C | 1.305358 | 4.075613 | 5.798111 |
| H | 0.685913 | 4.973313 | 5.680233 |
| H | 0.946183 | 3.504789 | 6.653798 |
| H | 2.34441  | 4.37748  | 5.97901  |

**Table S7:** Cartesian coordinates of **TNPD1**

| <b>Atom</b> | <b>X-axis</b> | <b>Y-axis</b> | <b>Z-axis</b> |
|-------------|---------------|---------------|---------------|
| C           | -0.16107      | -0.59366      | 1.714775      |
| C           | 1.216395      | -0.64691      | 1.698085      |
| C           | 1.895584      | 0.453056      | 1.178532      |
| C           | 1.2061        | 1.581706      | 0.698193      |
| C           | -0.1696       | 1.661179      | 0.777658      |
| C           | -0.84936      | 0.559835      | 1.292949      |
| H           | 1.752925      | -1.53645      | 2.020286      |
| H           | -0.70875      | 2.531069      | 0.409846      |
| C           | 3.294912      | 0.681803      | 0.916978      |
| C           | 3.494204      | 1.856209      | 0.240136      |
| C           | 4.839209      | 2.087992      | -0.12916      |
| C           | 5.655648      | 1.060098      | 0.313219      |
| S           | 4.751783      | -0.18622      | 1.17035       |
| C           | -4.6477       | -0.31058      | 1.60091       |
| C           | -3.83417      | -1.36904      | 1.960837      |
| C           | -2.46778      | -1.01626      | 1.841576      |
| C           | -2.25691      | 0.267095      | 1.412061      |
| S           | -3.725        | 1.103576      | 1.105679      |
| C           | -6.08918      | -0.21056      | 1.562006      |
| C           | -6.87045      | 0.884117      | 1.838191      |
| S           | -7.08358      | -1.53905      | 1.021651      |
| C           | -8.24622      | 0.660411      | 1.648971      |
| H           | -6.45512      | 1.817993      | 2.201144      |
| C           | -8.54867      | -0.61006      | 1.219571      |
| H           | -9.00797      | 1.405212      | 1.851984      |
| C           | 7.077994      | 0.869856      | 0.179724      |
| C           | 7.762599      | -0.32674      | 0.139616      |
| S           | 8.192817      | 2.206099      | 0.151367      |
| C           | 9.150539      | -0.17725      | 0.067414      |

---

|   |          |          |          |
|---|----------|----------|----------|
| H | 7.261026 | -1.28777 | 0.145108 |
| C | 9.574286 | 1.136113 | 0.051871 |
| H | 9.836098 | -1.01584 | 0.016289 |
| C | -1.13629 | -1.73375 | 2.013005 |
| C | 2.166795 | 2.567222 | 0.021389 |
| C | -9.84972 | -1.15412 | 0.909653 |
| C | -10.2976 | -2.45763 | 0.882381 |
| S | -11.1344 | -0.04383 | 0.49197  |
| C | -11.6652 | -2.54328 | 0.528497 |
| C | -12.2746 | -1.34192 | 0.286507 |
| H | -12.1818 | -3.49413 | 0.440119 |
| C | 10.92442 | 1.605543 | -0.07309 |
| C | 11.43337 | 2.900165 | 0.047144 |
| S | 12.17075 | 0.439546 | -0.41488 |
| C | 12.81385 | 2.915377 | -0.13027 |
| C | 13.40299 | 1.681527 | -0.38586 |
| H | 13.40761 | 3.823056 | -0.07005 |
| C | -9.47638 | -3.66898 | 1.186448 |
| H | -8.8201  | -3.93908 | 0.350779 |
| H | -8.8395  | -3.52225 | 2.064324 |
| H | -10.1248 | -4.5272  | 1.380958 |
| C | 10.64164 | 4.131561 | 0.340894 |
| H | 9.943326 | 4.372341 | -0.46829 |
| H | 10.05504 | 4.030677 | 1.260448 |
| H | 11.30886 | 4.987531 | 0.464415 |
| C | -4.32877 | -2.68815 | 2.458365 |
| H | -5.31911 | -2.59994 | 2.912025 |
| H | -4.3963  | -3.42637 | 1.650194 |
| H | -3.64803 | -3.09349 | 3.212817 |
| C | 5.293865 | 3.247928 | -0.95197 |
| H | 5.491539 | 4.132648 | -0.33492 |
| H | 6.20546  | 3.01715  | -1.50847 |
| H | 4.522452 | 3.523959 | -1.67677 |
| C | -1.05025 | -2.79986 | 0.908673 |
| C | -1.56229 | -4.07756 | 1.104676 |
| C | -0.53332 | -2.46227 | -0.34484 |
| C | -1.54928 | -5.00044 | 0.063138 |
| H | -1.96266 | -4.36411 | 2.071646 |
| C | -0.51001 | -3.39234 | -1.37745 |
| H | -0.14014 | -1.46633 | -0.51265 |
| C | -1.027   | -4.67135 | -1.17267 |
| H | -1.94778 | -5.9973  | 0.22596  |
| H | -0.99741 | -5.38447 | -1.99024 |

---



---

|   |          |          |          |
|---|----------|----------|----------|
| C | -0.87028 | -2.25874 | 3.416962 |
| C | 0.112533 | -3.22633 | 3.646996 |
| C | -1.52495 | -1.69709 | 4.501831 |
| C | 0.409542 | -3.61352 | 4.941712 |
| H | 0.634878 | -3.68272 | 2.811796 |
| C | -1.22487 | -2.09138 | 5.806529 |
| H | -2.28635 | -0.93366 | 4.363301 |
| C | -0.25095 | -3.05899 | 6.032449 |
| H | 1.171274 | -4.3678  | 5.114649 |
| C | 1.737656 | 2.589293 | -1.44749 |
| C | 0.768311 | 3.487206 | -1.90324 |
| C | 2.186309 | 1.596339 | -2.3058  |
| C | 0.276935 | 3.377182 | -3.19235 |
| H | 0.39527  | 4.268147 | -1.24825 |
| C | 1.67766  | 1.479432 | -3.59901 |
| H | 2.931367 | 0.871523 | -1.98675 |
| C | 0.717076 | 2.377681 | -4.05277 |
| H | -0.47416 | 4.079463 | -3.54106 |
| H | 0.310106 | 2.311455 | -5.05466 |
| C | 2.211089 | 3.932465 | 0.704481 |
| C | 2.653984 | 5.071876 | 0.026184 |
| C | 1.90497  | 4.037668 | 2.052818 |
| C | 2.772128 | 6.275748 | 0.697682 |
| H | 2.897393 | 5.020473 | -1.02961 |
| C | 2.027937 | 5.251851 | 2.729109 |
| H | 1.563384 | 3.177055 | 2.621095 |
| C | 2.462709 | 6.384551 | 2.048702 |
| H | 3.111392 | 7.156985 | 0.161564 |
| O | 0.00335  | -3.14262 | -2.60427 |
| O | 2.171928 | 0.450584 | -4.32788 |
| C | 0.62972  | -1.89721 | -2.83224 |
| H | -0.08109 | -1.06153 | -2.76878 |
| H | 1.449442 | -1.71971 | -2.12257 |
| C | 1.667008 | 0.262959 | -5.63251 |
| H | 2.174918 | -0.61278 | -6.03646 |
| H | 0.584875 | 0.077747 | -5.61993 |
| C | 14.79608 | 1.578353 | -0.58711 |
| C | 15.64695 | 0.537795 | -0.84868 |
| H | 15.25908 | 2.559559 | -0.51151 |
| C | 16.52652 | -1.60907 | -1.25304 |
| C | 16.91167 | -2.95365 | -1.48314 |
| C | 18.30839 | -3.03364 | -1.67955 |
| C | 17.56177 | -0.7209  | -1.27301 |

---

---

|   |          |          |          |
|---|----------|----------|----------|
| C | 17.08816 | 0.638788 | -1.03158 |
| C | 15.27355 | -0.888   | -0.99137 |
| C | 17.91456 | 1.736486 | -1.00545 |
| O | 14.1658  | -1.37766 | -0.91192 |
| C | 17.47662 | 3.067482 | -0.78015 |
| N | 17.1497  | 4.161103 | -0.5999  |
| C | 19.31253 | 1.600623 | -1.21338 |
| N | 20.45069 | 1.491407 | -1.38217 |
| H | 1.040347 | -1.93921 | -3.84036 |
| H | 1.876601 | 1.127109 | -6.27429 |
| H | -0.00186 | -3.38507 | 7.035242 |
| O | -1.93479 | -1.47558 | 6.778906 |
| C | -1.67469 | -1.83419 | 8.118308 |
| H | -2.34096 | -1.23055 | 8.733744 |
| H | -1.88356 | -2.89596 | 8.29854  |
| H | -0.63575 | -1.62005 | 8.397852 |
| H | 2.561577 | 7.340751 | 2.548539 |
| O | 1.698209 | 5.22323  | 4.040379 |
| C | 1.801464 | 6.422117 | 4.77665  |
| H | 1.139324 | 7.199382 | 4.375501 |
| H | 1.496267 | 6.185224 | 5.795361 |
| H | 2.831539 | 6.799286 | 4.789333 |
| C | 18.94032 | -4.24994 | -1.92485 |
| C | 16.13778 | -4.11395 | -1.53429 |
| H | 20.01267 | -4.30489 | -2.07473 |
| H | 15.06491 | -4.06247 | -1.38477 |
| S | 19.09544 | -1.46901 | -1.57748 |
| C | 18.16658 | -5.38837 | -1.97309 |
| C | 16.77193 | -5.32151 | -1.77883 |
| C | -13.6589 | -1.0871  | -0.08978 |
| C | -14.653  | -2.03563 | 0.179151 |
| C | -14.0484 | 0.092021 | -0.73293 |
| C | -15.9677 | -1.82423 | -0.18567 |
| H | -14.3957 | -2.94464 | 0.71489  |
| C | -15.3614 | 0.309391 | -1.10442 |
| H | -13.3041 | 0.84608  | -0.97546 |
| C | -16.3433 | -0.64912 | -0.84295 |
| H | -16.7206 | -2.56912 | 0.052229 |
| H | -15.6353 | 1.22693  | -1.61736 |
| N | -17.6779 | -0.40745 | -1.21382 |
| C | -18.199  | 0.90808  | -1.05066 |
| C | -18.5926 | 1.658441 | -2.19345 |
| C | -18.3083 | 1.446739 | 0.206546 |

---

|   |          |          |          |
|---|----------|----------|----------|
| C | -19.1426 | 2.956292 | -1.99527 |
| C | -18.8315 | 2.739348 | 0.392394 |
| H | -17.9907 | 0.854044 | 1.060164 |
| C | -19.2527 | 3.472416 | -0.68328 |
| H | -18.9123 | 3.142866 | 1.39654  |
| H | -19.6703 | 4.466566 | -0.54811 |
| C | -18.5399 | -1.43914 | -1.63674 |
| C | -18.0558 | -2.50569 | -2.40033 |
| C | -19.9032 | -1.3853  | -1.34189 |
| C | -18.9146 | -3.50125 | -2.83466 |
| H | -17.0015 | -2.54457 | -2.65781 |
| C | -20.7569 | -2.38023 | -1.79488 |
| H | -20.2915 | -0.55816 | -0.75528 |
| C | -20.2713 | -3.44699 | -2.5375  |
| H | -18.5198 | -4.32127 | -3.42701 |
| H | -21.8143 | -2.32099 | -1.555   |
| H | -20.9418 | -4.22567 | -2.88576 |
| C | -18.4317 | 1.178382 | -3.51405 |
| C | -19.544  | 3.708581 | -3.12397 |
| H | -17.9866 | 0.200088 | -3.66893 |
| H | -19.9703 | 4.69557  | -2.96395 |
| C | -19.3918 | 3.211377 | -4.38913 |
| C | -18.8211 | 1.937463 | -4.58462 |
| H | -19.7015 | 3.799061 | -5.24755 |
| H | -18.6874 | 1.55926  | -5.59326 |
| C | 16.00474 | -6.52362 | -1.83582 |
| N | 15.38945 | -7.49857 | -1.88276 |
| H | 18.62725 | -6.35166 | -2.16214 |

**Table S8:** Cartesian coordinates of **TNPD2**

| <b>Atom</b> | <b>X-axis</b> | <b>Y-axis</b> | <b>Z-axis</b> |
|-------------|---------------|---------------|---------------|
| C           | 0.579365      | 0.282831      | 1.705966      |
| C           | -0.79901      | 0.290462      | 1.734736      |
| C           | -1.4611       | -0.74311      | 1.075562      |
| C           | -0.75383      | -1.76203      | 0.411033      |
| C           | 0.625542      | -1.8052       | 0.440788      |
| C           | 1.287856      | -0.77154      | 1.098931      |
| H           | -1.35165      | 1.103038      | 2.200889      |
| H           | 1.178562      | -2.59084      | -0.06886      |
| C           | -2.86096      | -0.98131      | 0.82485       |
| C           | -3.04697      | -2.04937      | -0.01264      |
| C           | -4.39652      | -2.27421      | -0.3702       |

|   |          |          |          |
|---|----------|----------|----------|
| C | -5.22859 | -1.35285 | 0.243612 |
| S | -4.33483 | -0.21412 | 1.248406 |
| C | 5.067734 | 0.152517 | 1.46828  |
| C | 4.234973 | 1.126872 | 1.986216 |
| C | 2.875788 | 0.758059 | 1.835709 |
| C | 2.689393 | -0.45478 | 1.227406 |
| S | 4.171928 | -1.19911 | 0.784853 |
| C | 6.51061  | 0.091769 | 1.405567 |
| C | 7.316584 | -1.0111  | 1.540876 |
| S | 7.471743 | 1.497799 | 1.02459  |
| C | 8.684975 | -0.73677 | 1.369944 |
| H | 6.923709 | -1.99082 | 1.790097 |
| C | 8.958192 | 0.582489 | 1.09412  |
| H | 9.462598 | -1.48548 | 1.474459 |
| C | -6.65995 | -1.19325 | 0.180591 |
| C | -7.37794 | -0.0254  | 0.32764  |
| S | -7.73799 | -2.54798 | 0.001232 |
| C | -8.7634  | -0.20772 | 0.277402 |
| H | -6.90261 | 0.940919 | 0.452056 |
| C | -9.15059 | -1.51905 | 0.092694 |
| H | -9.47389 | 0.606675 | 0.36559  |
| C | 1.529817 | 1.398724 | 2.144098 |
| C | -1.70607 | -2.66662 | -0.38097 |
| C | 10.24724 | 1.182365 | 0.846139 |
| C | 10.65761 | 2.497782 | 0.902198 |
| S | 11.57449 | 0.134532 | 0.399707 |
| C | 12.02999 | 2.641907 | 0.587749 |
| C | 12.6802  | 1.473883 | 0.294626 |
| H | 12.51952 | 3.61069  | 0.565151 |
| C | -10.4909 | -2.00974 | -0.06072 |
| C | -10.965  | -3.32211 | -0.06405 |
| S | -11.7705 | -0.8483  | -0.26704 |
| C | -12.3485 | -3.3555  | -0.21932 |
| C | -12.9717 | -2.1183  | -0.34042 |
| H | -12.9191 | -4.27967 | -0.23798 |
| C | 9.794165 | 3.667221 | 1.249675 |
| H | 9.11339  | 3.931546 | 0.431935 |
| H | 9.17847  | 3.474095 | 2.134067 |
| H | 10.41109 | 4.545437 | 1.45615  |
| C | -10.1375 | -4.5549  | 0.09349  |
| H | -9.46809 | -4.71056 | -0.75979 |
| H | -9.51612 | -4.51773 | 0.994592 |
| H | -10.7818 | -5.43375 | 0.16925  |

|   |          |          |          |
|---|----------|----------|----------|
| C | 4.70702  | 2.372075 | 2.663705 |
| H | 5.707031 | 2.243934 | 3.085652 |
| H | 4.744073 | 3.220753 | 1.97022  |
| H | 4.030301 | 2.646587 | 3.478686 |
| C | -4.84213 | -3.31843 | -1.33983 |
| H | -4.96582 | -4.29526 | -0.8571  |
| H | -5.79128 | -3.05492 | -1.81248 |
| H | -4.09836 | -3.44142 | -2.13274 |
| C | 1.37643  | 2.612144 | 1.21271  |
| C | 1.857064 | 3.8645   | 1.578898 |
| C | 0.826446 | 2.444591 | -0.06066 |
| C | 1.778249 | 4.929266 | 0.686082 |
| H | 2.28193  | 4.02081  | 2.564999 |
| C | 0.736589 | 3.514638 | -0.94289 |
| H | 0.459148 | 1.471313 | -0.36366 |
| C | 1.221316 | 4.767287 | -0.56771 |
| H | 2.152113 | 5.904763 | 0.982134 |
| H | 1.139902 | 5.591481 | -1.26905 |
| C | 1.294842 | 1.699877 | 3.617934 |
| C | 0.298663 | 2.594633 | 4.019965 |
| C | 1.995612 | 0.997865 | 4.586232 |
| C | 0.034018 | 2.772572 | 5.366491 |
| H | -0.26029 | 3.157815 | 3.279062 |
| C | 1.727945 | 1.18093  | 5.943479 |
| H | 2.768991 | 0.28485  | 4.312022 |
| C | 0.740368 | 2.07669  | 6.3412   |
| H | -0.73858 | 3.471124 | 5.673472 |
| C | -1.33169 | -2.44141 | -1.84795 |
| C | -0.33799 | -3.20822 | -2.46334 |
| C | -1.85929 | -1.35657 | -2.53216 |
| C | 0.099501 | -2.88017 | -3.73447 |
| H | 0.09561  | -4.05796 | -1.94566 |
| C | -1.40606 | -1.021   | -3.80787 |
| H | -2.62626 | -0.72856 | -2.0855  |
| C | -0.42043 | -1.78809 | -4.42041 |
| H | 0.870299 | -3.48111 | -4.20743 |
| H | -0.05457 | -1.55112 | -5.41226 |
| C | -1.6778  | -4.12301 | 0.077064 |
| C | -2.09813 | -5.15887 | -0.76239 |
| C | -1.32488 | -4.4262  | 1.383299 |
| C | -2.14825 | -6.45769 | -0.28807 |
| H | -2.37665 | -4.95192 | -1.79017 |
| C | -1.37823 | -5.7362  | 1.860484 |

|   |          |          |          |
|---|----------|----------|----------|
| H | -0.99884 | -3.65187 | 2.072038 |
| C | -1.79091 | -6.76493 | 1.019826 |
| H | -2.4704  | -7.2571  | -0.94855 |
| O | 0.185256 | 3.428534 | -2.17562 |
| O | -1.97806 | 0.076326 | -4.35803 |
| C | -0.40941 | 2.207337 | -2.56371 |
| H | 0.330258 | 1.399308 | -2.65124 |
| H | -1.19268 | 1.894922 | -1.85927 |
| C | -1.53939 | 0.478356 | -5.63794 |
| H | -2.10663 | 1.374035 | -5.89087 |
| H | -0.46819 | 0.719065 | -5.63661 |
| C | -14.3721 | -2.03098 | -0.5008  |
| C | -15.2513 | -0.99163 | -0.64206 |
| H | -14.8108 | -3.02618 | -0.51039 |
| C | -16.1841 | 1.161391 | -0.84053 |
| C | -16.6022 | 2.510313 | -0.94577 |
| C | -18.0023 | 2.573869 | -1.10395 |
| C | -17.202  | 0.253962 | -0.91379 |
| C | -16.6954 | -1.10894 | -0.79688 |
| C | -14.9116 | 0.449791 | -0.6685  |
| C | -17.4981 | -2.22404 | -0.83484 |
| O | -13.8122 | 0.955319 | -0.57153 |
| C | -17.028  | -3.55813 | -0.72084 |
| N | -16.6753 | -4.65493 | -0.63071 |
| C | -18.9035 | -2.10382 | -0.99657 |
| N | -20.0476 | -2.00681 | -1.12844 |
| H | -0.86293 | 2.382151 | -3.53863 |
| H | -1.73346 | -0.29428 | -6.39156 |
| H | 0.515413 | 2.239839 | 7.388461 |
| O | 2.481345 | 0.443544 | 6.790449 |
| C | 2.252968 | 0.58441  | 8.175467 |
| H | 2.951451 | -0.08786 | 8.672721 |
| H | 2.441927 | 1.611177 | 8.512362 |
| H | 1.228223 | 0.300663 | 8.445296 |
| H | -1.83605 | -7.79141 | 1.363703 |
| O | -1.00682 | -5.90126 | 3.15039  |
| C | -1.03583 | -7.20556 | 3.687123 |
| H | -0.35725 | -7.87798 | 3.147816 |
| H | -0.70504 | -7.12035 | 4.721706 |
| H | -2.04872 | -7.6265  | 3.667965 |
| C | -18.6581 | 3.79039  | -1.22948 |
| C | -15.8557 | 3.69074  | -0.91392 |
| H | -19.7334 | 3.850491 | -1.35172 |

|    |          |          |          |
|----|----------|----------|----------|
| H  | -14.7789 | 3.655201 | -0.79273 |
| S  | -18.7581 | 0.988033 | -1.11849 |
| C  | -17.9047 | 4.948    | -1.1959  |
| C  | -16.5055 | 4.897915 | -1.03837 |
| Cl | -18.7255 | 6.467777 | -1.35289 |
| Cl | -15.5668 | 6.358183 | -0.99792 |
| C  | 14.07955 | 1.276314 | -0.05904 |
| C  | 15.03884 | 2.241771 | 0.2692   |
| C  | 14.51871 | 0.133338 | -0.73521 |
| C  | 16.36807 | 2.079745 | -0.06771 |
| H  | 14.74251 | 3.123309 | 0.830068 |
| C  | 15.84636 | -0.03454 | -1.07852 |
| H  | 13.80281 | -0.63144 | -1.02483 |
| C  | 16.7936  | 0.939337 | -0.75489 |
| H  | 17.09326 | 2.835789 | 0.216694 |
| H  | 16.15986 | -0.92453 | -1.61679 |
| N  | 18.14455 | 0.744887 | -1.09442 |
| C  | 18.7005  | -0.55688 | -0.93724 |
| C  | 19.16914 | -1.26716 | -2.07741 |
| C  | 18.77157 | -1.12142 | 0.311418 |
| C  | 19.75244 | -2.55105 | -1.88305 |
| C  | 19.32791 | -2.40082 | 0.492102 |
| H  | 18.39749 | -0.55953 | 1.162981 |
| C  | 19.8205  | -3.0945  | -0.5793  |
| H  | 19.37701 | -2.8251  | 1.489723 |
| H  | 20.26399 | -4.07783 | -0.4476  |
| C  | 18.98946 | 1.813527 | -1.45545 |
| C  | 18.49964 | 2.887252 | -2.20523 |
| C  | 20.34229 | 1.79196  | -1.11275 |
| C  | 19.34197 | 3.920403 | -2.5798  |
| H  | 17.45443 | 2.901971 | -2.49949 |
| C  | 21.18037 | 2.824775 | -1.50647 |
| H  | 20.735   | 0.959956 | -0.53602 |
| C  | 20.68846 | 3.897851 | -2.23567 |
| H  | 18.94312 | 4.745474 | -3.16234 |
| H  | 22.22994 | 2.7902   | -1.23023 |
| H  | 21.34643 | 4.706081 | -2.53737 |
| C  | 19.05233 | -0.76135 | -3.39302 |
| C  | 20.22928 | -3.26297 | -3.00853 |
| H  | 18.58247 | 0.20546  | -3.54651 |
| H  | 20.68044 | -4.23923 | -2.85094 |
| C  | 20.1184  | -2.74094 | -4.26794 |
| C  | 19.51495 | -1.48185 | -4.46115 |

|   |          |          |          |
|---|----------|----------|----------|
| H | 20.48613 | -3.29774 | -5.12405 |
| H | 19.41455 | -1.08428 | -5.4662  |

**Table S9:** Cartesian coordinates of **TNPD3**

| <b>Atom</b> | <b>X-axis</b> | <b>Y-axis</b> | <b>Z-axis</b> |
|-------------|---------------|---------------|---------------|
| C           | 1.237842      | 0.120906      | 1.669051      |
| C           | -0.14127      | 0.137101      | 1.662916      |
| C           | -0.79433      | -0.82623      | 0.896235      |
| C           | -0.07947      | -1.78615      | 0.155774      |
| C           | 1.299696      | -1.82048      | 0.185273      |
| C           | 1.952435      | -0.85747      | 0.951448      |
| H           | -0.70258      | 0.889146      | 2.21234       |
| H           | 1.861207      | -2.55863      | -0.38261      |
| C           | -2.19327      | -1.06649      | 0.640151      |
| C           | -2.37224      | -2.09343      | -0.24894      |
| C           | -3.72449      | -2.34801      | -0.57266      |
| C           | -4.56559      | -1.49061      | 0.117126      |
| S           | -3.67722      | -0.37512      | 1.15166       |
| C           | 5.730764      | -0.04504      | 1.535117      |
| C           | 4.894696      | 0.848386      | 2.179169      |
| C           | 3.536056      | 0.524584      | 1.943938      |
| C           | 3.352465      | -0.5776       | 1.15294       |
| S           | 4.837308      | -1.2644       | 0.633022      |
| C           | 7.173496      | -0.11966      | 1.490047      |
| C           | 7.954356      | -1.24697      | 1.417552      |
| S           | 8.172743      | 1.309933      | 1.416637      |
| C           | 9.332033      | -0.97785      | 1.330921      |
| H           | 7.537066      | -2.24717      | 1.459766      |
| C           | 9.636424      | 0.362016      | 1.333381      |
| H           | 10.09406      | -1.74889      | 1.299951      |
| C           | -6.00363      | -1.39292      | 0.115598      |
| C           | -6.77159      | -0.27127      | 0.348099      |
| S           | -7.01906      | -2.79129      | -0.08581      |
| C           | -8.14737      | -0.52227      | 0.343312      |
| H           | -6.33887      | 0.710626      | 0.50259       |
| C           | -8.47572      | -1.84268      | 0.112399      |
| H           | -8.89378      | 0.248555      | 0.500186      |
| C           | 2.19104       | 1.119823      | 2.334285      |
| C           | -1.02732      | -2.67524      | -0.65771      |
| C           | 10.94159      | 0.971867      | 1.229299      |
| C           | 11.40996      | 2.181615      | 1.693782      |
| S           | 12.20219      | 0.089481      | 0.399747      |



|   |          |          |          |
|---|----------|----------|----------|
| C | 12.77656 | 2.378921 | 1.380271 |
| C | 13.36227 | 1.352983 | 0.689554 |
| H | 13.31083 | 3.283536 | 1.6545   |
| C | -9.79232 | -2.39983 | -0.01161 |
| C | -10.1936 | -3.73731 | -0.01957 |
| S | -11.1378 | -1.30786 | -0.16778 |
| C | -11.5759 | -3.84493 | -0.13539 |
| C | -12.2695 | -2.6416  | -0.22358 |
| H | -12.0962 | -4.79845 | -0.14927 |
| C | 10.60905 | 3.191968 | 2.450121 |
| H | 9.985999 | 3.800561 | 1.784155 |
| H | 9.941489 | 2.721827 | 3.178649 |
| H | 11.27084 | 3.874514 | 2.989724 |
| C | -9.2959  | -4.92443 | 0.0998   |
| H | -8.6561  | -5.04434 | -0.78146 |
| H | -8.64019 | -4.85479 | 0.974079 |
| H | -9.88918 | -5.83616 | 0.199826 |
| C | 5.356273 | 1.971442 | 3.049393 |
| H | 6.348985 | 1.777822 | 3.463326 |
| H | 5.402884 | 2.917852 | 2.497281 |
| H | 4.666306 | 2.11769  | 3.885832 |
| C | -4.16929 | -3.3619  | -1.57459 |
| H | -4.27038 | -4.35792 | -1.12694 |
| H | -5.13072 | -3.0961  | -2.02075 |
| H | -3.43759 | -3.44305 | -2.38361 |
| C | 2.085209 | 2.503539 | 1.680249 |
| C | 2.487302 | 3.653906 | 2.348167 |
| C | 1.667815 | 2.600876 | 0.350311 |
| C | 2.458832 | 4.883313 | 1.69589  |
| H | 2.814583 | 3.601773 | 3.381318 |
| C | 1.637352 | 3.831409 | -0.29474 |
| H | 1.362619 | 1.704523 | -0.17744 |
| C | 2.035819 | 4.982682 | 0.385249 |
| H | 2.769372 | 5.778387 | 2.226346 |
| H | 1.999985 | 5.934648 | -0.13463 |
| C | 1.918251 | 1.108674 | 3.8345   |
| C | 0.878892 | 1.871168 | 4.377702 |
| C | 2.626861 | 0.256006 | 4.665677 |
| C | 0.58054  | 1.771766 | 5.724539 |
| H | 0.313188 | 2.550431 | 3.747491 |
| C | 2.324647 | 0.159096 | 6.025262 |
| H | 3.434064 | -0.36153 | 4.280572 |
| C | 1.294583 | 0.922754 | 6.563622 |

|   |          |          |          |
|---|----------|----------|----------|
| H | -0.22524 | 2.36886  | 6.140828 |
| C | -0.68498 | -2.43315 | -2.12766 |
| C | 0.329315 | -3.16253 | -2.75585 |
| C | -1.28365 | -1.3898  | -2.81674 |
| C | 0.711356 | -2.84355 | -4.04659 |
| H | 0.815471 | -3.98179 | -2.2355  |
| C | -0.89119 | -1.06609 | -4.11654 |
| H | -2.06612 | -0.78942 | -2.35963 |
| C | 0.111621 | -1.79955 | -4.74231 |
| H | 1.496973 | -3.41634 | -4.53006 |
| H | 0.430728 | -1.57184 | -5.75237 |
| C | -0.97795 | -4.14151 | -0.22433 |
| C | -1.38416 | -5.16761 | -1.08244 |
| C | -0.62243 | -4.46388 | 1.076752 |
| C | -1.4181  | -6.4754  | -0.63147 |
| H | -1.66393 | -4.94604 | -2.10681 |
| C | -0.65957 | -5.78272 | 1.530172 |
| H | -0.30669 | -3.69892 | 1.780591 |
| C | -1.05818 | -6.80166 | 0.670943 |
| H | -1.72929 | -7.26675 | -1.3068  |
| O | 1.229655 | 4.005204 | -1.57328 |
| O | -1.54236 | -0.0215  | -4.67734 |
| C | 0.8073   | 2.870248 | -2.29893 |
| H | 1.61711  | 2.138431 | -2.41052 |
| H | -0.05266 | 2.381408 | -1.82278 |
| C | -1.18545 | 0.354794 | -5.98967 |
| H | -1.81564 | 1.205041 | -6.24848 |
| H | -0.13251 | 0.656932 | -6.04916 |
| C | -13.6737 | -2.63233 | -0.35174 |
| C | -14.616  | -1.64454 | -0.46871 |
| H | -14.0551 | -3.65081 | -0.36151 |
| C | -15.6785 | 0.449448 | -0.65024 |
| C | -16.1845 | 1.768038 | -0.75561 |
| C | -17.5819 | 1.742605 | -0.90556 |
| C | -16.6402 | -0.51728 | -0.71461 |
| C | -16.05   | -1.84944 | -0.60412 |
| C | -14.3621 | -0.18617 | -0.49249 |
| C | -16.7873 | -3.00849 | -0.63232 |
| O | -13.2945 | 0.383743 | -0.4045  |
| C | -16.2384 | -4.31297 | -0.52594 |
| N | -15.8203 | -5.3869  | -0.44182 |
| C | -18.1995 | -2.97024 | -0.77393 |
| N | -19.3491 | -2.93992 | -0.88929 |

|   |          |          |          |
|---|----------|----------|----------|
| H | 0.511796 | 3.228065 | -3.28491 |
| H | -1.36694 | -0.45714 | -6.70458 |
| H | 1.042692 | 0.868808 | 7.616054 |
| O | 3.090663 | -0.7033  | 6.731091 |
| C | 2.83039  | -0.84497 | 8.110363 |
| H | 3.54402  | -1.57814 | 8.484843 |
| H | 2.973779 | 0.101446 | 8.646288 |
| H | 1.812    | -1.20993 | 8.292317 |
| H | -1.09039 | -7.83463 | 0.996404 |
| O | -0.28731 | -5.96592 | 2.817499 |
| C | -0.29988 | -7.27975 | 3.330903 |
| H | 0.388257 | -7.93356 | 2.780914 |
| H | 0.028303 | -7.20865 | 4.367393 |
| H | -1.30709 | -7.71365 | 3.302602 |
| C | -18.3098 | 2.918314 | -1.03513 |
| C | -15.5236 | 2.998903 | -0.73284 |
| H | -19.3859 | 2.890931 | -1.15324 |
| H | -14.4471 | 3.018937 | -0.61525 |
| S | -18.239  | 0.117744 | -0.90963 |
| C | -17.648  | 4.130964 | -1.01011 |
| C | -16.2372 | 4.171009 | -0.86258 |
| C | 14.74036 | 1.236784 | 0.230285 |
| C | 15.76434 | 1.94501  | 0.869774 |
| C | 15.09357 | 0.427666 | -0.85415 |
| C | 17.07558 | 1.855394 | 0.44563  |
| H | 15.53249 | 2.551092 | 1.740869 |
| C | 16.40205 | 0.336958 | -1.28811 |
| H | 14.32398 | -0.122   | -1.38983 |
| C | 17.41648 | 1.052804 | -0.64724 |
| H | 17.85203 | 2.398154 | 0.97538  |
| H | 16.64757 | -0.28673 | -2.14282 |
| N | 18.74601 | 0.930285 | -1.08658 |
| C | 19.20188 | -0.34859 | -1.51843 |
| C | 19.58146 | -0.54024 | -2.8758  |
| C | 19.26195 | -1.38864 | -0.6256  |
| C | 20.06502 | -1.8197  | -3.27001 |
| C | 19.72013 | -2.65644 | -1.02813 |
| H | 18.95615 | -1.21523 | 0.402618 |
| C | 20.12573 | -2.86381 | -2.31823 |
| H | 19.76304 | -3.46303 | -0.30339 |
| H | 20.49297 | -3.8364  | -2.63481 |
| C | 19.66916 | 1.99298  | -1.00681 |
| C | 19.263   | 3.311054 | -1.23572 |

|   |          |          |          |
|---|----------|----------|----------|
| C | 21.0166  | 1.737982 | -0.7476  |
| C | 20.18201 | 4.345311 | -1.18072 |
| H | 18.22193 | 3.518268 | -1.46501 |
| C | 21.9315  | 2.779844 | -0.71005 |
| H | 21.34444 | 0.717277 | -0.57535 |
| C | 21.52291 | 4.089232 | -0.9191  |
| H | 19.84767 | 5.362501 | -1.36149 |
| H | 22.97554 | 2.561574 | -0.50651 |
| H | 22.24086 | 4.901965 | -0.88404 |
| C | 19.46933 | 0.478722 | -3.85019 |
| C | 20.45152 | -2.0195  | -4.61597 |
| H | 19.07455 | 1.446992 | -3.55739 |
| H | 20.827   | -2.99693 | -4.90767 |
| C | 20.34787 | -1.00998 | -5.53318 |
| C | 19.84285 | 0.24802  | -5.14679 |
| H | 20.64555 | -1.17614 | -6.56367 |
| H | 19.74721 | 1.037092 | -5.88605 |
| C | -15.4533 | 5.45641  | -0.77435 |
| C | -18.4923 | 5.364919 | -1.21093 |
| F | -14.1445 | 5.24199  | -0.92375 |
| F | -15.8076 | 6.337565 | -1.71096 |
| F | -15.6124 | 6.04598  | 0.413766 |
| F | -18.1877 | 6.338033 | -0.35186 |
| F | -18.3525 | 5.857188 | -2.44439 |
| F | -19.791  | 5.100726 | -1.04838 |

**Table S10:** Cartesian coordinates of **TNPD4**

| Atom | X-axis   | Y-axis   | Z-axis   |
|------|----------|----------|----------|
| C    | -0.35046 | -0.55719 | 1.603884 |
| C    | 1.027157 | -0.60497 | 1.586142 |
| C    | 1.701218 | 0.493785 | 1.05732  |
| C    | 1.006345 | 1.615016 | 0.56736  |
| C    | -0.36966 | 1.689004 | 0.646437 |
| C    | -1.04406 | 0.589673 | 1.172836 |
| H    | 1.567633 | -1.48907 | 1.916651 |
| H    | -0.91273 | 2.553829 | 0.272538 |
| C    | 3.10006  | 0.729977 | 0.799505 |
| C    | 3.294139 | 1.901583 | 0.116238 |
| C    | 4.640538 | 2.145181 | -0.24005 |
| C    | 5.462744 | 1.129585 | 0.218928 |
| S    | 4.563218 | -0.12116 | 1.073707 |

|   |          |          |          |
|---|----------|----------|----------|
| C | -4.83863 | -0.2816  | 1.524574 |
| C | -4.02015 | -1.33631 | 1.886279 |
| C | -2.6554  | -0.98459 | 1.747589 |
| C | -2.44985 | 0.294271 | 1.302435 |
| S | -3.92118 | 1.126567 | 1.00196  |
| C | -6.27962 | -0.17494 | 1.510253 |
| C | -7.04475 | 0.942025 | 1.741439 |
| S | -7.30037 | -1.52252 | 1.074508 |
| C | -8.42667 | 0.722154 | 1.599815 |
| H | -6.61302 | 1.891124 | 2.039962 |
| C | -8.75059 | -0.56821 | 1.255583 |
| H | -9.1775  | 1.483996 | 1.77875  |
| C | 6.890368 | 0.961483 | 0.112968 |
| C | 7.59592  | -0.22282 | 0.080182 |
| S | 7.981689 | 2.316729 | 0.127004 |
| C | 8.982839 | -0.04895 | 0.04819  |
| H | 7.110332 | -1.19195 | 0.064777 |
| C | 9.383798 | 1.271664 | 0.057648 |
| H | 9.684199 | -0.87513 | 0.010998 |
| C | -1.32084 | -1.69798 | 1.914644 |
| C | 1.962849 | 2.601264 | -0.11425 |
| C | -10.0646 | -1.11709 | 1.013808 |
| C | -10.5408 | -2.4035  | 1.145992 |
| S | -11.327  | -0.03503 | 0.473761 |
| C | -11.9142 | -2.49898 | 0.815654 |
| C | -12.4979 | -1.3211  | 0.435684 |
| H | -12.4553 | -3.43986 | 0.847114 |
| C | 10.72892 | 1.766356 | -0.01449 |
| C | 11.21061 | 3.065817 | 0.155925 |
| S | 12.00608 | 0.630186 | -0.34154 |
| C | 12.59636 | 3.107321 | 0.033803 |
| C | 13.21565 | 1.889665 | -0.22905 |
| H | 13.17245 | 4.021706 | 0.143937 |
| C | -9.74247 | -3.5865  | 1.590472 |
| H | -9.13374 | -3.99786 | 0.776639 |
| H | -9.06169 | -3.33569 | 2.409625 |
| H | -10.4058 | -4.3841  | 1.935106 |
| C | 10.38762 | 4.275908 | 0.451878 |
| H | 9.711845 | 4.523948 | -0.37397 |
| H | 9.773229 | 4.14248  | 1.348834 |
| H | 11.03484 | 5.140065 | 0.617623 |
| C | -4.5071  | -2.65086 | 2.403176 |
| H | -5.47529 | -2.5527  | 2.900885 |

|   |          |          |          |
|---|----------|----------|----------|
| H | -4.61994 | -3.38663 | 1.59776  |
| H | -3.7987  | -3.06537 | 3.126173 |
| C | 5.093165 | 3.304666 | -1.06468 |
| H | 5.265066 | 4.197933 | -0.45231 |
| H | 6.018938 | 3.082869 | -1.60105 |
| H | 4.331749 | 3.562091 | -1.80682 |
| C | -1.2378  | -2.76889 | 0.814452 |
| C | -1.75118 | -4.04519 | 1.016311 |
| C | -0.72121 | -2.43774 | -0.44088 |
| C | -1.73998 | -4.97258 | -0.02117 |
| H | -2.15094 | -4.32736 | 1.984793 |
| C | -0.69948 | -3.37232 | -1.46943 |
| H | -0.32678 | -1.44323 | -0.61365 |
| C | -1.21804 | -4.64968 | -1.25883 |
| H | -2.13961 | -5.9682  | 0.146321 |
| H | -1.18989 | -5.36651 | -2.07319 |
| C | -1.04417 | -2.21494 | 3.31942  |
| C | -0.06248 | -3.18397 | 3.547706 |
| C | -1.68709 | -1.64294 | 4.406032 |
| C | 0.245124 | -3.56237 | 4.842647 |
| H | 0.450965 | -3.64806 | 2.711245 |
| C | -1.3764  | -2.02834 | 5.71079  |
| H | -2.44728 | -0.87811 | 4.268607 |
| C | -0.40354 | -2.9975  | 5.935098 |
| H | 1.005998 | -4.3178  | 5.014317 |
| C | 1.538473 | 2.607793 | -1.58462 |
| C | 0.562264 | 3.493295 | -2.05006 |
| C | 1.997993 | 1.611914 | -2.43368 |
| C | 0.075068 | 3.368555 | -3.33935 |
| H | 0.180528 | 4.276102 | -1.4024  |
| C | 1.493107 | 1.479724 | -3.72697 |
| H | 2.748334 | 0.896148 | -2.10673 |
| C | 0.525895 | 2.365842 | -4.19043 |
| H | -0.68129 | 4.061358 | -3.69555 |
| H | 0.121844 | 2.287634 | -5.19264 |
| C | 1.995404 | 3.972448 | 0.557557 |
| C | 2.427551 | 5.110362 | -0.13003 |
| C | 1.689547 | 4.085404 | 1.905361 |
| C | 2.535513 | 6.320498 | 0.531998 |
| H | 2.670728 | 5.052702 | -1.18556 |
| C | 1.80207  | 5.305864 | 2.571973 |
| H | 1.356334 | 3.22618  | 2.48069  |
| C | 2.226128 | 6.437076 | 1.882324 |

|   |          |          |          |
|---|----------|----------|----------|
| H | 2.866544 | 7.200488 | -0.01127 |
| O | -0.18603 | -3.12831 | -2.6974  |
| O | 1.99728  | 0.44869  | -4.4459  |
| C | 0.441834 | -1.88459 | -2.93072 |
| H | -0.26807 | -1.04782 | -2.87123 |
| H | 1.261589 | -1.70464 | -2.22171 |
| C | 1.498097 | 0.247057 | -5.75065 |
| H | 2.013948 | -0.62792 | -6.14605 |
| H | 0.417363 | 0.053732 | -5.74016 |
| C | 14.61839 | 1.810661 | -0.35949 |
| C | 15.49711 | 0.789198 | -0.60502 |
| H | 15.06295 | 2.794662 | -0.22865 |
| C | 16.42619 | -1.32613 | -1.06179 |
| C | 16.8425  | -2.65342 | -1.33385 |
| C | 18.25024 | -2.70914 | -1.45148 |
| C | 17.44881 | -0.428   | -0.97799 |
| C | 16.94508 | 0.912795 | -0.694   |
| C | 15.15069 | -0.63186 | -0.83519 |
| C | 17.75576 | 2.013074 | -0.55153 |
| O | 14.04729 | -1.1367  | -0.84192 |
| C | 17.29044 | 3.323088 | -0.26604 |
| N | 16.94156 | 4.399878 | -0.03336 |
| C | 19.1649  | 1.90139  | -0.68495 |
| N | 20.312   | 1.811221 | -0.79388 |
| H | 0.852778 | -1.93153 | -3.93853 |
| H | 1.703211 | 1.107786 | -6.39845 |
| H | -0.14631 | -3.31682 | 6.938019 |
| O | -2.07526 | -1.4028  | 6.684972 |
| C | -1.80331 | -1.75136 | 8.024671 |
| H | -2.46165 | -1.14054 | 8.641576 |
| H | -2.01383 | -2.81092 | 8.215628 |
| H | -0.76104 | -1.53833 | 8.292393 |
| H | 2.31675  | 7.397997 | 2.374619 |
| O | 1.473655 | 5.284676 | 3.883723 |
| C | 1.566541 | 6.490285 | 4.610326 |
| H | 0.897079 | 7.258287 | 4.20352  |
| H | 1.264231 | 6.258776 | 5.631132 |
| H | 2.593162 | 6.876884 | 4.619202 |
| C | 18.9135  | -3.90465 | -1.71921 |
| C | 16.08851 | -3.8178  | -1.48698 |
| H | 19.99333 | -3.93896 | -1.8083  |
| H | 15.00881 | -3.80591 | -1.40183 |
| S | 19.00822 | -1.14511 | -1.22576 |

|   |          |          |          |
|---|----------|----------|----------|
| C | 18.1614  | -5.04921 | -1.86929 |
| C | 16.76944 | -4.98391 | -1.7506  |
| C | -13.882  | -1.07638 | 0.051098 |
| C | -14.9036 | -1.92001 | 0.502201 |
| C | -14.2438 | -0.00692 | -0.77403 |
| C | -16.221  | -1.71094 | 0.144373 |
| H | -14.6641 | -2.73636 | 1.177521 |
| C | -15.5586 | 0.205503 | -1.14145 |
| H | -13.4769 | 0.658376 | -1.16189 |
| C | -16.5709 | -0.64558 | -0.69062 |
| H | -16.9947 | -2.36799 | 0.528669 |
| H | -15.8112 | 1.034334 | -1.79647 |
| N | -17.9065 | -0.40051 | -1.0539  |
| C | -18.3532 | 0.950551 | -1.12236 |
| C | -18.7697 | 1.49266  | -2.36981 |
| C | -18.3709 | 1.722016 | 0.012098 |
| C | -19.2455 | 2.833871 | -2.40084 |
| C | -18.821  | 3.054251 | -0.03103 |
| H | -18.0381 | 1.284152 | 0.949289 |
| C | -19.2617 | 3.593982 | -1.20845 |
| H | -18.8299 | 3.644003 | 0.879882 |
| H | -19.6232 | 4.61807  | -1.24852 |
| C | -18.8452 | -1.4387  | -1.22598 |
| C | -18.467  | -2.65581 | -1.80068 |
| C | -20.181  | -1.24692 | -0.87065 |
| C | -19.4017 | -3.65982 | -1.98971 |
| H | -17.4356 | -2.80656 | -2.10532 |
| C | -21.1122 | -2.25376 | -1.07854 |
| H | -20.4871 | -0.30293 | -0.43002 |
| C | -20.731  | -3.46766 | -1.63197 |
| H | -19.0892 | -4.59829 | -2.43777 |
| H | -22.1469 | -2.08585 | -0.79518 |
| H | -21.4613 | -4.25465 | -1.78843 |
| C | -18.7022 | 0.762764 | -3.57939 |
| C | -19.6697 | 3.380529 | -3.63462 |
| H | -18.3132 | -0.25083 | -3.56245 |
| H | -20.0391 | 4.40269  | -3.64878 |
| C | -19.6091 | 2.644755 | -4.78612 |
| C | -19.1113 | 1.326377 | -4.75792 |
| H | -19.9354 | 3.075995 | -5.72722 |
| H | -19.0496 | 0.757008 | -5.68002 |
| N | 15.99397 | -6.22604 | -1.91548 |
| O | 16.60794 | -7.24649 | -2.14944 |



|   |          |          |          |
|---|----------|----------|----------|
| O | 14.78751 | -6.15714 | -1.80772 |
| H | 18.62821 | -6.00336 | -2.07826 |

**Table S11:** Cartesian coordinates of **TNPD5**

| <b>Atom</b> | <b>X-axis</b> | <b>Y-axis</b> | <b>Z-axis</b> |
|-------------|---------------|---------------|---------------|
| C           | -0.41998      | -0.38734      | 1.714931      |
| C           | 0.958285      | -0.40228      | 1.73556       |
| C           | 1.621448      | 0.655459      | 1.116895      |
| C           | 0.915416      | 1.704357      | 0.499361      |
| C           | -0.46352      | 1.752614      | 0.538961      |
| C           | -1.12682      | 0.695159      | 1.157117      |
| H           | 1.509762      | -1.23561      | 2.164869      |
| H           | -1.01557      | 2.56195       | 0.066774      |
| C           | 3.020855      | 0.898745      | 0.870466      |
| C           | 3.207826      | 2.002276      | 0.080029      |
| C           | 4.556037      | 2.236849      | -0.27351      |
| C           | 5.387131      | 1.284425      | 0.294074      |
| S           | 4.492264      | 0.105802      | 1.251303      |
| C           | -4.90889      | -0.22294      | 1.513806      |
| C           | -4.07857      | -1.2218       | 1.987247      |
| C           | -2.71813      | -0.85468      | 1.842953      |
| C           | -2.52895      | 0.380882      | 1.28285       |
| S           | -4.00987      | 1.150213      | 0.87967       |
| C           | -6.35171      | -0.1518       | 1.460821      |
| C           | -7.15017      | 0.949962      | 1.642068      |
| S           | -7.32305      | -1.53583      | 1.028658      |
| C           | -8.52089      | 0.691122      | 1.465285      |
| H           | -6.75015      | 1.916696      | 1.927917      |
| C           | -8.80314      | -0.61457      | 1.139078      |
| H           | -9.29361      | 1.439822      | 1.601437      |
| C           | 6.815667      | 1.11842       | 0.213147      |
| C           | 7.526628      | -0.0591       | 0.325843      |
| S           | 7.901574      | 2.467904      | 0.047156      |
| C           | 8.911099      | 0.113032      | 0.259477      |
| H           | 7.04563       | -1.02428      | 0.43578       |
| C           | 9.307168      | 1.425716      | 0.096717      |
| H           | 9.615575      | -0.70906      | 0.319997      |
| C           | -1.37347      | -1.51572      | 2.111789      |
| C           | 1.86761       | 2.637509      | -0.25894      |
| C           | -10.0963      | -1.19569      | 0.867974      |
| C           | -10.5197      | -2.5078       | 0.88873       |
| S           | -11.4092      | -0.12409      | 0.436255      |

|   |          |          |          |
|---|----------|----------|----------|
| C | -11.8907 | -2.63064 | 0.559345 |
| C | -12.5269 | -1.44936 | 0.289084 |
| H | -12.3894 | -3.59367 | 0.509013 |
| C | 10.64826 | 1.905672 | -0.06434 |
| C | 11.13386 | 3.216437 | -0.0585  |
| S | 11.91547 | 0.736233 | -0.296   |
| C | 12.51366 | 3.240266 | -0.22632 |
| C | 13.12721 | 1.997791 | -0.36781 |
| H | 13.09186 | 4.159759 | -0.24026 |
| C | -9.67005 | -3.69333 | 1.215034 |
| H | -8.99746 | -3.955   | 0.389678 |
| H | -9.04705 | -3.52067 | 2.098421 |
| H | -10.2974 | -4.56628 | 1.41246  |
| C | 10.31711 | 4.453277 | 0.120228 |
| H | 9.634626 | 4.618084 | -0.7208  |
| H | 9.71097  | 4.41453  | 1.031563 |
| H | 10.96835 | 5.327346 | 0.190365 |
| C | -4.55428 | -2.49025 | 2.617473 |
| H | -5.55152 | -2.37331 | 3.049082 |
| H | -4.59923 | -3.31079 | 1.891388 |
| H | -3.8753  | -2.80038 | 3.417735 |
| C | 5.001232 | 3.322526 | -1.19648 |
| H | 5.157795 | 4.268973 | -0.66512 |
| H | 5.933384 | 3.065959 | -1.70564 |
| H | 4.242244 | 3.503513 | -1.96301 |
| C | -1.23537 | -2.68823 | 1.126869 |
| C | -1.72688 | -3.94999 | 1.44263  |
| C | -0.68777 | -2.4726  | -0.14035 |
| C | -1.66175 | -4.97732 | 0.506281 |
| H | -2.14902 | -4.14318 | 2.423345 |
| C | -0.61135 | -3.50623 | -1.06643 |
| H | -0.31174 | -1.49076 | -0.403   |
| C | -1.10747 | -4.76848 | -0.74182 |
| H | -2.0439  | -5.96072 | 0.762977 |
| H | -1.03632 | -5.56346 | -1.47718 |
| C | -1.12599 | -1.88623 | 3.567502 |
| C | -0.12616 | -2.79961 | 3.915205 |
| C | -1.81761 | -1.23335 | 4.575703 |
| C | 0.151632 | -3.04393 | 5.24842  |
| H | 0.42472  | -3.32591 | 3.141833 |
| C | -1.53717 | -1.48396 | 5.919708 |
| H | -2.5935  | -0.50797 | 4.344398 |
| C | -0.54571 | -2.39773 | 6.263033 |

|   |          |          |          |
|---|----------|----------|----------|
| H | 0.927055 | -3.75656 | 5.512985 |
| C | 1.489995 | 2.468628 | -1.733   |
| C | 0.496407 | 3.258332 | -2.31876 |
| C | 2.015456 | 1.409125 | -2.45752 |
| C | 0.05895  | 2.978756 | -3.60153 |
| H | 0.062754 | 4.08789  | -1.76941 |
| C | 1.561518 | 1.121531 | -3.74456 |
| H | 2.781107 | 0.762881 | -2.03539 |
| C | 0.577584 | 1.912705 | -4.32833 |
| H | -0.71119 | 3.597967 | -4.05143 |
| H | 0.211635 | 1.713905 | -5.32852 |
| C | 1.843163 | 4.074428 | 0.257136 |
| C | 2.250393 | 5.145436 | -0.54351 |
| C | 1.506969 | 4.321827 | 1.579527 |
| C | 2.303543 | 6.42355  | -0.01585 |
| H | 2.515582 | 4.982679 | -1.58263 |
| C | 1.563445 | 5.610722 | 2.110515 |
| H | 1.191853 | 3.518412 | 2.239472 |
| C | 1.962573 | 6.674871 | 1.308159 |
| H | 2.615146 | 7.250797 | -0.64642 |
| O | -0.06295 | -3.3753  | -2.29655 |
| O | 2.131004 | 0.043765 | -4.33442 |
| C | 0.55057  | -2.14846 | -2.63397 |
| H | -0.17573 | -1.3254  | -2.68576 |
| H | 1.340096 | -1.87936 | -1.9188  |
| C | 1.694277 | -0.30797 | -5.62976 |
| H | 2.259104 | -1.19547 | -5.91491 |
| H | 0.622302 | -0.54487 | -5.64031 |
| C | 14.52131 | 1.90159  | -0.54269 |
| C | 15.39224 | 0.854066 | -0.7079  |
| H | 14.96991 | 2.892469 | -0.5434  |
| C | 16.30224 | -1.30287 | -0.95432 |
| C | 16.70719 | -2.65188 | -1.08811 |
| C | 18.10757 | -2.72482 | -1.26003 |
| C | 17.32797 | -0.40632 | -1.02076 |
| C | 16.83236 | 0.962528 | -0.87443 |
| C | 15.03668 | -0.58082 | -0.75537 |
| C | 17.64953 | 2.066962 | -0.90169 |
| O | 13.93585 | -1.08127 | -0.65553 |
| C | 17.19625 | 3.404326 | -0.7601  |
| N | 16.85515 | 4.502548 | -0.64746 |
| C | 19.05122 | 1.929975 | -1.08012 |
| N | 20.19201 | 1.815094 | -1.22579 |

|   |          |          |          |
|---|----------|----------|----------|
| H | 0.999515 | -2.28899 | -3.61655 |
| H | 1.893026 | 0.492025 | -6.35298 |
| H | -0.31102 | -2.61276 | 7.298711 |
| O | -2.2828  | -0.79046 | 6.809483 |
| C | -2.043   | -1.00204 | 8.183556 |
| H | -2.73683 | -0.35591 | 8.720346 |
| H | -2.2299  | -2.04467 | 8.468958 |
| H | -1.01582 | -0.73286 | 8.459041 |
| H | 2.009733 | 7.686175 | 1.694136 |
| O | 1.208923 | 5.720855 | 3.410923 |
| C | 1.242057 | 7.0018   | 4.001062 |
| H | 0.554944 | 7.694158 | 3.499065 |
| H | 0.925013 | 6.872673 | 5.035391 |
| H | 2.25371  | 7.425886 | 3.986359 |
| C | 18.75581 | -3.94262 | -1.41443 |
| C | 15.94666 | -3.82344 | -1.0719  |
| H | 19.82992 | -4.00339 | -1.54671 |
| H | 14.87155 | -3.77438 | -0.941   |
| S | 18.87475 | -1.14947 | -1.25239 |
| C | 17.99334 | -5.09975 | -1.39667 |
| C | 16.58473 | -5.0393  | -1.22527 |
| C | -13.9206 | -1.22916 | -0.07334 |
| C | -14.8933 | -2.19133 | 0.223802 |
| C | -14.3408 | -0.06723 | -0.7288  |
| C | -16.217  | -2.00829 | -0.1239  |
| H | -14.6121 | -3.08787 | 0.768457 |
| C | -15.6628 | 0.121837 | -1.08281 |
| H | -13.6141 | 0.696258 | -0.99397 |
| C | -16.6234 | -0.84918 | -0.7912  |
| H | -16.9529 | -2.76277 | 0.136023 |
| H | -15.961  | 1.026605 | -1.60486 |
| N | -17.9681 | -0.63448 | -1.14229 |
| C | -18.5108 | 0.671808 | -0.97562 |
| C | -18.9467 | 1.405951 | -2.11363 |
| C | -18.6005 | 1.21744  | 0.280174 |
| C | -19.5177 | 2.693997 | -1.91089 |
| C | -19.1446 | 2.500825 | 0.46986  |
| H | -18.251  | 0.637407 | 1.130018 |
| C | -19.6062 | 3.217543 | -0.6002  |
| H | -19.2091 | 2.90995  | 1.472917 |
| H | -20.0401 | 4.204236 | -0.46178 |
| C | -18.8193 | -1.68599 | -1.53738 |
| C | -18.3303 | -2.75148 | -2.29937 |

|   |          |          |          |
|---|----------|----------|----------|
| C | -20.1773 | -1.6539  | -1.2166  |
| C | -19.1789 | -3.76678 | -2.7072  |
| H | -17.2807 | -2.77383 | -2.57693 |
| C | -21.0213 | -2.66858 | -1.64335 |
| H | -20.5694 | -0.82798 | -0.63078 |
| C | -20.5305 | -3.73389 | -2.38467 |
| H | -18.7806 | -4.5856  | -3.29884 |
| H | -22.0748 | -2.62601 | -1.38371 |
| H | -21.1932 | -4.528   | -2.71235 |
| C | -18.8085 | 0.919525 | -3.43447 |
| C | -19.9618 | 3.429723 | -3.03449 |
| H | -18.3478 | -0.05079 | -3.59362 |
| H | -20.4039 | 4.409099 | -2.87075 |
| C | -19.8308 | 2.92632  | -4.29955 |
| C | -19.2393 | 1.66274  | -4.50032 |
| H | -20.1733 | 3.501295 | -5.15411 |
| H | -19.1227 | 1.279876 | -5.50932 |
| C | 15.81992 | -6.24295 | -1.21195 |
| N | 15.20091 | -7.21595 | -1.20134 |
| C | 18.63801 | -6.36084 | -1.55386 |
| N | 19.16204 | -7.38053 | -1.68134 |

**Table S12:** Cartesian coordinates of **TNPD6**

| <b>Atom</b> | <b>X-axis</b> | <b>Y-axis</b> | <b>Z-axis</b> |
|-------------|---------------|---------------|---------------|
| C           | 0.591239      | -1.62557      | 0.606787      |
| C           | 1.964408      | -1.6977       | 0.499497      |
| C           | 2.684793      | -0.512        | 0.630255      |
| C           | 2.041312      | 0.716573      | 0.86947       |
| C           | 0.670257      | 0.783045      | 1.011207      |
| C           | -0.05027      | -0.40181      | 0.878048      |
| H           | 2.468057      | -2.63792      | 0.287357      |
| H           | 0.164658      | 1.727939      | 1.196114      |
| C           | 4.094283      | -0.22476      | 0.52229       |
| C           | 4.343799      | 1.117199      | 0.636596      |
| C           | 5.704772      | 1.467538      | 0.477644      |
| C           | 6.479893      | 0.341894      | 0.257156      |
| S           | 5.520985      | -1.13585      | 0.244659      |
| C           | -3.87598      | -1.20642      | 0.919925      |
| C           | -3.10584      | -2.32251      | 0.650532      |
| C           | -1.72854      | -1.99251      | 0.642272      |
| C           | -1.46664      | -0.67393      | 0.900505      |

|   |          |          |          |
|---|----------|----------|----------|
| S | -2.899   | 0.240824 | 1.144603 |
| C | -5.30947 | -1.05823 | 1.032389 |
| C | -6.00593 | -0.22309 | 1.870623 |
| S | -6.41063 | -1.90642 | -0.02353 |
| C | -7.4003  | -0.27694 | 1.694092 |
| H | -5.51578 | 0.389723 | 2.619292 |
| C | -7.80204 | -1.1529  | 0.714455 |
| H | -8.10382 | 0.290087 | 2.293851 |
| C | 7.90118  | 0.211234 | 0.049817 |
| C | 8.557473 | -0.7496  | -0.68819 |
| S | 9.047685 | 1.252141 | 0.844877 |
| C | 9.952076 | -0.64349 | -0.63523 |
| H | 8.032171 | -1.50275 | -1.26456 |
| C | 10.40538 | 0.398375 | 0.146365 |
| H | 10.62088 | -1.31342 | -1.16415 |
| C | -0.43114 | -2.74503 | 0.386029 |
| C | 3.046545 | 1.874552 | 0.877512 |
| C | -9.14917 | -1.42337 | 0.269438 |
| C | -9.69726 | -2.54494 | -0.31442 |
| S | -10.3553 | -0.17561 | 0.480634 |
| C | -11.0792 | -2.38613 | -0.57848 |
| C | -11.5996 | -1.17464 | -0.2122  |
| H | -11.6732 | -3.16273 | -1.05073 |
| C | 11.77    | 0.799706 | 0.349317 |
| C | 12.30856 | 1.676172 | 1.290255 |
| S | 12.98951 | 0.118513 | -0.68865 |
| C | 13.69363 | 1.761671 | 1.161414 |
| C | 14.25308 | 0.988096 | 0.151812 |
| H | 14.31038 | 2.380384 | 1.807224 |
| C | -8.96083 | -3.80397 | -0.64137 |
| H | -8.37754 | -3.70823 | -1.56479 |
| H | -8.26463 | -4.08852 | 0.153565 |
| H | -9.66388 | -4.62859 | -0.785   |
| C | 11.5445  | 2.42689  | 2.330677 |
| H | 10.89869 | 3.194819 | 1.890517 |
| H | 10.90691 | 1.765323 | 2.926632 |
| H | 12.2329  | 2.930345 | 3.013346 |
| C | -3.64391 | -3.70131 | 0.448124 |
| H | -4.62767 | -3.82133 | 0.908308 |
| H | -3.73962 | -3.94464 | -0.61695 |
| H | -2.9728  | -4.44405 | 0.890368 |
| C | 6.215243 | 2.870841 | 0.47846  |
| H | 6.412644 | 3.230789 | 1.495355 |

|   |          |          |          |
|---|----------|----------|----------|
| H | 7.140215 | 2.965486 | -0.0956  |
| H | 5.476248 | 3.544227 | 0.03429  |
| C | -0.4405  | -3.20273 | -1.07847 |
| C | -0.94383 | -4.44552 | -1.4448  |
| C | -0.02829 | -2.31595 | -2.0764  |
| C | -1.02094 | -4.79634 | -2.78961 |
| H | -1.26941 | -5.14979 | -0.6862  |
| C | -0.10332 | -2.67318 | -3.41743 |
| H | 0.35551  | -1.34168 | -1.79633 |
| C | -0.60386 | -3.92495 | -3.77632 |
| H | -1.41027 | -5.77112 | -3.06747 |
| H | -0.64947 | -4.18667 | -4.82858 |
| C | -0.14791 | -3.85429 | 1.393118 |
| C | 0.818009 | -4.83134 | 1.13091  |
| C | -0.76791 | -3.84254 | 2.632431 |
| C | 1.131708 | -5.76911 | 2.098187 |
| H | 1.313602 | -4.86387 | 0.165582 |
| C | -0.45026 | -4.79087 | 3.606142 |
| H | -1.51494 | -3.09283 | 2.879714 |
| C | 0.505796 | -5.76553 | 3.340195 |
| H | 1.879666 | -6.52748 | 1.887272 |
| C | 2.653035 | 2.780991 | -0.28913 |
| C | 1.700583 | 3.791374 | -0.12516 |
| C | 3.129968 | 2.512233 | -1.56289 |
| C | 1.257939 | 4.507727 | -1.22298 |
| H | 1.307766 | 4.017263 | 0.861204 |
| C | 2.672868 | 3.228608 | -2.66968 |
| H | 3.860129 | 1.725753 | -1.73568 |
| C | 1.732502 | 4.239963 | -2.50237 |
| H | 0.521091 | 5.293815 | -1.08814 |
| H | 1.365645 | 4.814893 | -3.34429 |
| C | 3.131683 | 2.574822 | 2.23422  |
| C | 3.609306 | 3.883553 | 2.349688 |
| C | 2.82912  | 1.87264  | 3.391144 |
| C | 3.763473 | 4.457165 | 3.599501 |
| H | 3.851052 | 4.458387 | 1.462202 |
| C | 2.987792 | 2.451693 | 4.650368 |
| H | 2.462033 | 0.850972 | 3.350226 |
| C | 3.456256 | 3.757027 | 4.760453 |
| H | 4.129511 | 5.476368 | 3.679349 |
| O | 0.291905 | -1.87489 | -4.43615 |
| O | 3.199052 | 2.857887 | -3.85968 |
| C | 0.833521 | -0.60978 | -4.12136 |

|   |          |          |          |
|---|----------|----------|----------|
| H | 0.103932 | 0.0254   | -3.60353 |
| H | 1.734265 | -0.69924 | -3.50024 |
| C | 2.759464 | 3.533464 | -5.0179  |
| H | 3.291488 | 3.085331 | -5.8565  |
| H | 1.679932 | 3.409533 | -5.16984 |
| C | 15.65035 | 0.992136 | -0.06628 |
| C | 16.47847 | 0.361147 | -0.95181 |
| H | 16.1366  | 1.655435 | 0.645442 |
| C | 17.3097  | -0.97489 | -2.71003 |
| C | 17.66702 | -1.80818 | -3.78269 |
| C | 19.01936 | -1.78706 | -3.97351 |
| C | 18.37066 | -0.34124 | -2.10785 |
| C | 17.93059 | 0.500958 | -1.01006 |
| C | 16.06891 | -0.57612 | -2.02565 |
| C | 18.78148 | 1.247283 | -0.22807 |
| O | 14.9443  | -0.94206 | -2.2941  |
| C | 18.37351 | 2.071939 | 0.851377 |
| N | 18.07157 | 2.751726 | 1.736174 |
| C | 20.17973 | 1.229454 | -0.46993 |
| N | 21.31778 | 1.210733 | -0.67205 |
| H | 1.100847 | -0.14454 | -5.06981 |
| H | 2.995536 | 4.603793 | -4.97413 |
| H | 0.767555 | -6.51552 | 4.077061 |
| O | -1.12713 | -4.67713 | 4.771347 |
| C | -0.84729 | -5.60745 | 5.794232 |
| H | -1.48789 | -5.34301 | 6.634926 |
| H | -1.07474 | -6.63317 | 5.478594 |
| H | 0.201494 | -5.55358 | 6.111352 |
| H | 3.58295  | 4.232127 | 5.725976 |
| O | 2.656839 | 1.664037 | 5.698937 |
| C | 2.794253 | 2.196844 | 6.997763 |
| H | 2.154706 | 3.076422 | 7.141995 |
| H | 2.482127 | 1.412864 | 7.686994 |
| H | 3.834674 | 2.470177 | 7.213017 |
| S | 19.86053 | -0.76264 | -2.85946 |
| C | -12.9724 | -0.70122 | -0.33376 |
| C | -14.0342 | -1.61077 | -0.39951 |
| C | -13.2834 | 0.660819 | -0.39217 |
| C | -15.3417 | -1.18374 | -0.52387 |
| H | -13.833  | -2.67488 | -0.31583 |
| C | -14.5883 | 1.095998 | -0.52188 |
| H | -12.4853 | 1.39804  | -0.36459 |
| C | -15.6408 | 0.180082 | -0.59427 |



|   |          |          |          |
|---|----------|----------|----------|
| H | -16.1465 | -1.91157 | -0.55016 |
| H | -14.8018 | 2.159401 | -0.58057 |
| N | -16.9646 | 0.640187 | -0.70404 |
| C | -17.3385 | 1.807111 | 0.022874 |
| C | -17.7222 | 2.982764 | -0.67994 |
| C | -17.3168 | 1.792309 | 1.39464  |
| C | -18.1232 | 4.121957 | 0.073674 |
| C | -17.6937 | 2.929413 | 2.132322 |
| H | -17.01   | 0.882948 | 1.904348 |
| C | -18.101  | 4.064619 | 1.486409 |
| H | -17.6727 | 2.892872 | 3.216698 |
| H | -18.4057 | 4.943716 | 2.047936 |
| C | -17.9566 | -0.07325 | -1.40725 |
| C | -17.643  | -0.76429 | -2.5816  |
| C | -19.281  | -0.05841 | -0.96707 |
| C | -18.6295 | -1.44094 | -3.27911 |
| H | -16.6209 | -0.76091 | -2.9482  |
| C | -20.2639 | -0.72697 | -1.68187 |
| H | -19.5374 | 0.480555 | -0.06005 |
| C | -19.9471 | -1.4275  | -2.83687 |
| H | -18.3665 | -1.97183 | -4.18915 |
| H | -21.2885 | -0.70413 | -1.32311 |
| H | -20.7179 | -1.95338 | -3.39045 |
| C | -17.6922 | 3.07212  | -2.09112 |
| C | -18.5125 | 5.294719 | -0.61471 |
| H | -17.3607 | 2.213134 | -2.66676 |
| H | -18.8247 | 6.157747 | -0.0323  |
| C | -18.489  | 5.346783 | -1.98137 |
| C | -18.0655 | 4.226654 | -2.72493 |
| H | -18.7878 | 6.253236 | -2.49832 |
| H | -18.033  | 4.28394  | -3.80841 |
| H | 16.97512 | -2.38877 | -4.37915 |
| H | 19.59672 | -2.32083 | -4.7164  |

**Table S13:** Natural bond orbitals (NBOs) analysis of TNPR

| Donor( <i>i</i> ) | Type  | Acceptor( <i>j</i> ) | Type    | <i>E</i> (2)<br>[kcal/mol] | <i>E</i> ( <i>j</i> )- <i>E</i> ( <i>i</i> )<br>[a.u.] | <i>F</i> ( <i>i,j</i> )<br>[a.u.] |
|-------------------|-------|----------------------|---------|----------------------------|--------------------------------------------------------|-----------------------------------|
| C38-C39           | $\pi$ | C112-C113            | $\pi^*$ | 31.17                      | 0.31                                                   | 0.088                             |
| C44-C45           | $\pi$ | C109-C110            | $\pi^*$ | 31.13                      | 0.31                                                   | 0.088                             |
| C109C110          | $\pi$ | C135-C139            | $\pi^*$ | 26.97                      | 0.3                                                    | 0.081                             |
| C78-C80           | $\pi$ | C74-C76              | $\pi^*$ | 25.23                      | 0.31                                                   | 0.079                             |
| C41-C42           | $\pi$ | C44-C45              | $\pi^*$ | 24.78                      | 0.29                                                   | 0.078                             |
| C66-C70           | $\pi$ | C65-C68              | $\pi^*$ | 24.04                      | 0.29                                                   | 0.077                             |

|           |          |           |            |       |      |       |
|-----------|----------|-----------|------------|-------|------|-------|
| C73-C75   | $\pi$    | C78-C80   | $\pi^*$    | 23.91 | 0.3  | 0.077 |
| C112-C113 | $\pi$    | C137-O142 | $\pi^*$    | 23.72 | 0.31 | 0.078 |
| C117-C118 | $\pi$    | C119-C120 | $\pi^*$    | 22.29 | 0.3  | 0.073 |
| C127-C128 | $\pi$    | C125-C126 | $\pi^*$    | 21.92 | 0.3  | 0.073 |
| C119-C120 | $\pi$    | C117-C118 | $\pi^*$    | 20.85 | 0.3  | 0.072 |
| C26-C27   | $\pi$    | C29-C31   | $\pi^*$    | 19.61 | 0.3  | 0.072 |
| C119-C120 | $\pi$    | C135-C139 | $\pi^*$    | 18.59 | 0.29 | 0.066 |
| C74-C76   | $\pi$    | C78-C80   | $\pi^*$    | 17.57 | 0.29 | 0.065 |
| C136-O141 | $\pi$    | C115-C116 | $\pi^*$    | 4.09  | 0.44 | 0.041 |
| C82-C84   | $\pi$    | C4-C5     | $\pi^*$    | 1.16  | 0.31 | 0.017 |
| C16-C17   | $\pi$    | C63-C64   | $\pi^*$    | 0.79  | 0.33 | 0.015 |
| C109-H111 | $\sigma$ | S43-C45   | $\sigma^*$ | 10.29 | 0.73 | 0.077 |
| C140-C149 | $\sigma$ | C149-N150 | $\sigma^*$ | 8.17  | 1.61 | 0.103 |
| C143-N144 | $\sigma$ | C139-C143 | $\sigma^*$ | 7.99  | 1.57 | 0.101 |
| C109-H111 | $\sigma$ | C110-C136 | $\sigma^*$ | 6.82  | 0.99 | 0.074 |
| C11-C12   | $\sigma$ | C12-C26   | $\sigma^*$ | 6.27  | 1.25 | 0.079 |
| C29-C31   | $\sigma$ | C31-C41   | $\sigma^*$ | 5.98  | 1.27 | 0.078 |
| C44-H46   | $\sigma$ | S43-C45   | $\sigma^*$ | 5.18  | 0.74 | 0.055 |
| C76-C80   | $\sigma$ | C78-O154  | $\sigma^*$ | 4.98  | 1.09 | 0.066 |
| C70-H72   | $\sigma$ | C64-C66   | $\sigma^*$ | 3.98  | 1.11 | 0.059 |
| C115-C120 | $\sigma$ | C136-O141 | $\sigma^*$ | 2.94  | 1.29 | 0.055 |
| C92-C94   | $\sigma$ | C94-H98   | $\sigma^*$ | 1.99  | 1.12 | 0.042 |
| C29-H32   | $\sigma$ | C29-C31   | $\sigma^*$ | 1.69  | 1.11 | 0.039 |
| C125C126  | $\sigma$ | C125-H131 | $\sigma^*$ | 1.66  | 1.15 | 0.039 |
| C95-C99   | $\sigma$ | C99-H159  | $\sigma^*$ | 1.57  | 1.13 | 0.038 |
| C103-H105 | $\sigma$ | C68-O101  | $\sigma^*$ | 0.52  | 0.91 | 0.020 |
| C59-H60   | $\sigma$ | C10-C11   | $\sigma^*$ | 0.50  | 1.07 | 0.021 |
| O154      | LP(2)    | C78-C80   | $\pi^*$    | 33.27 | 0.36 | 0.104 |
| O102      | LP(2)    | C87-C89   | $\pi^*$    | 33.13 | 0.36 | 0.104 |
| S37       | LP(2)    | C35-C36   | $\pi^*$    | 26.52 | 0.27 | 0.076 |
| S18       | LP(2)    | C14-C15   | $\pi^*$    | 21.11 | 0.29 | 0.07  |
| O141      | LP(2)    | C115-C136 | $\sigma^*$ | 20.82 | 0.76 | 0.114 |
| N148      | LP(1)    | C140-C147 | $\sigma^*$ | 12.64 | 1.04 | 0.103 |
| S28       | LP(1)    | C51-H54   | $\sigma^*$ | 0.51  | 1.06 | 0.021 |

LP = lone pair, (i) donor; (j) acceptor;  $E(2)$  means energy of hyper conjugative interaction (stabilization energy), Unit in *kcal/mol*;  $E(j) - E(i)$  is the energy difference between donor and acceptor i and j NBO orbitals;  $F(i, j)$  is the Fock matrix element between i and j NBO orbitals

**Table S14:** Natural bond orbitals analysis for **TNPD1** with its representative values

| Donor( <i>i</i> ) | Type  | Acceptor( <i>j</i> ) | Type    | $E(2)$<br>[ <i>kcal/mol</i> ] | $E(j)-E(i)$<br>[ <i>a.u</i> ] | $F(i,j)$<br>[ <i>a.u</i> ] |
|-------------------|-------|----------------------|---------|-------------------------------|-------------------------------|----------------------------|
| C44-C45           | $\pi$ | C109-C110            | $\pi^*$ | 30.87                         | 0.31                          | 0.088                      |
| C5-C6             | $\pi$ | C3-C4                | $\pi^*$ | 25.63                         | 0.3                           | 0.079                      |
| C63-C64           | $\pi$ | C66-C70              | $\pi^*$ | 24.63                         | 0.3                           | 0.077                      |
| C150-C152         | $\pi$ | C145-C147            | $\pi^*$ | 23.95                         | 0.3                           | 0.077                      |

|           |          |           |            |       |      |       |
|-----------|----------|-----------|------------|-------|------|-------|
| C1-C2     | $\pi$    | C3-C4     | $\pi^*$    | 22.05 | 0.3  | 0.075 |
| C112-C115 | $\pi$    | C116-C118 | $\pi^*$    | 21.56 | 0.32 | 0.075 |
| C5-C6     | $\pi$    | C1-C2     | $\pi^*$    | 20.68 | 0.3  | 0.072 |
| C9-C10    | $\pi$    | C3-C4     | $\pi^*$    | 14.09 | 0.32 | 0.063 |
| C38-C39   | $\pi$    | C145-C147 | $\pi^*$    | 12.03 | 0.32 | 0.058 |
| C14-C15   | $\pi$    | C19-C20   | $\pi^*$    | 10.74 | 0.31 | 0.053 |
| C116-C118 | $\pi$    | C109-C110 | $\pi^*$    | 7.79  | 0.34 | 0.046 |
| C117-O119 | $\pi$    | C112-C115 | $\pi^*$    | 4.86  | 0.42 | 0.044 |
| C117-O119 | $\pi$    | C109-C110 | $\pi^*$    | 3.62  | 0.43 | 0.038 |
| C63-C64   | $\pi$    | C16-C17   | $\pi^*$    | 1.32  | 0.29 | 0.018 |
| C73-C75   | $\pi$    | C1-C2     | $\pi^*$    | 0.84  | 0.3  | 0.014 |
| C122-N123 | $\pi$    | C120-N121 | $\pi^*$    | 0.64  | 0.47 | 0.015 |
| C120-N121 | $\pi$    | C122-N123 | $\pi^*$    | 0.63  | 0.47 | 0.015 |
| C109-H111 | $\sigma$ | S43-C45   | $\sigma^*$ | 10.01 | 0.73 | 0.076 |
| C144-C184 | $\sigma$ | C184-N185 | $\sigma^*$ | 8.88  | 1.61 | 0.107 |
| C3-C4     | $\sigma$ | C9-S13    | $\sigma^*$ | 7.39  | 0.91 | 0.073 |
| C14-C15   | $\sigma$ | C16-C33   | $\sigma^*$ | 6.69  | 1.14 | 0.078 |
| C14-C19   | $\sigma$ | C14-C15   | $\sigma^*$ | 6.55  | 1.31 | 0.083 |
| C29-C31   | $\sigma$ | C31-C41   | $\sigma^*$ | 5.98  | 1.27 | 0.078 |
| C27-H30   | $\sigma$ | C26-S28   | $\sigma^*$ | 5.68  | 0.74 | 0.058 |
| C65-C68   | $\sigma$ | C68-C70   | $\sigma^*$ | 5.29  | 1.29 | 0.074 |
| C139-H141 | $\sigma$ | C113-C114 | $\sigma^*$ | 4.99  | 1.06 | 0.065 |
| C55-H56   | $\sigma$ | C15-C16   | $\sigma^*$ | 4.46  | 1.07 | 0.062 |
| C74-H77   | $\sigma$ | C76-C80   | $\sigma^*$ | 3.99  | 1.11 | 0.059 |
| C44-H46   | $\sigma$ | C41-C42   | $\sigma^*$ | 3.38  | 1.1  | 0.055 |
| C51-H53   | $\sigma$ | C42-C44   | $\sigma^*$ | 2.44  | 1.08 | 0.046 |
| C12-C26   | $\sigma$ | C10-C11   | $\sigma^*$ | 2.05  | 1.3  | 0.046 |
| C115-S142 | $\sigma$ | C110-C116 | $\sigma^*$ | 1.44  | 1.2  | 0.037 |
| C97-O133  | $\sigma$ | C95-C99   | $\sigma^*$ | 1.03  | 1.52 | 0.035 |
| C150-H154 | $\sigma$ | C152-N155 | $\sigma^*$ | 0.93  | 0.95 | 0.027 |
| C12-S13   | $\sigma$ | C10-C34   | $\sigma^*$ | 0.57  | 1.07 | 0.022 |
| C4-C34    | $\sigma$ | C82-C84   | $\sigma^*$ | 0.52  | 1.21 | 0.022 |
| C120-N121 | $\sigma$ | C116-C118 | $\sigma^*$ | 0.5   | 1.65 | 0.026 |
| O127      | LP(2)    | C78-C80   | $\pi^*$    | 33.18 | 0.36 | 0.104 |
| S43       | LP(2)    | C41-C42   | $\pi^*$    | 26.06 | 0.27 | 0.076 |
| N155      | LP(1)    | C156-C158 | $\pi^*$    | 5.27  | 0.3  | 0.036 |
| O119      | LP(2)    | C112-C117 | $\sigma^*$ | 21.58 | 0.75 | 0.116 |
| O102      | LP(1)    | C87-C89   | $\sigma^*$ | 7.36  | 1.14 | 0.082 |
| S43       | LP(1)    | C45-C109  | $\sigma^*$ | 0.55  | 1.21 | 0.023 |

LP = lone pair, (i) donor; (j) acceptor;  $E^{(2)}$  means energy of hyper conjugative interaction (stabilization energy), Unit in *kcal/mol*;  $E(j) - E(i)$  is the energy difference between donor and acceptor i and j NBO orbitals;  $F(i, j)$  is the Fock matrix element between i and j NBO orbitals

**Table S15:** Natural bond orbitals analysis for **TNPD2** with its representative values

| Donor( <i>i</i> ) | Type | Acceptor( <i>j</i> ) | Type | $E^{(2)}$ | $E(j)-E(i)$ | $F(i,j)$ |
|-------------------|------|----------------------|------|-----------|-------------|----------|
|-------------------|------|----------------------|------|-----------|-------------|----------|

|           |          |           |            | [kcal/mol] | [a.u.] | [a.u.] |
|-----------|----------|-----------|------------|------------|--------|--------|
| C44-C45   | $\pi$    | C109-C110 | $\pi^*$    | 30.53      | 0.31   | 0.087  |
| C113-C139 | $\pi$    | C143-C144 | $\pi^*$    | 26.26      | 0.25   | 0.074  |
| C78-C80   | $\pi$    | C74-C76   | $\pi^*$    | 25.35      | 0.31   | 0.079  |
| C63-C64   | $\pi$    | C66-C70   | $\pi^*$    | 24.64      | 0.3    | 0.077  |
| C152-C154 | $\pi$    | C147-C149 | $\pi^*$    | 23.93      | 0.3    | 0.076  |
| C147-C149 | $\pi$    | C148-C150 | $\pi^*$    | 21.97      | 0.3    | 0.073  |
| C112-C115 | $\pi$    | C117-O119 | $\pi^*$    | 20.84      | 0.33   | 0.075  |
| C3-C4     | $\pi$    | C1-C2     | $\pi^*$    | 19.89      | 0.3    | 0.07   |
| C179-C182 | $\pi$    | C178-C183 | $\pi^*$    | 18.75      | 0.31   | 0.069  |
| C63-C64   | $\pi$    | C65-C68   | $\pi^*$    | 17.98      | 0.29   | 0.066  |
| C11-C12   | $\pi$    | C26-C27   | $\pi^*$    | 13.22      | 0.3    | 0.059  |
| C14-C15   | $\pi$    | C19-C20   | $\pi^*$    | 10.41      | 0.31   | 0.053  |
| C117-O119 | $\pi$    | C112-C115 | $\pi^*$    | 4.84       | 0.42   | 0.044  |
| C117-O119 | $\pi$    | C109-C110 | $\pi^*$    | 3.63       | 0.43   | 0.038  |
| C1-C2     | $\pi$    | C73-C75   | $\pi^*$    | 0.88       | 0.31   | 0.015  |
| C167-C169 | $\pi$    | C158-C160 | $\pi^*$    | 0.66       | 0.3    | 0.013  |
| C120-N121 | $\pi$    | C122-N123 | $\pi^*$    | 0.63       | 0.47   | 0.015  |
| C109-H111 | $\sigma$ | S43-C45   | $\sigma^*$ | 9.97       | 0.73   | 0.076  |
| C118-C120 | $\sigma$ | C120-N121 | $\sigma^*$ | 8.34       | 1.62   | 0.104  |
| C109-H111 | $\sigma$ | C110-C117 | $\sigma^*$ | 7.19       | 0.97   | 0.075  |
| C36-C38   | $\sigma$ | C24-C35   | $\sigma^*$ | 6.07       | 1.21   | 0.077  |
| C41-S43   | $\sigma$ | S28-C31   | $\sigma^*$ | 5.87       | 0.87   | 0.064  |
| C47-H50   | $\sigma$ | C35-C36   | $\sigma^*$ | 5.41       | 1.1    | 0.069  |
| C95-C99   | $\sigma$ | C97-O133  | $\sigma^*$ | 4.98       | 1.09   | 0.066  |
| C59-H61   | $\sigma$ | C10-C11   | $\sigma^*$ | 4.44       | 1.07   | 0.062  |
| C70-H72   | $\sigma$ | C64-C66   | $\sigma^*$ | 3.98       | 1.11   | 0.059  |
| C115-S142 | $\sigma$ | C114-C138 | $\sigma^*$ | 3.66       | 1.28   | 0.061  |
| C112-C115 | $\sigma$ | C117-O119 | $\sigma^*$ | 2.95       | 1.33   | 0.056  |
| C182-C183 | $\sigma$ | C178-H180 | $\sigma^*$ | 2.84       | 1.12   | 0.05   |
| C14-C15   | $\sigma$ | C19-C20   | $\sigma^*$ | 2.15       | 1.31   | 0.048  |
| S43-C45   | $\sigma$ | C109-H111 | $\sigma^*$ | 1.95       | 1.07   | 0.041  |
| N157-C167 | $\sigma$ | C168-C170 | $\sigma^*$ | 1.38       | 1.38   | 0.039  |
| C34-C82   | $\sigma$ | C3-C4     | $\sigma^*$ | 1.07       | 1.19   | 0.032  |
| C1-C2     | $\sigma$ | C16-C33   | $\sigma^*$ | 0.81       | 1.14   | 0.027  |
| C1-C33    | $\sigma$ | C73-C75   | $\sigma^*$ | 0.58       | 1.21   | 0.024  |
| C10-C34   | $\sigma$ | C92-C94   | $\sigma^*$ | 0.52       | 1.22   | 0.023  |
| C120-N121 | $\sigma$ | C116-C118 | $\sigma^*$ | 0.5        | 1.65   | 0.026  |
| O127      | LP(2)    | C78-C80   | $\pi^*$    | 33.17      | 0.36   | 0.078  |
| S28       | LP(2)    | C29-C31   | $\pi^*$    | 23.35      | 0.28   | 0.104  |
| N157      | LP(1)    | C158-C160 | $\pi^*$    | 5.52       | 0.3    | 0.082  |
| O119      | LP(2)    | C112-C117 | $\sigma^*$ | 21.51      | 0.76   | 0.115  |
| O101      | LP(2)    | C103-H105 | $\sigma^*$ | 5.76       | 0.69   | 0.058  |
| Cl145     | LP(2)    | C114-C138 | $\sigma^*$ | 0.53       | 0.9    | 0.02   |

LP = lone pair, (i) donor; (j) acceptor;  $E(2)$  means energy of hyper conjugative interaction (stabilization energy), Unit in  $kcal/mol$ ;  $E(j) - E(i)$  is the energy difference between donor and acceptor i and j NBO orbitals;  $F(i, j)$  is the Fock matrix element between i and j NBO orbitals

**Table S16:** Natural bond orbitals analysis for **TNPD3** with its representative values

| Donor(i)  | Type     | Acceptor(j) | Type       | $E(2)$<br>[ $kcal/mol$ ] | $E(j)-E(i)$<br>[ $a.u$ ] | $F(i,j)$<br>[ $a.u$ ] |
|-----------|----------|-------------|------------|--------------------------|--------------------------|-----------------------|
| C44-C45   | $\pi$    | C109-C110   | $\pi^*$    | 31.36                    | 0.31                     | 0.088                 |
| C109-C110 | $\pi$    | C116-C118   | $\pi^*$    | 26.83                    | 0.29                     | 0.080                 |
| C5-C6     | $\pi$    | C3-C 4      | $\pi^*$    | 25.61                    | 0.30                     | 0.078                 |
| C87-C89   | $\pi$    | C83-C85     | $\pi^*$    | 25.21                    | 0.31                     | 0.079                 |
| C41-C42   | $\pi$    | C44-C45     | $\pi^*$    | 24.70                    | 0.29                     | 0.078                 |
| C66-C70   | $\pi$    | C65-C68     | $\pi^*$    | 23.98                    | 0.3                      | 0.077                 |
| C166-C168 | $\pi$    | C165-C167   | $\pi^*$    | 22.92                    | 0.29                     | 0.075                 |
| C146-C148 | $\pi$    | C150-C152   | $\pi^*$    | 21.99                    | 0.30                     | 0.074                 |
| C170-C172 | $\pi$    | C165-C167   | $\pi^*$    | 20.63                    | 0.29                     | 0.070                 |
| C3-C4     | $\pi$    | C1-C2       | $\pi^*$    | 19.83                    | 0.30                     | 0.070                 |
| C113-C114 | $\pi$    | C139-C144   | $\pi^*$    | 18.75                    | 0.31                     | 0.070                 |
| C156-C158 | $\pi$    | C160-C162   | $\pi^*$    | 17.97                    | 0.32                     | 0.068                 |
| C109-C110 | $\pi$    | C44-C45     | $\pi^*$    | 11.13                    | 0.30                     | 0.054                 |
| C116-C118 | $\pi$    | C112-C115   | $\pi^*$    | 9.36                     | 0.32                     | 0.050                 |
| C117-O119 | $\pi$    | C112-C115   | $\pi^*$    | 4.83                     | 0.42                     | 0.044                 |
| C122-N123 | $\pi$    | C120-N121   | $\pi^*$    | 0.64                     | 0.47                     | 0.015                 |
| C65-C68   | $\pi$    | C65-C68     | $\pi^*$    | 0.62                     | 0.30                     | 0.012                 |
| C109-H111 | $\sigma$ | S43-C45     | $\sigma^*$ | 10.06                    | 0.73                     | 0.077                 |
| C118-C120 | $\sigma$ | C120-N121   | $\sigma^*$ | 8.35                     | 1.62                     | 0.104                 |
| C109-H111 | $\sigma$ | C110-C117   | $\sigma^*$ | 7.18                     | 0.97                     | 0.075                 |
| C24-C35   | $\sigma$ | C35-C36     | $\sigma^*$ | 6.88                     | 1.32                     | 0.085                 |
| C31-C41   | $\sigma$ | C41-C42     | $\sigma^*$ | 6.00                     | 1.31                     | 0.079                 |
| C19-C20   | $\sigma$ | C14-C19     | $\sigma^*$ | 5.96                     | 1.26                     | 0.077                 |
| C29-H32   | $\sigma$ | S28-C31     | $\sigma^*$ | 5.67                     | 0.74                     | 0.058                 |
| C41-S43   | $\sigma$ | C42-C51     | $\sigma^*$ | 5.31                     | 1.11                     | 0.069                 |
| C139-H141 | $\sigma$ | C143-C144   | $\sigma^*$ | 5.28                     | 1.06                     | 0.067                 |
| C39-C145  | $\sigma$ | C38-C39     | $\sigma^*$ | 4.99                     | 1.30                     | 0.072                 |
| C55-H56   | $\sigma$ | C15-C16     | $\sigma^*$ | 4.47                     | 1.07                     | 0.062                 |
| C70-H72   | $\sigma$ | C64-C66     | $\sigma^*$ | 3.98                     | 1.11                     | 0.059                 |
| C114-S142 | $\sigma$ | C113-C139   | $\sigma^*$ | 3.94                     | 1.25                     | 0.063                 |
| C181-H183 | $\sigma$ | C177-C180   | $\sigma^*$ | 3.61                     | 1.14                     | 0.057                 |
| C19-C20   | $\sigma$ | C14-C15     | $\sigma^*$ | 2.99                     | 1.32                     | 0.056                 |
| C73-C75   | $\sigma$ | C75-H79     | $\sigma^*$ | 2.02                     | 1.12                     | 0.043                 |
| C65-C68   | $\sigma$ | C70-H72     | $\sigma^*$ | 1.98                     | 1.14                     | 0.042                 |
| C120-N121 | $\sigma$ | C116-C118   | $\sigma^*$ | 0.50                     | 1.65                     | 0.026                 |
| O127      | LP(2)    | C78-C80     | $\pi^*$    | 33.20                    | 0.36                     | 0.104                 |
| S142      | LP(2)    | C112-C115   | $\pi^*$    | 27.02                    | 0.28                     | 0.078                 |
| S13       | LP(2)    | C9-C10      | $\pi^*$    | 26.52                    | 0.29                     | 0.078                 |
| F187      | LP(2)    | C139-C144   | $\pi^*$    | 0.51                     | 0.48                     | 0.015                 |

|      |       |           |            |       |      |       |
|------|-------|-----------|------------|-------|------|-------|
| O119 | LP(2) | C112-C117 | $\sigma^*$ | 21.74 | 0.75 | 0.116 |
| O101 | LP(1) | C65-C68   | $\sigma^*$ | 7.46  | 1.15 | 0.083 |
| F186 | LP(2) | C113-C139 | $\sigma^*$ | 0.50  | 1.02 | 0.020 |

LP = lone pair, (i) donor; (j) acceptor;  $E(2)$  means energy of hyper conjugative interaction (stabilization energy), Unit in *kcal/mol*;  $E(j) - E(i)$  is the energy difference between donor and acceptor i and j NBO orbitals;  $F(i, j)$  is the Fock matrix element between i and j NBO orbitals

**Table S17:** Natural bond orbitals analysis for **TNPD4** with its representative values

| Donor(i)  | Type     | Acceptor(j) | Type       | $E(2)$<br>[ <i>kcal/mol</i> ] | $E(j)-E(i)$<br>[ <i>a.u</i> ] | $F(i,j)$<br>[ <i>a.u</i> ] |
|-----------|----------|-------------|------------|-------------------------------|-------------------------------|----------------------------|
| C44-C45   | $\pi$    | C109-C110   | $\pi^*$    | 31.01                         | 0.31                          | 0.088                      |
| C143-C144 | $\pi$    | N184-O186   | $\pi^*$    | 30.58                         | 0.15                          | 0.065                      |
| C109-C110 | $\pi$    | C116-C118   | $\pi^*$    | 26.48                         | 0.30                          | 0.080                      |
| C143-C144 | $\pi$    | C113-C139   | $\pi^*$    | 25.78                         | 0.31                          | 0.079                      |
| C83-C85   | $\pi$    | C82-C84     | $\pi^*$    | 24.75                         | 0.30                          | 0.078                      |
| C165-C167 | $\pi$    | C170-C172   | $\pi^*$    | 23.80                         | 0.30                          | 0.076                      |
| C113-C139 | $\pi$    | C114-C138   | $\pi^*$    | 22.99                         | 0.28                          | 0.072                      |
| C145-C147 | $\pi$    | C150-C152   | $\pi^*$    | 21.83                         | 0.29                          | 0.071                      |
| C5-C6     | $\pi$    | C1-C2       | $\pi^*$    | 20.68                         | 0.30                          | 0.072                      |
| C3-C4     | $\pi$    | C1-C2       | $\pi^*$    | 19.87                         | 0.30                          | 0.070                      |
| C66-C70   | $\pi$    | C63-C64     | $\pi^*$    | 18.34                         | 0.30                          | 0.068                      |
| C156-C158 | $\pi$    | C160-C162   | $\pi^*$    | 17.98                         | 0.32                          | 0.068                      |
| C11-C12   | $\pi$    | C9-C10      | $\pi^*$    | 16.71                         | 0.32                          | 0.068                      |
| C35-C36   | $\pi$    | C38-C 39    | $\pi^*$    | 15.67                         | 0.31                          | 0.065                      |
| C22-C24   | $\pi$    | C35-C36     | $\pi^*$    | 11.78                         | 0.32                          | 0.058                      |
| C92-C94   | $\pi$    | C9-C10      | $\pi^*$    | 1.37                          | 0.29                          | 0.018                      |
| C120-N121 | $\pi$    | C122-N123   | $\pi^*$    | 0.63                          | 0.47                          | 0.015                      |
| C109-H111 | $\sigma$ | S43-C45     | $\sigma^*$ | 10.01                         | 0.73                          | 0.076                      |
| C118-C120 | $\sigma$ | C120-N121   | $\sigma^*$ | 8.34                          | 1.62                          | 0.104                      |
| C3-C4     | $\sigma$ | C9-S13      | $\sigma^*$ | 7.39                          | 0.91                          | 0.073                      |
| C1-C6     | $\sigma$ | C17-S18     | $\sigma^*$ | 7.36                          | 0.91                          | 0.073                      |
| C109-H111 | $\sigma$ | C110-C117   | $\sigma^*$ | 7.18                          | 0.97                          | 0.075                      |
| C11-C12   | $\sigma$ | C10-C34     | $\sigma^*$ | 6.64                          | 1.15                          | 0.078                      |
| C158-H161 | $\sigma$ | C156-C157   | $\sigma^*$ | 5.84                          | 1.08                          | 0.071                      |
| C39-C145  | $\sigma$ | C38-C39     | $\sigma^*$ | 4.99                          | 1.30                          | 0.072                      |
| C139-C144 | $\sigma$ | C113-C139   | $\sigma^*$ | 3.89                          | 1.31                          | 0.064                      |
| C94-C97   | $\sigma$ | O133-C134   | $\sigma^*$ | 3.64                          | 1.01                          | 0.054                      |
| C22-C24   | $\sigma$ | C20-C22     | $\sigma^*$ | 3.63                          | 1.29                          | 0.061                      |
| C181-H183 | $\sigma$ | C177-C180   | $\sigma^*$ | 3.61                          | 1.14                          | 0.057                      |
| C170-C172 | $\sigma$ | C167-C170   | $\sigma^*$ | 3.47                          | 1.30                          | 0.060                      |
| C4-C34    | $\sigma$ | C4-C5       | $\sigma^*$ | 2.99                          | 1.21                          | 0.054                      |
| C148-C152 | $\sigma$ | N155-C156   | $\sigma^*$ | 2.92                          | 1.12                          | 0.051                      |
| C165-C166 | $\sigma$ | N155-C165   | $\sigma^*$ | 2.01                          | 1.14                          | 0.043                      |
| C112-C117 | $\sigma$ | C117-O119   | $\sigma^*$ | 1.99                          | 1.26                          | 0.045                      |

|           |          |           |            |       |      |       |
|-----------|----------|-----------|------------|-------|------|-------|
| C120-N121 | $\sigma$ | C116-C118 | $\sigma^*$ | 0.50  | 1.65 | 0.026 |
| O127      | LP(2)    | C78-C80   | $\pi^*$    | 33.17 | 0.36 | 0.104 |
| O102      | LP(2)    | C87-C89   | $\pi^*$    | 32.36 | 0.36 | 0.103 |
| N155      | LP(1)    | C156-C158 | $\pi^*$    | 5.24  | 0.30 | 0.036 |
| O119      | LP(2)    | C112-C117 | $\sigma^*$ | 21.69 | 0.75 | 0.116 |
| O186      | LP(2)    | N184-O185 | $\sigma^*$ | 20.60 | 0.76 | 0.113 |
| S43       | LP(1)    | C45-C109  | $\sigma^*$ | 0.55  | 1.21 | 0.023 |

LP = lone pair, (i) donor; (j) acceptor;  $E(2)$  means energy of hyper conjugative interaction (stabilization energy), Unit in *kcal/mol*;  $E(j) - E(i)$  is the energy difference between donor and acceptor i and j NBO orbitals;  $F(i, j)$  is the Fock matrix element between i and j NBO orbitals

**Table S18:** Natural bond orbitals analysis for **TNPD5** with its representative values

| Donor(i)  | Type     | Acceptor(j) | Type       | $E(2)$<br>[ <i>kcal/mol</i> ] | $E(j)-E(i)$<br>[ <i>a.u.</i> ] | $F(i,j)$<br>[ <i>a.u.</i> ] |
|-----------|----------|-------------|------------|-------------------------------|--------------------------------|-----------------------------|
| C44-C45   | $\pi$    | C109-C110   | $\pi^*$    | 32.04                         | 0.31                           | 0.089                       |
| C109-C110 | $\pi$    | C116-C118   | $\pi^*$    | 27.30                         | 0.29                           | 0.081                       |
| C5-C6     | $\pi$    | C3-C4       | $\pi^*$    | 25.70                         | 0.30                           | 0.079                       |
| C83-C85   | $\pi$    | C82-C84     | $\pi^*$    | 24.71                         | 0.30                           | 0.078                       |
| C150-C152 | $\pi$    | C145-C147   | $\pi^*$    | 23.96                         | 0.30                           | 0.077                       |
| C113-C114 | $\pi$    | C138-C143   | $\pi^*$    | 22.77                         | 0.30                           | 0.075                       |
| C145-C147 | $\pi$    | C146-C148   | $\pi^*$    | 21.98                         | 0.30                           | 0.073                       |
| C170-C172 | $\pi$    | C165-C167   | $\pi^*$    | 20.56                         | 0.29                           | 0.070                       |
| C3-C4     | $\pi$    | C1-C2       | $\pi^*$    | 19.88                         | 0.30                           | 0.070                       |
| C177-C180 | $\pi$    | C176-C181   | $\pi^*$    | 18.75                         | 0.31                           | 0.069                       |
| C156-C158 | $\pi$    | C160-C162   | $\pi^*$    | 17.99                         | 0.32                           | 0.068                       |
| C44-C45   | $\pi$    | C41-C42     | $\pi^*$    | 17.05                         | 0.30                           | 0.065                       |
| C29-C31   | $\pi$    | C26-C27     | $\pi^*$    | 16.97                         | 0.31                           | 0.067                       |
| C41-C42   | $\pi$    | C29-C31     | $\pi^*$    | 15.34                         | 0.30                           | 0.061                       |
| C35-C36   | $\pi$    | C22-C24     | $\pi^*$    | 14.45                         | 0.31                           | 0.062                       |
| C117-O119 | $\pi$    | C112-C115   | $\pi^*$    | 4.84                          | 0.41                           | 0.043                       |
| C117-O119 | $\pi$    | C109-C110   | $\pi^*$    | 3.58                          | 0.43                           | 0.038                       |
| C122-N123 | $\pi$    | C120-N121   | $\pi^*$    | 0.63                          | 0.47                           | 0.015                       |
| C109-H111 | $\sigma$ | S43-C45     | $\sigma^*$ | 10.08                         | 0.73                           | 0.077                       |
| C143-C186 | $\sigma$ | C186-N187   | $\sigma^*$ | 8.96                          | 1.62                           | 0.108                       |
| C118-C122 | $\sigma$ | C122-N123   | $\sigma^*$ | 8.13                          | 1.61                           | 0.103                       |
| C3-C4     | $\sigma$ | C9-S13      | $\sigma^*$ | 7.40                          | 0.91                           | 0.073                       |
| C118-C120 | $\sigma$ | C116-C118   | $\sigma^*$ | 6.21                          | 1.34                           | 0.081                       |
| C19-C20   | $\sigma$ | C14-C19     | $\sigma^*$ | 5.99                          | 1.26                           | 0.078                       |
| C39-C145  | $\sigma$ | C38-C39     | $\sigma^*$ | 4.98                          | 1.30                           | 0.072                       |
| C10-C11   | $\sigma$ | C9-C10      | $\sigma^*$ | 4.89                          | 1.27                           | 0.071                       |
| C180-H182 | $\sigma$ | C159-C177   | $\sigma^*$ | 4.64                          | 1.08                           | 0.063                       |
| C15-C55   | $\sigma$ | C14-S18     | $\sigma^*$ | 3.99                          | 0.85                           | 0.052                       |
| C143-C144 | $\sigma$ | C184-N185   | $\sigma^*$ | 3.76                          | 1.60                           | 0.070                       |
| C165-C166 | $\sigma$ | N155-C156   | $\sigma^*$ | 3.16                          | 1.12                           | 0.053                       |
| C180-C181 | $\sigma$ | C177-H179   | $\sigma^*$ | 2.88                          | 1.11                           | 0.051                       |
| C82-C84   | $\sigma$ | C83-H86     | $\sigma^*$ | 2.64                          | 1.13                           | 0.049                       |

|           |          |           |            |       |      |       |
|-----------|----------|-----------|------------|-------|------|-------|
| C166-C168 | $\sigma$ | C172-H175 | $\sigma^*$ | 2.40  | 1.14 | 0.047 |
| C2-C3     | $\sigma$ | C4-C34    | $\sigma^*$ | 2.37  | 1.11 | 0.046 |
| C78-O127  | $\sigma$ | C78-C80   | $\sigma^*$ | 1.21  | 1.51 | 0.038 |
| C120-N121 | $\sigma$ | C116-C118 | $\sigma^*$ | 0.50  | 1.64 | 0.026 |
| O127      | LP(2)    | C78-C80   | $\pi^*$    | 33.18 | 0.36 | 0.104 |
| S142      | LP(2)    | C112-C115 | $\pi^*$    | 26.91 | 0.28 | 0.078 |
| N155      | LP(1)    | C156-C158 | $\pi^*$    | 5.38  | 0.30 | 0.036 |
| O119      | LP(2)    | C112-C117 | $\sigma^*$ | 21.74 | 0.75 | 0.116 |
| O119      | LP(2)    | C112-C117 | $\sigma^*$ | 21.85 | 0.75 | 0.116 |
| N121      | LP(1)    | C118-C120 | $\sigma^*$ | 12.64 | 1.04 | 0.103 |
| S43       | LP(1)    | C45-C109  | $\sigma^*$ | 0.55  | 1.21 | 0.023 |

LP = lone pair, (i) donor; (j) acceptor;  $E(2)$  means energy of hyper conjugative interaction (stabilization energy), Unit in *kcal/mol*;  $E(j) - E(i)$  is the energy difference between donor and acceptor i and j NBO orbitals;  $F(i, j)$  is the Fock matrix element between i and j NBO orbitals

**Table S19:** Natural bond orbitals analysis for **TNPD6** with its representative values

| Donor(i)  | Type     | Acceptor(j) | Type       | $E(2)$<br>[ <i>kcal/mol</i> ] | $E(j)-E(i)$<br>[ <i>a.u</i> ] | $F(i,j)$<br>[ <i>a.u</i> ] |
|-----------|----------|-------------|------------|-------------------------------|-------------------------------|----------------------------|
| C44-C45   | $\pi$    | C109-C110   | $\pi^*$    | 29.78                         | 0.31                          | 0.087                      |
| C5-C6     | $\pi$    | C3-C4       | $\pi^*$    | 25.53                         | 0.30                          | 0.078                      |
| C83-C85   | $\pi$    | C82-C84     | $\pi^*$    | 24.59                         | 0.30                          | 0.078                      |
| C66-C70   | $\pi$    | C65-C68     | $\pi^*$    | 23.99                         | 0.30                          | 0.077                      |
| C160-C162 | $\pi$    | C159-C161   | $\pi^*$    | 22.92                         | 0.29                          | 0.075                      |
| C140-C142 | $\pi$    | C144-C146   | $\pi^*$    | 21.98                         | 0.30                          | 0.074                      |
| C5-C6     | $\pi$    | C1-C2       | $\pi^*$    | 20.81                         | 0.30                          | 0.072                      |
| C112-C115 | $\pi$    | C117-O119   | $\pi^*$    | 19.88                         | 0.32                          | 0.073                      |
| C171-C174 | $\pi$    | C170-C 75   | $\pi^*$    | 18.75                         | 0.31                          | 0.069                      |
| C150-C152 | $\pi$    | C154-C156   | $\pi^*$    | 17.96                         | 0.32                          | 0.068                      |
| C29-C31   | $\pi$    | C26-C27     | $\pi^*$    | 16.96                         | 0.31                          | 0.067                      |
| C35-C36   | $\pi$    | C38-C39     | $\pi^*$    | 15.68                         | 0.31                          | 0.065                      |
| C5-C6     | $\pi$    | C16-C17     | $\pi^*$    | 14.55                         | 0.30                          | 0.059                      |
| C117-O119 | $\pi$    | C112-C115   | $\pi^*$    | 4.65                          | 0.42                          | 0.044                      |
| C1-C2     | $\pi$    | C73-C75     | $\pi^*$    | 1.06                          | 0.31                          | 0.016                      |
| C122-N123 | $\pi$    | C120-N121   | $\pi^*$    | 0.62                          | 0.47                          | 0.015                      |
| C109-H111 | $\sigma$ | S43-C45     | $\sigma^*$ | 9.94                          | 0.73                          | 0.076                      |
| C118-C120 | $\sigma$ | C120-N      | $\sigma^*$ | 8.33                          | 1.62                          | 0.104                      |
| C3-C4     | $\sigma$ | C9-S13      | $\sigma^*$ | 7.4                           | 0.90                          | 0.073                      |
| C24-C35   | $\sigma$ | C35-C36     | $\sigma^*$ | 6.87                          | 1.32                          | 0.085                      |
| C19-C20   | $\sigma$ | C14-C9      | $\sigma^*$ | 5.97                          | 1.26                          | 0.077                      |
| C44-H46   | $\sigma$ | S43-C45     | $\sigma^*$ | 5.23                          | 0.74                          | 0.056                      |
| C39-C139  | $\sigma$ | C38-C39     | $\sigma^*$ | 4.99                          | 1.30                          | 0.072                      |
| C166-H169 | $\sigma$ | C161-C164   | $\sigma^*$ | 3.99                          | 1.11                          | 0.060                      |
| C44-H46   | $\sigma$ | C41-C42     | $\sigma^*$ | 3.33                          | 1.11                          | 0.054                      |
| C35-C36   | $\sigma$ | C38-H40     | $\sigma^*$ | 2.99                          | 1.14                          | 0.052                      |
| C1-C33    | $\sigma$ | C16-C33     | $\sigma^*$ | 1.99                          | 1.03                          | 0.040                      |



|           |          |            |            |       |      |       |
|-----------|----------|------------|------------|-------|------|-------|
| C146-N149 | $\sigma$ | C159-C161  | $\sigma^*$ | 1.90  | 1.37 | 0.046 |
| C36-C38   | $\sigma$ | C47-H49    | $\sigma^*$ | 0.61  | 1.07 | 0.023 |
| C120-N121 | $\sigma$ | C116-C118  | $\sigma^*$ | 0.50  | 1.64 | 0.026 |
| O127      | LP(2)    | C78-C80    | $\pi^*$    | 33.19 | 0.36 | 0.104 |
| S138      | LP(2)    | C112-C115  | $\pi^*$    | 27.31 | 0.28 | 0.078 |
| N149      | LP(1)    | C159-C161  | $\pi^*$    | 25.84 | 0.30 | 0.081 |
| N149      | LP(1)    | C 150-C152 | $\pi^*$    | 5.07  | 0.30 | 0.035 |
| O119      | LP(2)    | C112-C117  | $\sigma^*$ | 21.56 | 0.76 | 0.116 |
| N123      | LP(1)    | C118-C122  | $\sigma^*$ | 12.59 | 1.04 | 0.102 |
| S43       | LP(1)    | C45-C109   | $\sigma^*$ | 0.55  | 1.21 | 0.023 |

LP = lone pair, (i) donor; (j) acceptor;  $E(2)$  means energy of hyper conjugative interaction (stabilization energy), Unit in *kcal/mol*;  $E(j) - E(i)$  is the energy difference between donor and acceptor i and j NBO orbitals;  $F(i, j)$  is the Fock matrix element between i and j NBO orbitals

**Table S20:** Calculated energies ( $E$ ) and energy gap ( $\Delta E$ ) of HOMO-1, LUMO+1, HOMO-2 and LUMO+2 for TNPR, TNPD1-TNPD6.

| Compounds | $E_{\text{HOMO-1}}$ | $E_{\text{LUMO+1}}$ | $\Delta E$ | $E_{\text{HOMO-2}}$ | $E_{\text{LUMO+2}}$ | $\Delta E$ |
|-----------|---------------------|---------------------|------------|---------------------|---------------------|------------|
| TNPR      | -5.988              | -3.26               | 2.728      | -6.483              | -2.611              | 3.872      |
| TNPD1     | -5.621              | -2.815              | 2.806      | -6.004              | -2.047              | 3.957      |
| TNPD2     | -5.621              | -2.787              | 2.834      | -6.003              | -2.043              | 3.96       |
| TNPD3     | -5.634              | -3.501              | 2.133      | -6.02               | -2.05               | 3.97       |
| TNPD4     | -5.627              | -2.870              | 2.757      | -6.004              | -2.591              | 3.413      |
| TNPD5     | -5.639              | -2.92               | 2.719      | -6.03               | -2.273              | 3.757      |
| TNPD6     | -5.616              | -2.645              | 2.971      | -5.997              | -2.016              | 3.981      |

**Table S21:** Wavelength, excitation energy and oscillator strength of TNPR in gas phase

| NO | $\lambda_{\text{DFT}}$ | $E$ (eV) | $f_{\text{os}}$ | MO contributions                                            |
|----|------------------------|----------|-----------------|-------------------------------------------------------------|
| 1  | 671.128                | 1.847    | 2.637           | H→L (86%), H-1→L+1 (5%), H→L+1 (5%)                         |
| 2  | 621.693                | 1.994    | 0.029           | H→L+1 (91%), H-1→L (2%), H→L (5%)                           |
| 3  | 518.090                | 2.393    | 0.217           | H-1→L (89%), H→L (3%)                                       |
| 4  | 507.466                | 2.443    | 0.949           | H-1→L+1 (73%), H→L (5%), H→L+1 (2%), H→L+2 (6%), H→L+4 (4%) |
| 5  | 485.831                | 2.552    | 0.077           | H-1→L+1 (10%), H→L+2 (70%), H-1→L+3 (8%), H→L+3 (5%)        |
| 6  | 478.205                | 2.593    | 0.002           | H-1→L+2 (10%), H→L+3 (79%), H→L+2 (6%)                      |

MO=molecular orbital, H=HOMO, L=LUMO,  $f_{\text{os}}$ = oscillator strength, wavelength=  $\lambda$  (nm)

**Table S22:** Wavelength, excitation energy and oscillator strength of investigated compound (TNPD1) in gas phase

| NO | DFT $\lambda$ (nm) | $E$ (eV) | $f_{\text{os}}$ | MO contributions                         |
|----|--------------------|----------|-----------------|------------------------------------------|
| 1  | 807.241            | 1.536    | 0.387           | H→L (93%), H-1→L (5%)                    |
| 2  | 666.045            | 1.862    | 0.430           | H-1→L (82%), H-2→L (9%), H→L (7%)        |
| 3  | 601.165            | 2.062    | 0.658           | H-1→L+1 (11%), H→L+1 (83%), H-2→L+1 (2%) |

|   |         |       |       |                                                                |
|---|---------|-------|-------|----------------------------------------------------------------|
| 4 | 561.243 | 2.209 | 0.239 | H-2→L (74%), H-1→L (12%), H-4→L (7%)                           |
| 5 | 518.459 | 2.391 | 0.560 | H-2→L+1 (12%), H-1→L+1 (66%), H→L+1 (16%), H→L+2 (2%)          |
| 6 | 479.537 | 2.586 | 0.446 | H-4→L (27%), H-3→L (36%), H-2→L (13%), H→L+2 (13%), H-9→L (5%) |

MO=molecular orbital, H=HOMO, L=LUMO,  $f_{os}$  = oscillator strength, wavelength=  $\lambda$  (nm)

**Table S23:** Wavelength, excitation energy and oscillator strength of investigated compound (TNPD2) in gas phase

| NO | DFT $\lambda$<br>(nm) | $E$ (eV) | $f_{os}$ | MO contributions                                                           |
|----|-----------------------|----------|----------|----------------------------------------------------------------------------|
| 1  | 783.668               | 1.582    | 0.407    | H→L (92%), H-1→L (6%)                                                      |
| 2  | 652.034               | 1.902    | 0.464    | H-1→L (80%), H-2→L (9%), H→L (8%)                                          |
| 3  | 587.854               | 2.109    | 0.699    | H-1→L+1 (12%), H→L+1 (82%), H-2→L+1 (2%)                                   |
| 4  | 550.527               | 2.252    | 0.235    | H-2→L (71%), H-1→L (13%), H-4→L (7%), H-3→L (4%)                           |
| 5  | 509.468               | 2.434    | 0.596    | H-2→L+1 (12%), H-1→L+1 (63%), H→L+1 (17%), H→L+2 (3%)                      |
| 6  | 474.908               | 2.611    | 0.842    | H-4→L (17%), H-3→L (22%), H-2→L (14%), H→L+2 (33%), H-9→L (4%), H→L+3 (2%) |

MO=molecular orbital, H=HOMO, L=LUMO,  $f_{os}$  = oscillator strength, wavelength=  $\lambda$  (nm)

**Table S24:** Wavelength, excitation energy and oscillator strength of investigated compound (TNPD3) in gas phase

| NO | DFT $\lambda$<br>(nm) | $E$ (eV) | $f_{os}$ | MO contributions                                              |
|----|-----------------------|----------|----------|---------------------------------------------------------------|
| 1  | 843.602               | 1.470    | 0.339    | H→L (94%), H-1→L (5%)                                         |
| 2  | 687.693               | 1.803    | 0.384    | H-1→L (84%), H-2→L (8%), H→L (6%)                             |
| 3  | 608.900               | 2.036    | 0.626    | H-1→L+1 (10%), H→L+1 (85%), H-2→L+1 (2%)                      |
| 4  | 577.772               | 2.146    | 0.266    | H-2→L (77%), H-1→L (10%), H-4→L (7%)                          |
| 5  | 522.831               | 2.371    | 0.514    | H-2→L+1 (12%), H-1→L+1 (68%), H→L+1 (14%),                    |
| 6  | 488.974               | 2.536    | 0.281    | H-4→L (43%), H-3→L (28%), H-2→L (12%), H-9→L (6%), H→L+2 (4%) |

MO=molecular orbital, H=HOMO, L=LUMO,  $f_{os}$  = oscillator strength, wavelength=  $\lambda$  (nm)

**Table S25:** Wavelength, excitation energy and oscillator strength of investigated compound (TNPD4) in gas phase

| NO | $\lambda_{DFT}$ | $E$ (eV) | $f_{os}$ | MO contributions                                                  |
|----|-----------------|----------|----------|-------------------------------------------------------------------|
| 1  | 816.814         | 1.518    | 0.369    | H→L (94%), H-1→L (5%)                                             |
| 2  | 668.523         | 1.855    | 0.407    | H-1→L (82%), H-2→L (9%), H→L (6%)                                 |
| 3  | 610.309         | 2.032    | 0.594    | H→L+1 (85%), H-2→L+1 (2%), H-1→L+1 (9%)                           |
| 4  | 566.837         | 2.187    | 0.247    | H-2→L (74%), H-1→L (13%), H-4→L (7%)                              |
| 5  | 523.914         | 2.367    | 0.608    | H-2→L+1 (12%), H-1→L+1 (63%), H→L+1 (14%), H→L+2 (4%), H→L+3 (3%) |
| 6  | 501.981         | 2.470    | 0.041    | H→L+2 (89%), H-1→L+1 (6%), H-1→L+2 (3%)                           |

MO=molecular orbital, H=HOMO, L=LUMO,  $f_{os}$  = oscillator strength, wavelength=  $\lambda$  (nm)

**Table S26:** Wavelength, excitation energy and oscillator strength of investigated compound (TNPD5) in gas phase

| NO | DFT<br>$\lambda$ (nm) | $E$ (eV) | $f_{os}$ | MO contributions                                 |
|----|-----------------------|----------|----------|--------------------------------------------------|
| 1  | 931.302               | 1.331    | 0.264    | H→L (96%), H-1→L (3%)                            |
| 2  | 742.376               | 1.670    | 0.377    | H-1→L (88%), H-2→L (6%), H→L (4%)                |
| 3  | 642.372               | 1.930    | 0.563    | H→L+1 (88%), H-1→L+1 (8%)                        |
| 4  | 610.459               | 2.031    | 0.246    | H-2→L (80%), H-4→L (7%), H-1→L (8%)              |
| 5  | 548.821               | 2.259    | 0.564    | H-2→L+1 (10%), H-1→L+1 (73%), H→L+1 (11%),       |
| 6  | 517.982               | 2.394    | 0.120    | H-4→L (18%), H-3→L (67%), H-9→L (2%), H-2→L (8%) |

MO=molecular orbital, H=HOMO, L=LUMO,  $f_{os}$ = oscillator strength, wavelength=  $\lambda$  (nm)

**Table S27:** Wavelength, excitation energy and oscillator strength of investigated compound (TNPD6) in gas phase

| NO | DFT<br>$\lambda$ (nm) | $E$ (eV) | $f_{os}$ | MO contributions                                                               |
|----|-----------------------|----------|----------|--------------------------------------------------------------------------------|
| 1  | 697.442               | 1.778    | 0.653    | H→L (90%), H-1→L (7%)                                                          |
| 2  | 588.272               | 2.108    | 0.600    | H-1→L (77%), H→L (10%), H-2→L (9%)                                             |
| 3  | 542.316               | 2.286    | 0.607    | H-1→L+1 (12%), H→L+1 (78%), H-2→L+1 (3%), H→L+2 (3%)                           |
| 4  | 506.017               | 2.450    | 0.410    | H-2→L (72%), H-1→L (13%), H-4→L (4%), H-3→L (5%), H→L+2 (2%)                   |
| 5  | 474.199               | 2.615    | 0.618    | H-2→L+1 (11%), H-1→L+1 (51%), H→L+1 (21%), H→L+2 (11%),                        |
| 6  | 463.111               | 2.677    | 0.910    | H-1→L+1 (13%), H→L+2 (67%), H-2→L (6%), H-2→L+1 (2%), H-1→L+3 (3%), H→L+3 (5%) |

MO=molecular orbital, H=HOMO, L=LUMO,  $f_{os}$ = oscillator strength, wavelength=  $\lambda$  (nm)

**Table S28:** Wavelength, excitation energy and oscillator strength of reference compound (TNPR) in chloroform

| NO | DFT<br>$\lambda$ (nm) | $E$ (eV) | $f_{os}$ | MO contributions                                             |
|----|-----------------------|----------|----------|--------------------------------------------------------------|
| 1  | 706.785               | 1.754    | 2.960    | H→L (86%), H-1→L+1 (8%)                                      |
| 2  | 658.895               | 1.882    | 0.016    | H→L+1 (89%), H-1→L (7%)                                      |
| 3  | 538.757               | 2.301    | 0.064    | H-1→L (83%), H-2→L+1 (5%), H→L+1 (7%)                        |
| 4  | 525.513               | 2.359    | 0.921    | H-1→L+1 (75%), H→L (10%), H-2→L (5%), H→L+2 (3%), H→L+4 (2%) |
| 5  | 502.530               | 2.467    | 0.166    | H-1→L+3 (10%), H→L+2 (77%), H-1→L+1 (6%)                     |
| 6  | 493.214               | 2.514    | 0.002    | H-1→L+2 (12%), H→L+3 (82%),                                  |

MO=molecular orbital, H=HOMO, L=LUMO,  $f_{os}$ = oscillator strength, wavelength=  $\lambda$  (nm)

**Table S29:** Wavelength, excitation energy and oscillator strength of investigated compound (TNPD1) in chloroform

| NO | DFT<br>$\lambda$ (nm) | $E$ (eV) | $f_{os}$ | MO contributions                     |
|----|-----------------------|----------|----------|--------------------------------------|
| 1  | 774.127               | 1.602    | 0.704    | H-1→L (13%), H→L (83%), H-2→L (3%)   |
| 2  | 652.720               | 1.900    | 0.382    | H-2→L (11%), H-1→L (68%), H→L (17%), |

|   |         |       |       |                                                      |
|---|---------|-------|-------|------------------------------------------------------|
| 3 | 583.537 | 2.125 | 0.969 | H-1→L+1 (19%), H→L+1 (70%), H-2→L+1 (5%), H→L+2 (3%) |
| 4 | 550.112 | 2.254 | 0.165 | H-2→L (68%), H-1→L (18%), H-3→L (9%)                 |
| 5 | 503.285 | 2.464 | 0.242 | H-2→L+1 (12%), H-1→L+1 (55%), H→L+1 (27%),           |
| 6 | 478.168 | 2.593 | 1.561 | H→L+2 (79%), H-1→L+4 (2%), H→L+3 (4%), H→L+4 (2%)    |

MO=molecular orbital, H=HOMO, L=LUMO,  $f_{os}$  = oscillator strength, wavelength=  $\lambda$  (nm)

**Table S30:** Wavelength, excitation energy and oscillator strength of investigated compound (TNPD2) in chloroform

| NO | DFT<br>$\lambda$ (nm) | $E$ (eV) | $f_{os}$ | MO contributions                                     |
|----|-----------------------|----------|----------|------------------------------------------------------|
| 1  | 766.754               | 1.617    | 0.690    | H-1→L (13%), H→L (82%), H-2→L (3%)                   |
| 2  | 649.574               | 1.909    | 0.395    | H-2→L (11%), H-1→L (67%), H→L (18%),                 |
| 3  | 576.939               | 2.149    | 1.007    | H-1→L+1 (20%), H→L+1 (68%), H-2→L+1 (4%), H→L+2 (3%) |
| 4  | 546.836               | 2.267    | 0.170    | H-3→L (11%), H-2→L (66%), H-1→L (18%),               |
| 5  | 499.332               | 2.483    | 0.243    | H-2→L+1 (12%), H-1→L+1 (54%), H→L+1 (28%),           |
| 6  | 479.018               | 2.588    | 1.572    | H→L+2 (80%), H-1→L+3 (3%), H→L+3 (6%)                |

MO=molecular orbital, H=HOMO, L=LUMO,  $f_{os}$  = oscillator strength, wavelength=  $\lambda$  (nm)

**Table S31:** Wavelength, excitation energy and oscillator strength of investigated compound (TNPD3) in chloroform

| NO | DFT<br>$\lambda$ (nm) | $E$ (eV) | $f_{os}$ | MO contributions                                                          |
|----|-----------------------|----------|----------|---------------------------------------------------------------------------|
| 1  | 799.279               | 1.551    | 0.627    | H-1→L (11%), H→L (85%), H-2→L (2%)                                        |
| 2  | 667.910               | 1.856    | 0.386    | H-2→L (11%), H-1→L (71%), H→L (14%),                                      |
| 3  | 585.632               | 2.117    | 0.953    | H-1→L+1 (17%), H→L+1 (72%), H-2→L+1 (5%), H→L+2 (2%)                      |
| 4  | 564.463               | 2.197    | 0.172    | H-2→L (70%), H-1→L (17%), H-3→L (9%)                                      |
| 5  | 503.755               | 2.461    | 0.263    | H-2→L+1 (13%), H-1→L+1 (56%), H→L+1 (26%),                                |
| 6  | 478.039               | 2.594    | 1.035    | H-3→L (33%), H-2→L (11%), H→L+2 (39%), H-9→L (4%), H-4→L (3%), H→L+3 (2%) |

MO=molecular orbital, H=HOMO, L=LUMO,  $f_{os}$  = oscillator strength, wavelength=  $\lambda$  (nm)

**Table S32:** Wavelength, excitation energy and oscillator strength of investigated compound (TNPD4) in chloroform

| NO | DFT<br>$\lambda$ (nm) | $E$ (eV) | $f_{os}$ | MO contributions                                                        |
|----|-----------------------|----------|----------|-------------------------------------------------------------------------|
| 1  | 780.315               | 1.589    | 0.665    | H-1→L (11%), H→L (84%), H-2→L (3%)                                      |
| 2  | 654.236               | 1.895    | 0.384    | H-2→L (12%), H-1→L (68%), H→L (16%),                                    |
| 3  | 592.121               | 2.094    | 0.868    | H-1→L+1 (16%), H→L+1 (72%), H-2→L+1 (4%),<br>H→L+3 (2%)                 |
| 4  | 555.186               | 2.233    | 0.161    | H-2→L (68%), H-1→L (19%), H-3→L (8%)                                    |
| 5  | 512.925               | 2.417    | 0.430    | H-2→L+1 (10%), H-1→L+1 (39%), H→L+1 (26%),<br>H→L+2 (15%), H-1→L+2 (4%) |
| 6  | 498.008               | 2.490    | 0.077    | H-1→L+1 (20%), H→L+2 (67%), H-2→L+1 (3%), H-1→L+2 (2%), H→L+3 (5%)      |

**Table S33:** Wavelength, excitation energy and oscillator strength of investigated compound (TNPd5) in chloroform

| NO | DFT<br>$\lambda$ (nm) | $E$ (eV) | $f_{os}$ | MO contributions                                 |
|----|-----------------------|----------|----------|--------------------------------------------------|
| 1  | 852.242               | 1.455    | 0.553    | H-1→L (10%), H→L (87%),                          |
| 2  | 709.413               | 1.748    | 0.408    | H-1→L (75%), H→L (13%), H-2→L (9%)               |
| 3  | 604.241               | 2.052    | 0.966    | H-1→L+1 (18%), H→L+1 (73%), H-2→L+1 (4%)         |
| 4  | 586.796               | 2.113    | 0.144    | H-2→L (73%), H-1→L (14%), H-4→L (2%), H-3→L (8%) |
| 5  | 521.402               | 2.378    | 0.298    | H-2→L+1 (11%), H-1→L+1 (58%), H→L+1 (25%),       |
| 6  | 495.145               | 2.504    | 0.178    | H-3→L (61%), H-2→L (15%), H-9→L (6%), H-4→L (9%) |

MO=molecular orbital, H=HOMO, L=LUMO,  $f_{os}$ = oscillator strength, wavelength=  $\lambda$  (nm)

**Table S34:** Wavelength, excitation energy and oscillator strength of investigated compound (TNPd6) in chloroform

| NO | DFT<br>$\lambda$ (nm) | $E$ (eV) | $f_{os}$ | MO contributions                                                  |
|----|-----------------------|----------|----------|-------------------------------------------------------------------|
| 1  | 694.745               | 1.785    | 0.997    | H-1→L (14%), H→L (79%), H-2→L (3%)                                |
| 2  | 590.204               | 2.101    | 0.482    | H-2→L (11%), H-1→L (64%), H→L (20%),                              |
| 3  | 540.802               | 2.293    | 0.786    | H-1→L+1 (18%), H→L+1 (67%), H-2→L+1 (5%), H→L+2 (4%)              |
| 4  | 506.948               | 2.446    | 0.260    | H-3→L (10%), H-2→L (67%), H-1→L (19%),                            |
| 5  | 472.645               | 2.623    | 1.075    | H→L+2 (73%), H-2→L+1 (3%), H-1→L+1 (9%), H-1→L+3 (3%), H→L+3 (5%) |
| 6  | 470.368               | 2.636    | 0.414    | H-2→L+1 (11%), H-1→L+1 (45%), H→L+1 (31%), H→L+2 (7%)             |

MO=molecular orbital, H=HOMO, L=LUMO,  $f_{os}$ = oscillator strength, wavelength=  $\lambda$  (nm)

**Table S35:** Percentages of donor,  $\pi$ -spacer and acceptor for HOMOs and LUMOs of TNPR and TNPd1-TNPd6

| Compounds | HOMO     |       |               | LUMO     |       |               |
|-----------|----------|-------|---------------|----------|-------|---------------|
|           | Acceptor | Donor | $\pi$ -spacer | Acceptor | Donor | $\pi$ -spacer |
| TNPR      | 7.6      | ----  | 92.4          | 62.6     | ----- | 37.4          |
| TNPd1     | 1.1      | 20.8  | 78.1          | 82.0     | 0.0   | 18.0          |
| TNPd2     | 1.0      | 21.3  | 77.7          | 82.5     | 0.0   | 17.5          |
| TNPd3     | 1.0      | 20.3  | 78.7          | 82.9     | 0.0   | 17.1          |
| TNPd4     | 1.1      | 19.5  | 79.4          | 82.7     | 0.0   | 17.3          |
| TNPd5     | 1.0      | 22.7  | 76.3          | 84.0     | 0.0   | 16.0          |
| TNPd6     | 1.0      | 19.4  | 79.6          | 75.4     | 0.0   | 24.6          |

**Table S36:** Dipole polarizability ( $D$ ) of the studied compounds (TNPR and TNPd1-TNPd6).

| Dipole Moment | TNPR   | TNPd1   | TNPd2   | TNPd3   | TNPd4   | TNPd5    | TNPd6   |
|---------------|--------|---------|---------|---------|---------|----------|---------|
| $\mu_x$       | 0.8570 | -7.9798 | 10.3447 | 11.3761 | -8.2252 | -11.7648 | -9.4745 |
| $\mu_y$       | 2.3446 | 4.0619  | -1.9208 | -4.9929 | 4.0918  | 9.6547   | -0.5668 |

|                       |                         |                         |                         |                         |                         |                         |                         |
|-----------------------|-------------------------|-------------------------|-------------------------|-------------------------|-------------------------|-------------------------|-------------------------|
| $\mu_z$               | 0.6720                  | 1.2212                  | 0.7554                  | 0.4143                  | 1.0095                  | 1.5017                  | -0.4329                 |
| $\mu_{total}$         | 2.5852                  | 9.0370                  | 10.5486                 | 12.4305                 | 9.2421                  | 15.2931                 | 9.5013                  |
| Polarizabilit         |                         |                         |                         |                         |                         |                         |                         |
| y                     |                         |                         |                         |                         |                         |                         |                         |
| $\alpha_{xx}$         | $6.525 \times 10^{-22}$ | $5.628 \times 10^{-22}$ | $5.638 \times 10^{-22}$ | $5.672 \times 10^{-22}$ | $5.653 \times 10^{-22}$ | $5.898 \times 10^{-22}$ | $5.281 \times 10^{-22}$ |
| $\alpha_{yy}$         | $2.464 \times 10^{-22}$ | $2.897 \times 10^{-22}$ | $2.967 \times 10^{-22}$ | $2.811 \times 10^{-22}$ | $2.873 \times 10^{-22}$ | $2.998 \times 10^{-22}$ | $2.294 \times 10^{-22}$ |
| $\alpha_{zz}$         | $1.605 \times 10^{-22}$ | $1.948 \times 10^{-22}$ | $5.859 \times 10^{-22}$ | $1.998 \times 10^{-22}$ | $1.930 \times 10^{-22}$ | $1.942 \times 10^{-22}$ | $2.179 \times 10^{-22}$ |
| $\alpha_{total}$      | $3.532 \times 10^{-22}$ | $3.491 \times 10^{-22}$ | $3.510 \times 10^{-22}$ | $3.494 \times 10^{-22}$ | $3.485 \times 10^{-22}$ | $3.613 \times 10^{-22}$ | $3.251 \times 10^{-22}$ |
| 2 <sup>nd</sup> Hyper |                         |                         |                         |                         |                         |                         |                         |
| pol.                  |                         |                         |                         |                         |                         |                         |                         |
| $\gamma_X$            | $7.977 \times 10^{-32}$ | $6.057 \times 10^{-32}$ | $5.725 \times 10^{-32}$ | $6.831 \times 10^{-32}$ | $6.216 \times 10^{-32}$ | $9.307 \times 10^{-32}$ | $4.099 \times 10^{-32}$ |
| $\gamma_Y$            | $1.620 \times 10^{-34}$ | $4.220 \times 10^{-34}$ | $6.275 \times 10^{-34}$ | $6.512 \times 10^{-34}$ | $4.562 \times 10^{-34}$ | $8.709 \times 10^{-34}$ | $2.990 \times 10^{-34}$ |
| $\gamma_Z$            | $2.055 \times 10^{-34}$ | $6.896 \times 10^{-34}$ | $4.780 \times 10^{-34}$ | $4.799 \times 10^{-34}$ | $5.030 \times 10^{-34}$ | $7.766 \times 10^{-34}$ | $2.675 \times 10^{-34}$ |
| Average< $\gamma$ >   | $8.014 \times 10^{-32}$ | $6.168 \times 10^{-32}$ | $5.835 \times 10^{-32}$ | $6.944 \times 10^{-32}$ | $6.312 \times 10^{-32}$ | $9.472 \times 10^{-32}$ | $4.157 \times 10^{-32}$ |
| Magnitude of $\gamma$ | $7.977 \times 10^{-32}$ | $6.058 \times 10^{-32}$ | $5.725 \times 10^{-32}$ | $6.831 \times 10^{-32}$ | $6.216 \times 10^{-32}$ | $9.308 \times 10^{-32}$ | $4.100 \times 10^{-32}$ |

**Table S37:** Frequency dependent second hyperpolarizability (*esu*) of studied compounds (TNPR and TNPD1-TNPD6).

| Parameters                            | Frequency $\omega$ | TNPR                    | TNPD1                    | TNPD2                   | TNPD3                    |
|---------------------------------------|--------------------|-------------------------|--------------------------|-------------------------|--------------------------|
| $\gamma(-\omega, \omega, 0, 0)$       | 0.000              | $8.014 \times 10^{-32}$ | $6.168 \times 10^{-32}$  | $5.835 \times 10^{-32}$ | $6.944 \times 10^{-32}$  |
|                                       | 1907.21nm          | $1.084 \times 10^{-31}$ | $9.584 \times 10^{-32}$  | $8.970 \times 10^{-32}$ | $1.148 \times 10^{-31}$  |
| $\gamma(-2\omega, \omega, \omega, 0)$ | 0.000              | $8.014 \times 10^{-32}$ | $6.168 \times 10^{-32}$  | $5.835 \times 10^{-32}$ | $6.944 \times 10^{-32}$  |
|                                       | 1907.21nm          | $3.716 \times 10^{-31}$ | $-1.689 \times 10^{-28}$ | $5.788 \times 10^{-30}$ | $-1.112 \times 10^{-30}$ |

Continued...

| TNPD4                    | TNPD5                    | TNPD6                   |
|--------------------------|--------------------------|-------------------------|
| $6.312 \times 10^{-32}$  | $9.471 \times 10^{-32}$  | $4.156 \times 10^{-32}$ |
| $9.937 \times 10^{-32}$  | $1.804 \times 10^{-31}$  | $5.673 \times 10^{-32}$ |
| $6.312 \times 10^{-32}$  | $9.472 \times 10^{-32}$  | $4.156 \times 10^{-32}$ |
| $-4.438 \times 10^{-30}$ | $-4.235 \times 10^{-31}$ | $2.270 \times 10^{-31}$ |

**Table S38:** The computed first hyperpolarizability ( $\beta_{tot}$ ) and major contributing tensors (*esu*) of TNPR and TNPD1-TNPD6.

| Polarizability | TNPR                     | TNPD1                    | TNPD2                    | TNPD3                    |
|----------------|--------------------------|--------------------------|--------------------------|--------------------------|
| $\beta_{xxx}$  | $-2.968 \times 10^{-30}$ | $-3.421 \times 10^{-27}$ | $3.243 \times 10^{-27}$  | $3.719 \times 10^{-27}$  |
| $\beta_{xxy}$  | $-8.803 \times 10^{-29}$ | $-5.478 \times 10^{-30}$ | $4.765 \times 10^{-29}$  | $1.963 \times 10^{-28}$  |
| $\beta_{xyy}$  | $4.350 \times 10^{-30}$  | $5.916 \times 10^{-29}$  | $-7.975 \times 10^{-29}$ | $-3.971 \times 10^{-29}$ |
| $\beta_{yyy}$  | $3.627 \times 10^{-30}$  | $-5.220 \times 10^{-29}$ | $1.025 \times 10^{-28}$  | $2.843 \times 10^{-29}$  |

|                 |                          |                          |                          |                          |
|-----------------|--------------------------|--------------------------|--------------------------|--------------------------|
| $\beta_{xxz}$   | $2.756 \times 10^{-28}$  | $3.248 \times 10^{-28}$  | $2.434 \times 10^{-28}$  | $2.405 \times 10^{-28}$  |
| $\beta_{yyz}$   | $-6.078 \times 10^{-30}$ | $-1.173 \times 10^{-29}$ | $-9.759 \times 10^{-30}$ | $-6.791 \times 10^{-31}$ |
| $\beta_{xzz}$   | $2.119 \times 10^{-29}$  | $-4.306 \times 10^{-29}$ | $2.700 \times 10^{-29}$  | $2.275 \times 10^{-29}$  |
| $\beta_{yzz}$   | $-3.105 \times 10^{-30}$ | $1.686 \times 10^{-30}$  | $-2.885 \times 10^{-30}$ | $2.436 \times 10^{-30}$  |
| $\beta_{zzz}$   | $1.552 \times 10^{-30}$  | $3.578 \times 10^{-30}$  | $4.897 \times 10^{-31}$  | $-5.767 \times 10^{-32}$ |
| $\beta_{total}$ | $2.858 \times 10^{-28}$  | $3.420 \times 10^{-27}$  | $3.202 \times 10^{-27}$  | $3.717 \times 10^{-27}$  |

**Continued...**

| <b>TNPD4</b>             | <b>TNPD5</b>             | <b>TNPD6</b>             |
|--------------------------|--------------------------|--------------------------|
| $-3.478 \times 10^{-27}$ | $-4.620 \times 10^{-27}$ | $-2.526 \times 10^{-27}$ |
| $-5.501 \times 10^{-29}$ | $1.363 \times 10^{-29}$  | $-9.989 \times 10^{-29}$ |
| $5.923 \times 10^{-29}$  | $2.945 \times 10^{-29}$  | $1.188 \times 10^{-29}$  |
| $-3.211 \times 10^{-29}$ | $-2.362 \times 10^{-29}$ | $-9.186 \times 10^{-30}$ |
| $2.544 \times 10^{-28}$  | $3.968 \times 10^{-28}$  | $1.864 \times 10^{-28}$  |
| $-7.260 \times 10^{-30}$ | $-2.302 \times 10^{-30}$ | $-9.600 \times 10^{-30}$ |
| $-2.575 \times 10^{-29}$ | $-4.512 \times 10^{-29}$ | $1.134 \times 10^{-30}$  |
| $5.744 \times 10^{-32}$  | $4.233 \times 10^{-30}$  | $-1.066 \times 10^{-29}$ |
| $1.650 \times 10^{-30}$  | $2.695 \times 10^{-30}$  | $-1.104 \times 10^{-29}$ |
| $3.455 \times 10^{-27}$  | $4.653 \times 10^{-27}$  | $2.522 \times 10^{-27}$  |

**Table S39:** Frequency dependent first hyperpolarizability (*esu*) of studied compounds (TNPR and TNPD1-TNPD6).

|          | <b>Parameters</b>                   | <b>Frequency <math>\omega</math></b> | <b>TNPR</b>             | <b>TNPD1</b>            | <b>TNPD2</b>            | <b>TNPD3</b>            |
|----------|-------------------------------------|--------------------------------------|-------------------------|-------------------------|-------------------------|-------------------------|
| Static   | $\beta(-\omega; \omega, 0)$         | 0.000                                | $2.858 \times 10^{-28}$ | $3.420 \times 10^{-27}$ | $3.202 \times 10^{-27}$ | $3.717 \times 10^{-27}$ |
|          | $\beta(-2, \omega; \omega, \omega)$ | 0.000                                | $2.858 \times 10^{-28}$ | $3.420 \times 10^{-27}$ | $3.202 \times 10^{-27}$ | $3.717 \times 10^{-27}$ |
| Specific | $\beta(-\omega; \omega, 0)$         | 1907.21nm                            | $3.248 \times 10^{-28}$ | $4.315 \times 10^{-27}$ | $4.039 \times 10^{-27}$ | $4.786 \times 10^{-27}$ |
|          | $\beta(-2\omega; \omega, \omega)$   | 1907.21nm                            | $6.696 \times 10^{-28}$ | $1.189 \times 10^{-26}$ | $1.079 \times 10^{-26}$ | $1.492 \times 10^{-26}$ |

**Continued...**

| <b>TNPD4</b>            | <b>TNPD5</b>            | <b>TNPD6</b>            |
|-------------------------|-------------------------|-------------------------|
| $3.455 \times 10^{-27}$ | $4.653 \times 10^{-27}$ | $2.522 \times 10^{-27}$ |
| $3.455 \times 10^{-27}$ | $4.653 \times 10^{-27}$ | $2.522 \times 10^{-27}$ |
| $4.382 \times 10^{-27}$ | $6.233 \times 10^{-27}$ | $3.024 \times 10^{-27}$ |
| $1.238 \times 10^{-26}$ | $2.776 \times 10^{-26}$ | $6.337 \times 10^{-27}$ |

**Table S40:** IUPAC names of reference and derivative compounds.

|              |                                                                                                                                                                                                                                                                                                                                                                                                                         |
|--------------|-------------------------------------------------------------------------------------------------------------------------------------------------------------------------------------------------------------------------------------------------------------------------------------------------------------------------------------------------------------------------------------------------------------------------|
| <b>TNPR</b>  | 2,2'-((2Z,2'Z)-5',5''-4(4,4,9,9-tetrakis(3-isobutoxyphenyl)-3,8-dimethyl-4,9-dihydro- <i>s</i> -indaceno[1,2- <i>b</i> :5,6- <i>b'</i> ])dithiophene-2,7-diyl)bis(3-methyl-[2,2'-bithiophene]-5',5'-diyl))bis(methanylylidene))bis(3-oxo-2,3-dihydro-1 <i>H</i> -indene-2,1-diylidene))dimalononitrile                                                                                                                  |
| <b>TNPD1</b> | ( <i>Z</i> )-2-(7-cyano-2-((3-methyl-5'-(4,4,9,9-tetrakis(3-isobutoxyphenyl)-3,8-dimethyl-7-(3'-methyl-5'-(4-naphthalen-1-yl(phenyl)amino)phenyl)-[2,2'-bithiophene]-5-yl)-4,9-dihydro- <i>s</i> -indaceno[1,2- <i>b</i> :5,6- <i>b'</i> ])dithiophene-2-yl)-[2,2'-bithiophene]-5-yl] methylene)-1-oxo-1 <i>H</i> -benzo[ <i>b</i> ]cyclopenta[ <i>d</i> ]thiophene-3(2 <i>H</i> )-ylidene)malonitrile                  |
| <b>TNPD2</b> | ( <i>Z</i> )-2-(6,7-dichloro-2-((3-methyl-5'-(4,4,9,9-tetrakis(3-isobutoxyphenyl)-3,8-dimethyl-7-(3'-methyl-5'-(4-naphthalen-1-yl(phenyl)amino)phenyl)-[2,2'-bithiophene]-5-yl)-4,9-dihydro- <i>s</i> -indaceno[1,2- <i>b</i> :5,6- <i>b'</i> ])dithiophene-2-yl)-[2,2'-bithiophene]-5-yl] methylene)-1-oxo-1 <i>H</i> -benzo[ <i>b</i> ]cyclopenta[ <i>d</i> ]thiophen-3(2 <i>H</i> )-ylidene)malonitrile              |
| <b>TNPD3</b> | ( <i>Z</i> )-2-(2-((3-methyl-5'-(4,4,9,9-tetrakis(3-isobutoxyphenyl)-3,8-dimethyl-7-(3'-methyl-5'-(4-naphthalen-1-yl(phenyl)amino)phenyl)-[2,2'-bithiophene]-5-yl)-4,9-dihydro- <i>s</i> -indaceno[1,2- <i>b</i> :5,6- <i>b'</i> ])dithiophene-2-yl) -[2,2'-bithiophene]-5-yl] methylene)-1-oxo-6,7-bis(trifluoromethyl)-1 <i>H</i> -benzo[ <i>b</i> ]cyclopenta[ <i>d</i> ]thiophen-3(2 <i>H</i> )-ylidene)malonitrile |
| <b>TNPD4</b> | ( <i>Z</i> )-2-(2-((3-methyl-5'-(4,4,9,9-tetrakis(3-isobutoxyphenyl)-3,8-dimethyl-7-(3'-methyl-5'-(4-naphthalen-1-yl(phenyl)amino)phenyl)-[2,2'-bithiophene]-5-yl)-4,9-dihydro- <i>s</i> -indaceno[1,2- <i>b</i> :5,6- <i>b'</i> ])dithiophene-2-yl)-[2,2'-bithiophen]-5-yl] methylene)-7-nitro-1-oxo-1 <i>H</i> -benzo[ <i>b</i> ]cyclopenta[ <i>d</i> ]thiophen-3(2 <i>H</i> )-ylidene)malonitrile                    |
| <b>TNPD5</b> | ( <i>Z</i> )-1-(dicyanomethylene)-2-((3-methyl-5'-(4,4,9,9-tetrakis(3-isobutoxyphenyl)-3,8-dimethyl-7-(3'-methyl-5'-(4-naphthalen-1-yl(phenyl)amino)phenyl)-[2,2'-bithiophene]-5-yl)-4,9-dihydro- <i>s</i> -indaceno[1,2- <i>b</i> :5,6- <i>b'</i> ])dithiophene-2-yl)-[2,2'-bithiophen]-5-yl] methylene)-3-oxo-2,3-dihydro-1 <i>H</i> -benzo[ <i>b</i> ]cyclopenta[ <i>d</i> ]thiophene-6,7-dicarbonitrile             |
| <b>TNPD6</b> | ( <i>Z</i> )-2-(253-methyl-5'-(4,4,9,9-tetrakis(3-isobutoxyphenyl)-3,8-dimethyl-7-(3'-methyl-5'-(4-naphthalen-1-yl(phenyl)amino)phenyl)-[2,2'-bithiophen]-5-yl)-4,9-dihydro- <i>s</i> -indaceno[1,2- <i>b</i> :5,6- <i>b'</i> ])dithiophen-2-yl)-[2,2'-bithiophen]-5-yl] methylene)-6-oxo-5,6-dihydro-4 <i>H</i> -cyclopenta[ <i>b</i> ]thiophen-4-ylidene)malonitrile                                                  |



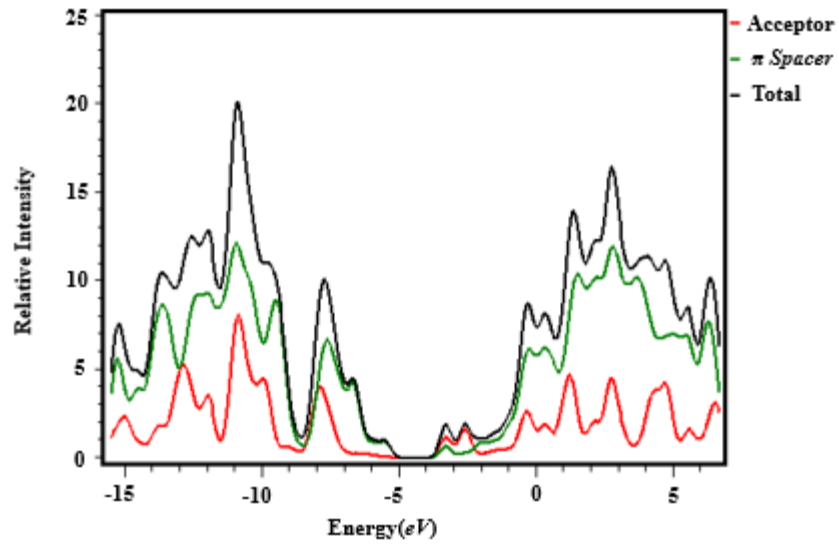

**TNPR**

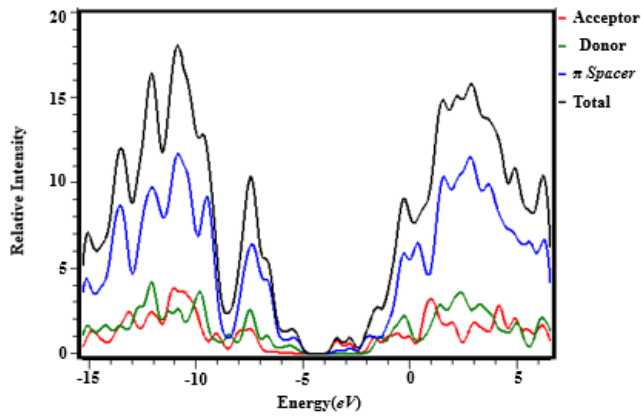

**TNPD1**

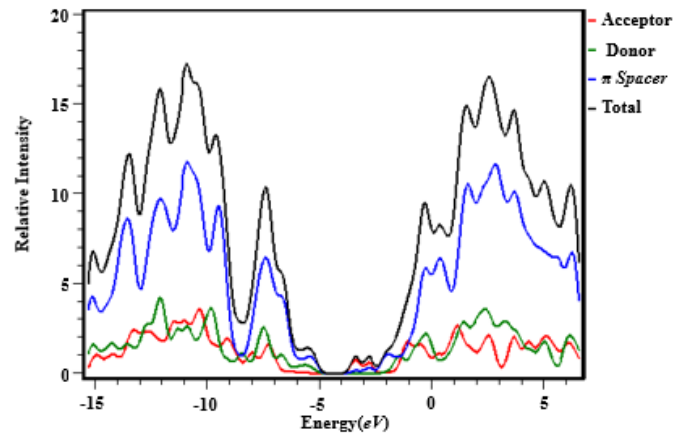

**TNPD2**

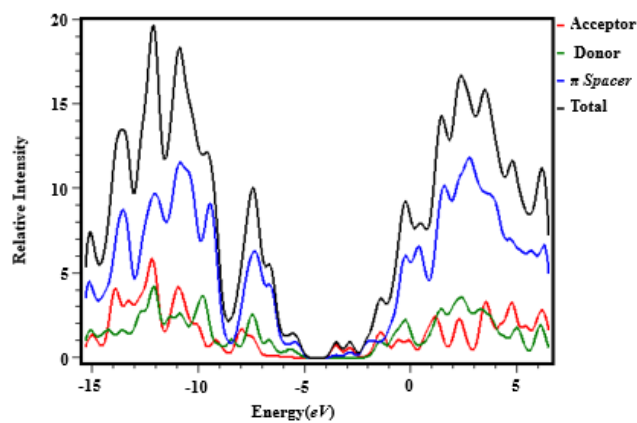

TNPD3

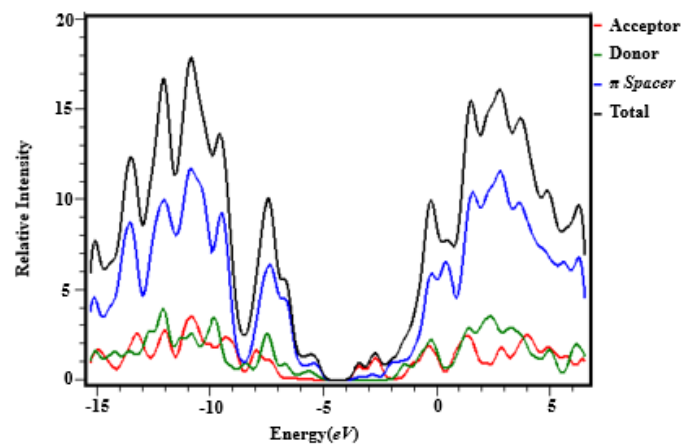

TNPD4

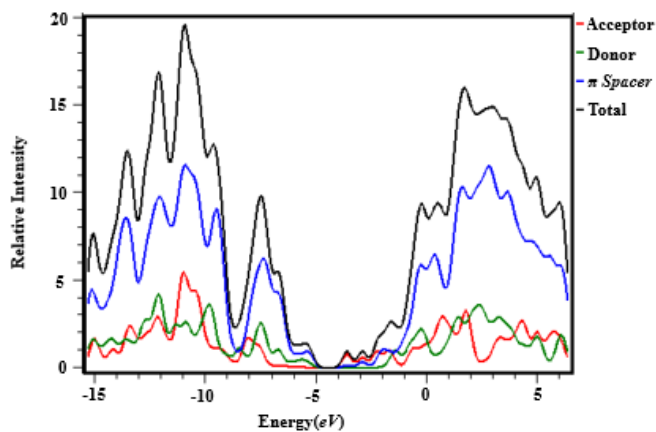

TNPD5

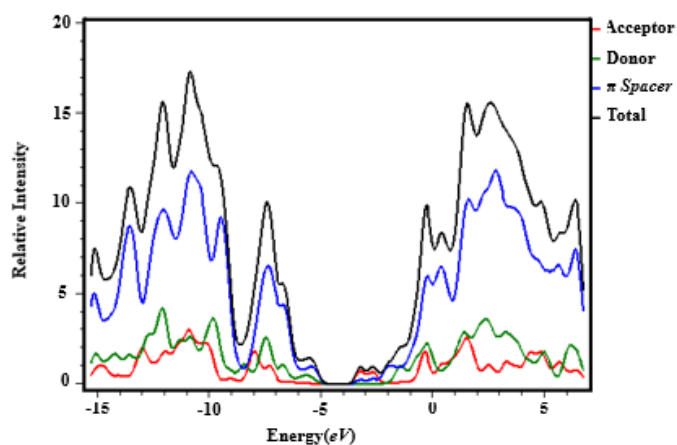

TNPD6

Figure S1: DOS plots of reference (TNPR) and designed compounds (TNPD1 to TNPD6)

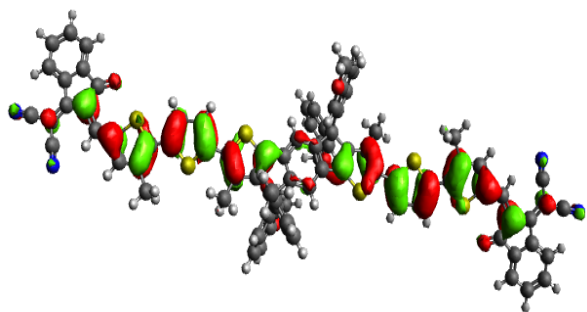

HOMO-1

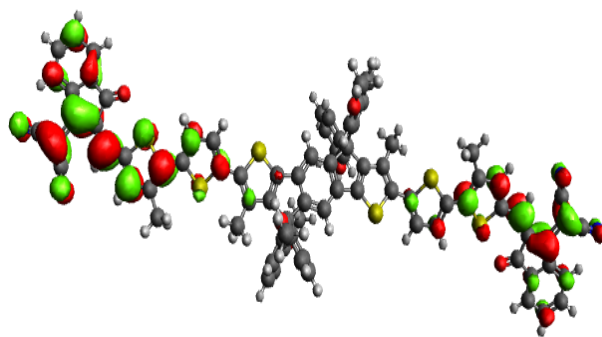

LUMO+1

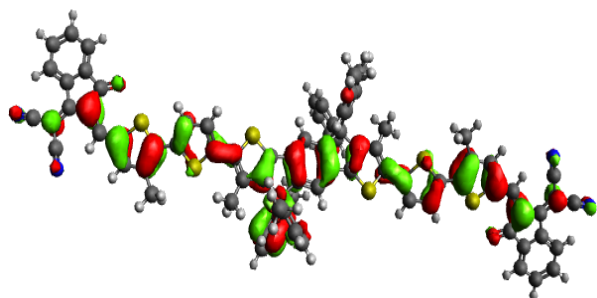

**HOMO-2**

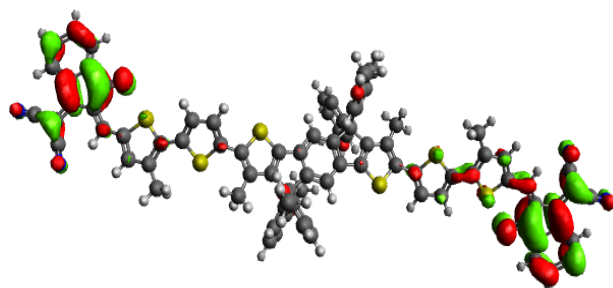

**LUMO+2**

**TNPR**

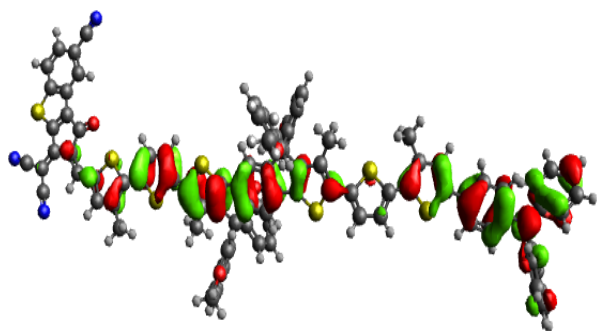

**HOMO-1**

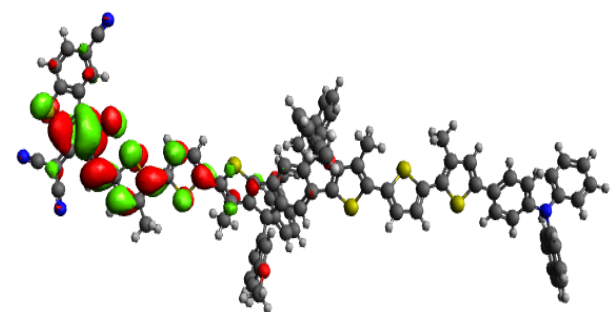

**LUMO+1**

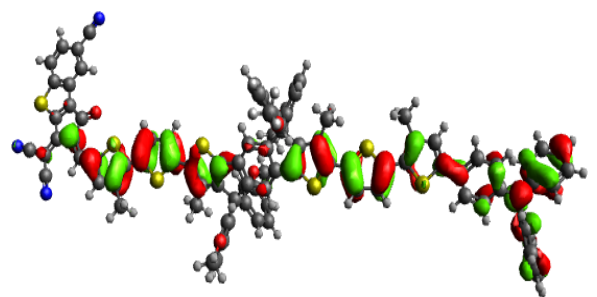

**HOMO-2**

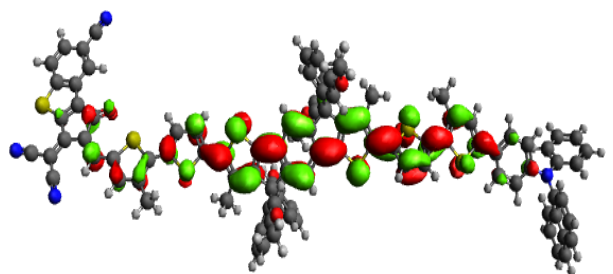

**LUMO+2**

**TNPD1**

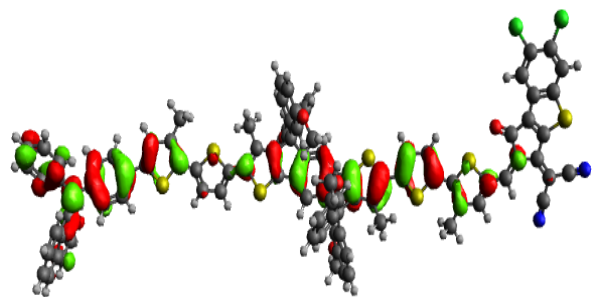

**HOMO-1**

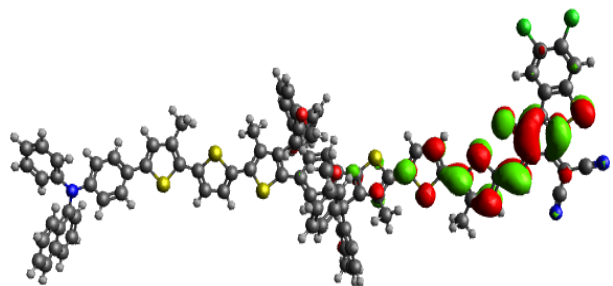

**LUMO+1**

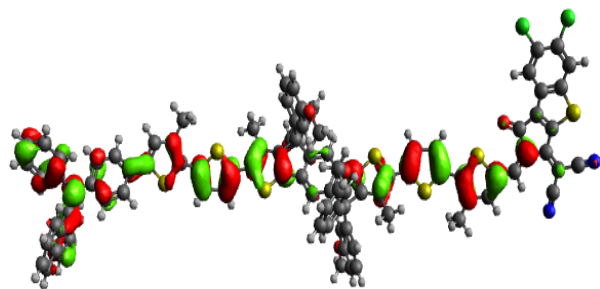

HOMO-2

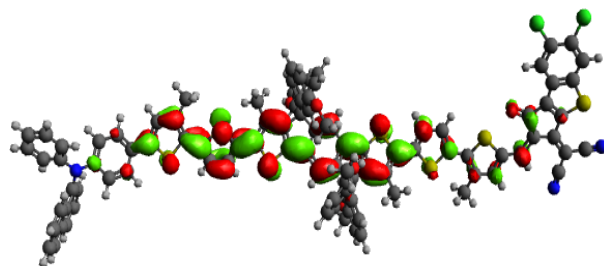

LUMO+2

TNPD2

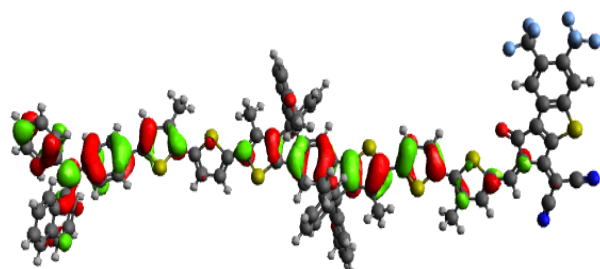

HOMO-1

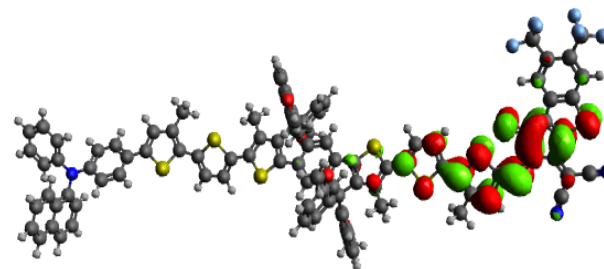

LUMO+1

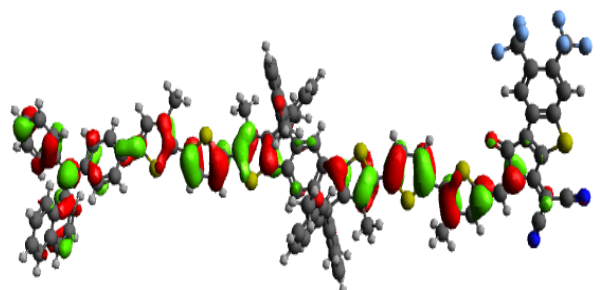

HOMO-2

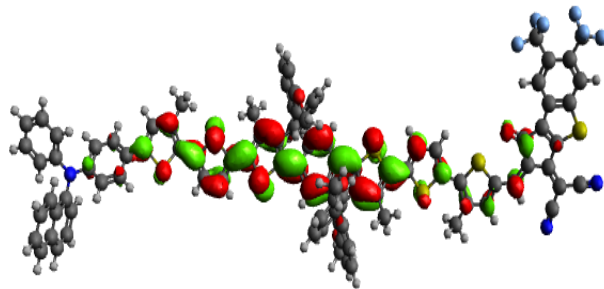

LUMO+2

TNPD3

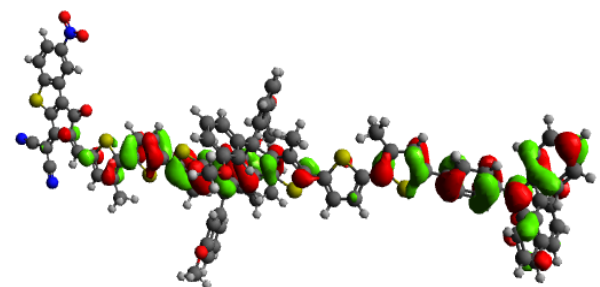

HOMO-1

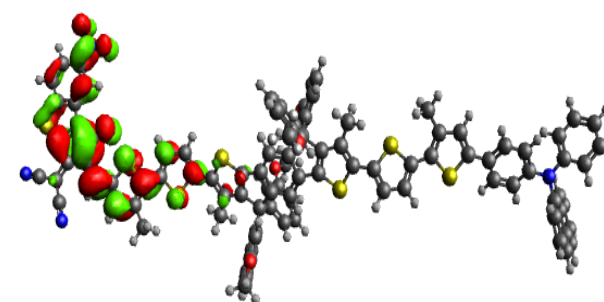

LUMO+1

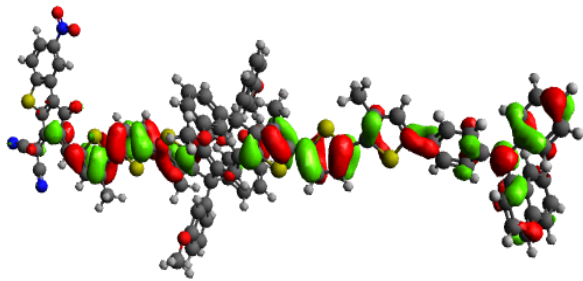

**HOMO-2**

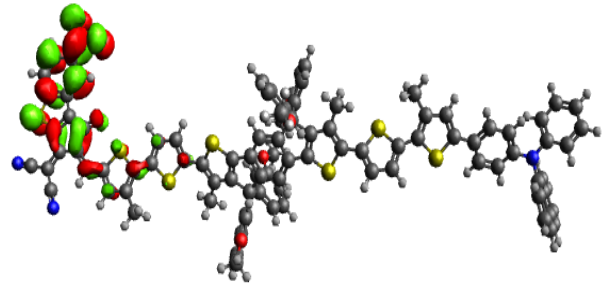

**LUMO+2**

**TNPD4**

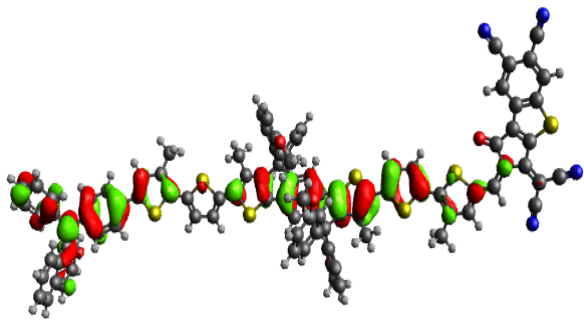

**HOMO-1**

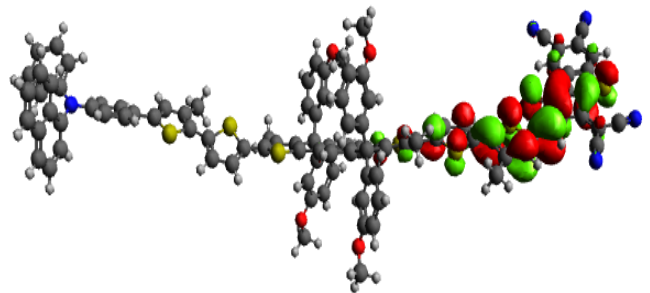

**LUMO+1**

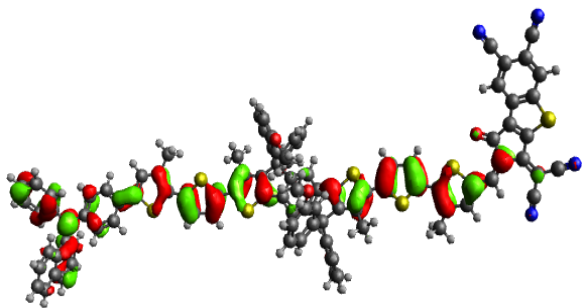

**HOMO-2**

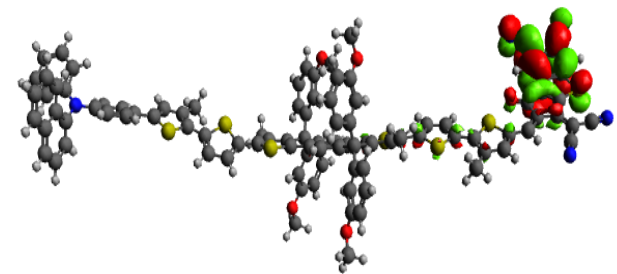

**LUMO+2**

**TNPD5**

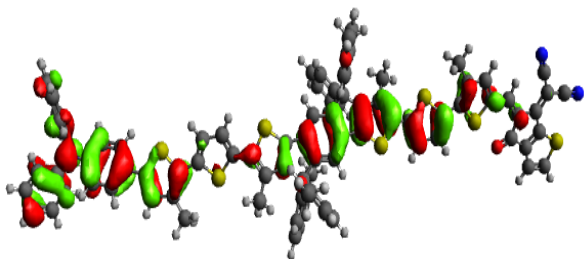

**HOMO-1**

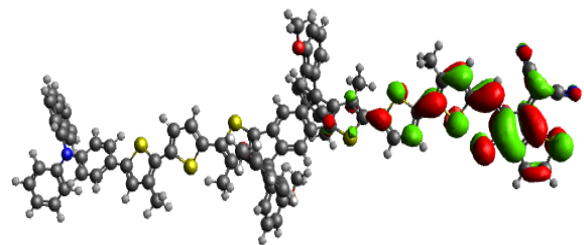

**LUMO+1**

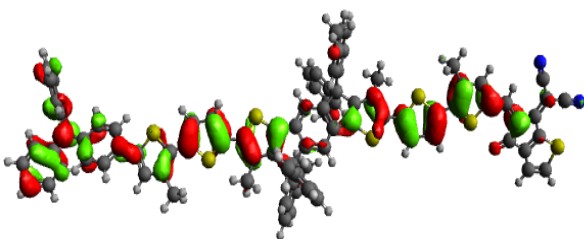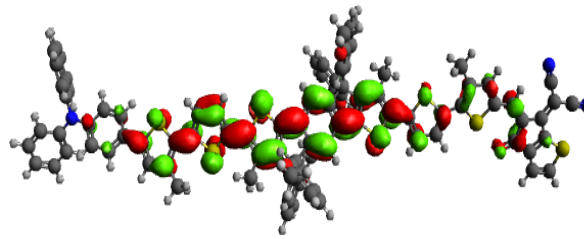

**HOMO-2****LUMO+2****TNPD6**

**Figure S2:**  $E_{\text{HOMO-1}}$ ,  $E_{\text{LUMO+1}}$ ,  $E_{\text{HOMO-2}}$  and  $E_{\text{LUMO+2}}$  contoured structures of reference (TNPR) and designed compounds (TNPD1-TNPD6)

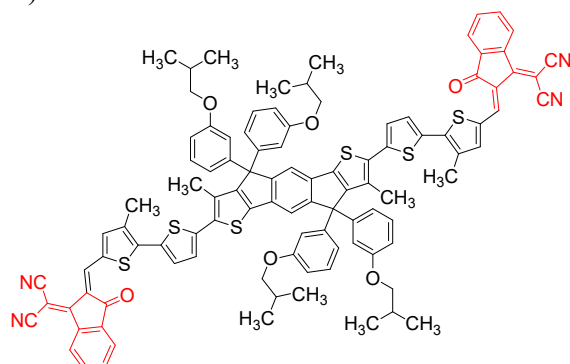**TNPR**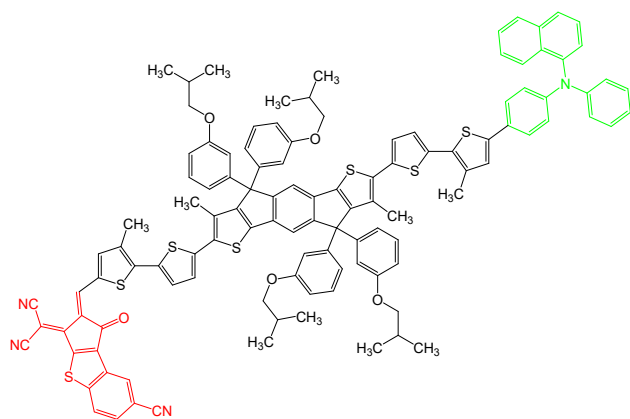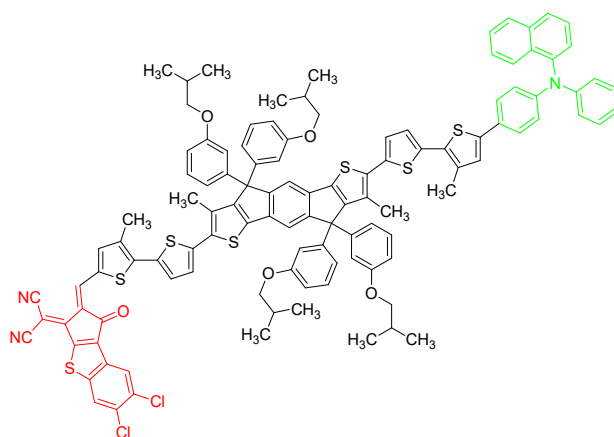**TNPD1****TNPD2**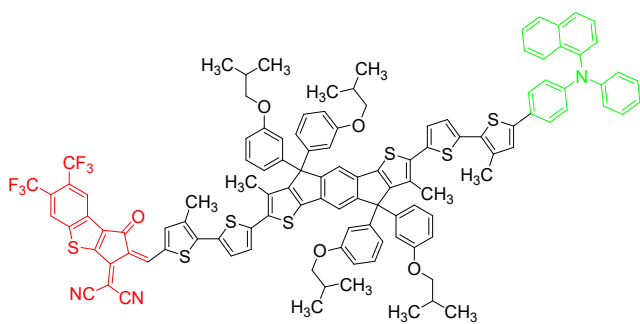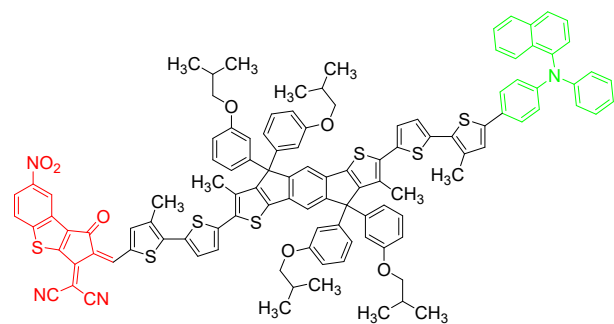**TNPD3****TNPD4**

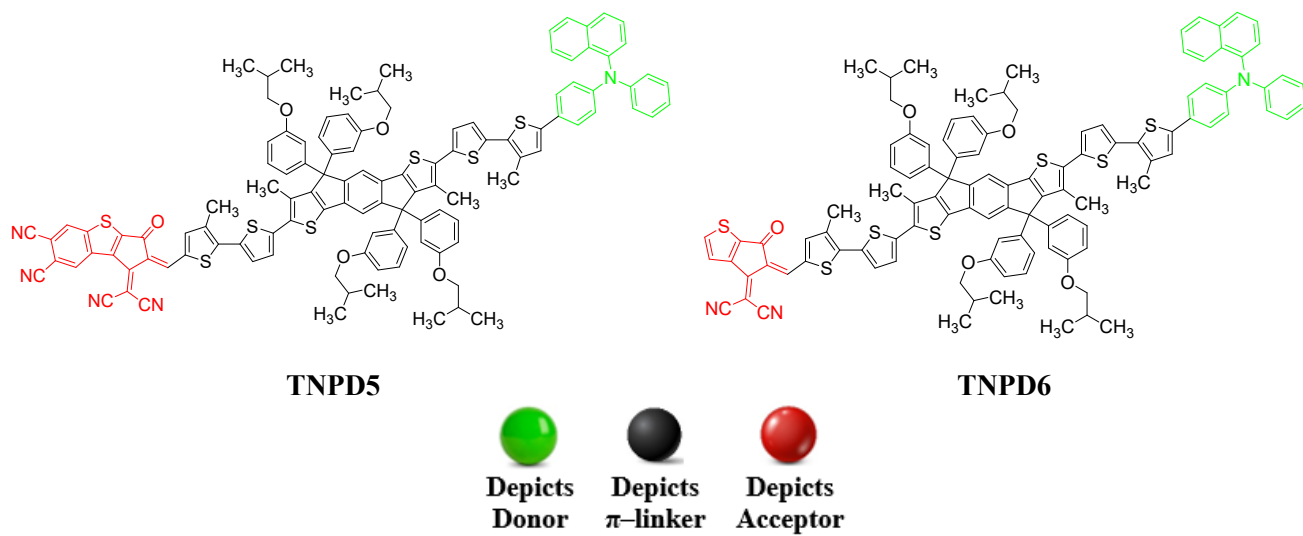

**Figure S3:** Structures of reference (TNPR) and designed compounds (TNPD1-TNPD6)

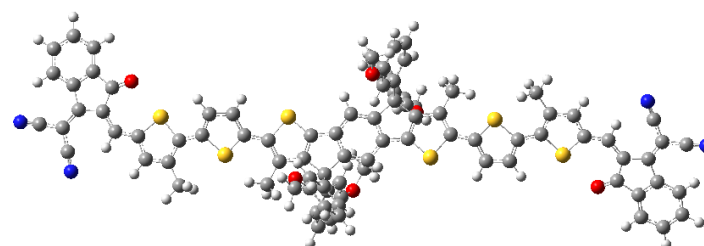

**TNPR**

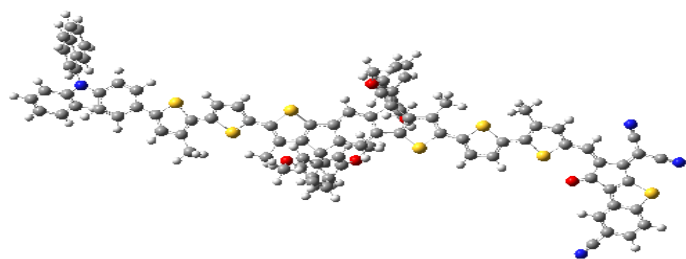

**TNPD1**

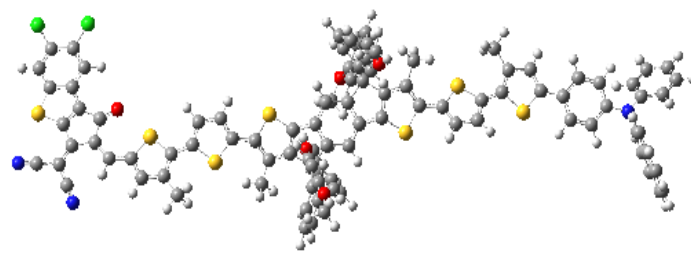

**TNPD2**

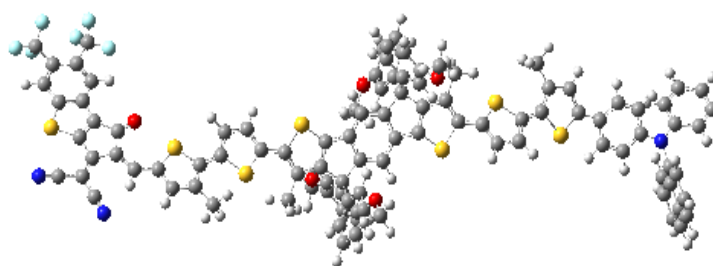

**TNPD3**

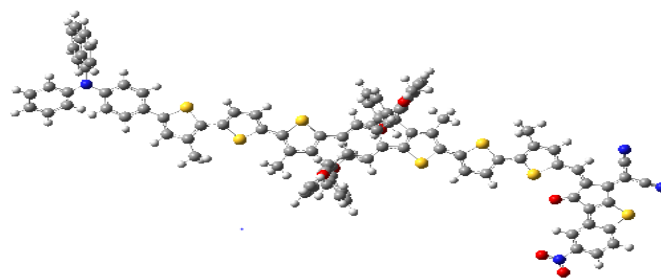

**TNPD4**

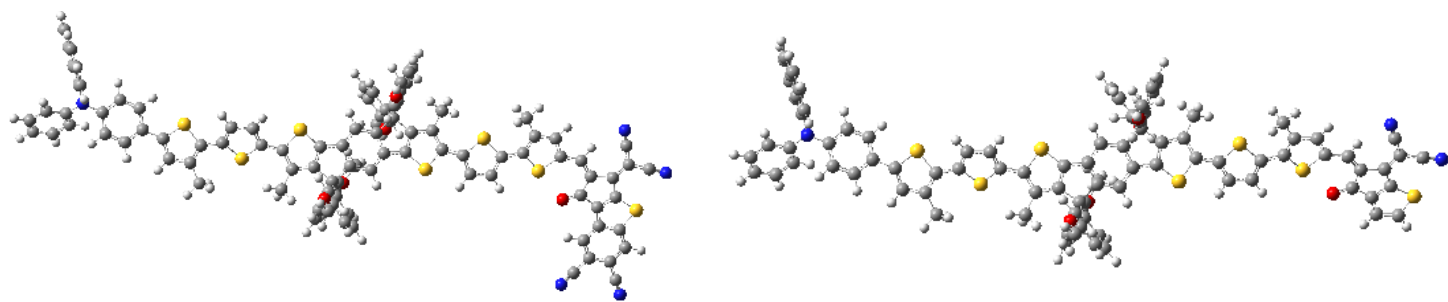

**TNPD5**

**TNPD6**

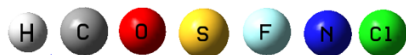

**Figure S4:** Optimized structures of investigated molecules (TNPR and TNPD1-TNPD6)
